# Supplementary material for: Long-term hazard of recurrence in HER2+ breast cancer patients untreated with anti-HER2 therapy
Source: Springer Nature journal article supplement (doi:10.1186/s13058-015-0568-1), 2015-04-15
Supplement: MOESM1 [file 9781424]

**CONFIDENTIAL**

**LIST OF INVESTIGATORS AND IECS/IRBS FOR EGF105485**

| <b>Investigator</b> | <b>Investigator no./Center no.</b> | <b>Description of Research Facility, Hospital/ Institution, and Address</b>            | <b>Name of IEC/IRB Committee, Address, Committee Chair</b>                                                                                                                                                                                                                                                                                                                                                                                                 |
|---------------------|------------------------------------|----------------------------------------------------------------------------------------|------------------------------------------------------------------------------------------------------------------------------------------------------------------------------------------------------------------------------------------------------------------------------------------------------------------------------------------------------------------------------------------------------------------------------------------------------------|
| <b>Argentina</b>    |                                    |                                                                                        |                                                                                                                                                                                                                                                                                                                                                                                                                                                            |
| Alvarez, Anna. MD*  | 100077/032611                      | Instituto Angel H. Roffo, v San Martin 5481, (1417)-Ciudad de Buenos Aires, Argentina. | <p>Comite de Etica, "Dr. Virgilio G. Foglia", Tucuman 335 - 7 "D", (1049) - Ciudad de Buenos Aires, Argentina.</p> <p>Chairperson: Dr. Carlos Barclay</p> <p>Comite de Docencia e Investigacion, del Instituto Angel H. Roffo, (1417) Ciudad de Buenos Aires, Argentina.</p> <p>Chairperson: Dr. Carlos Barclay</p> <p>Comite de Etica, del Instituto Angel H. Roffo, (1417) Ciudad de Buenos Aires, Argentina.</p> <p>Chairperson: Dr. Carlos Barclay</p> |

**CONFIDENTIAL**

| <b>Investigator</b> | <b>Investigator no./Center no.</b> | <b>Description of Research Facility, Hospital/ Institution, and Address</b>                    | <b>Name of IEC/IRB Committee, Address, Committee Chair</b>                                                                                                                                                                                                                                                                             |
|---------------------|------------------------------------|------------------------------------------------------------------------------------------------|----------------------------------------------------------------------------------------------------------------------------------------------------------------------------------------------------------------------------------------------------------------------------------------------------------------------------------------|
| Blajman, Cesar. MD  | 105546/052839                      | ISIS Centro Especializado de LUCE SA, Urquiza 3077 (S3000FFU) - Santa Fe, Argentina.           | <p>Comite de Etica Independiente en Investigacion Clinica "Dr. Carlos A. Barclay", Larrea 1381 3°A. C1117ABK, Buenos Aires, Argentina.</p> <p>Chairperson: Carlos Barclay</p> <p>Comite de Docencia e Investigacion de ISIS Centro Especializado Urquiza 3077, (S3000FFU) - Santa Fe. Argentina.</p> <p>Chairperson: Samuel Seiref</p> |
| Fein, Luis. MD      | 073914/032503                      | Centro Oncologico de Rosario, Av, Boulevard Ororio 1085, (2000) - Rosario Santa Fe- Argentina. | <p>Comite de Etica, "Dr. Virgilio G. Foglia", Tucuman 335 - 7 "D", (1049) - Ciudad de Buenos Aires, Argentina.</p> <p>Chairperson: Carlos Barclay</p> <p>Comite de Docencia e Investigacion del centro Oncologico de Rosario, Av. Boulevard Orono 1085 (2000) Rosario Santa Fe</p>                                                     |

**CONFIDENTIAL**

| <b>Investigator</b>      | <b>Investigator no./Center no.</b> | <b>Description of Research Facility, Hospital/ Institution, and Address</b>                           | <b>Name of IEC/IRB Committee, Address, Committee Chair</b>                                                                                                                                                                                                                                                                                 |
|--------------------------|------------------------------------|-------------------------------------------------------------------------------------------------------|--------------------------------------------------------------------------------------------------------------------------------------------------------------------------------------------------------------------------------------------------------------------------------------------------------------------------------------------|
|                          |                                    |                                                                                                       | Argentina.<br>Chairperson: Dr. Daniel Sarcuno                                                                                                                                                                                                                                                                                              |
| Jankilevich, Gustavo. MD | 095058/046416                      | Instituto Medico Especializado, Hidalgo 568, (C1405BCH) Ciudad Autonoma de Buenos Aires<br>Argentina. | Comite de Etica, "Dr. Virgilio G. Foglia", Tucuman 335 - 7 "D", (1049) - Ciudad de Buenos Aires, Argentina.<br>Chairperson: Dr. Jadzinsky Mauricio<br><br>Comite de Revision Institucional dellnstituto Medico Especializado", Hidalgo 568, (C1405BCH) Ciudad Autonoma de Buenos Aires Argentina.<br>Chairperson: María Victoria Bertolino |
| Lacava, Juan. MD         | 112531/037347                      | Unidad Oncologica de Neuquen<br>Rivadavia 360, (8300)- Neuquen<br>Argentina.                          | Comite de Etica, "Dr. Virgilio G. Foglia", Tucuman 335 - 7 "D", (1049) - Ciudad de Buenos Aires, Argentina.<br>Chairperson: Carlos Barclay                                                                                                                                                                                                 |

**CONFIDENTIAL**

| <b>Investigator</b>  | <b>Investigator no./Center no.</b> | <b>Description of Research Facility, Hospital/ Institution, and Address</b>            | <b>Name of IEC/IRB Committee, Address, Committee Chair</b>                                                                                                                                       |
|----------------------|------------------------------------|----------------------------------------------------------------------------------------|--------------------------------------------------------------------------------------------------------------------------------------------------------------------------------------------------|
|                      |                                    |                                                                                        | <p>Comite Independiente de Docencia e Investigacion CIDel", Rivadavia 360, (8300) Neuquen Argentina.</p> <p>Chairperson: Dr. Ernesto F. Ruiz</p>                                                 |
| Lerzo, Guillermo. MD | 038842/049502                      | IMCABA, Estado de Israel 4718, (C 1185AAS) Ciudad Autonoma de Buenos Aires, Argentina. | <p>Comite de Etica Independiente en Investigacion Clinica "Dr. Carlos A. Barclay", Larrea 1381 3°A. C1117ABK, Ciudad Autónoma de Buenos Aires, Argentina.</p> <p>Chairperson: Carlos Barclay</p> |
| Lerzo, Guillermo. MD | 038842/034125                      | LUCEN, Jauretche 24, (1405) - Ciudad Autonoma de Buenos Aires, Argentina.              | <p>Comite de Etica, "Dr. Virgilio G. Foglia", Tucuman 335 - 7 "D", (1049) - Ciudad de Buenos Aires, Argentina.</p> <p>Chairperson: Dr. Rome Nicolas</p>                                          |

**CONFIDENTIAL**

| <b>Investigator</b>    | <b>Investigator no./Center no.</b> | <b>Description of Research Facility, Hospital/ Institution, and Address</b>               | <b>Name of IEC/IRB Committee, Address, Committee Chair</b>                                                                                                                                  |
|------------------------|------------------------------------|-------------------------------------------------------------------------------------------|---------------------------------------------------------------------------------------------------------------------------------------------------------------------------------------------|
| Richardet, Eduardo. MD | 112486/037349                      | IONC, Dean Funes 477, (X5000JFK) – Cordoba, Argentina.                                    | Comite Institucional de Etica de la Investigacion en Salud - CIEIS IONC, Balcarce 451, (X5000JFK)- Ciudad de Córdoba, Provincia de Córdoba, Argentina.<br><br>Chairperson: Pablo Carmignani |
| Varela, Mirta. MD      | 094383/032610                      | CER Instituto Medico, Vicente Lopez 1441, (1878)- Quilmes,Buenos Aires- Argentina         | Comité de Ética de CER Instituto Médico (CECIC) Avda. Vicente López 1441 (1878) Quilmes O., Provincia de Buenos Aires, Argentina.<br><br>Chairperson: Dr. Damián Del Percio                 |
| Zarba, Juan. MD        | 093585/032502                      | Centro Medico San Roque, Balcarce 579, (4000) - San Miguel de Tucuman, Tucuman Argentina. | Comite de Etica Independiente en Investigacion Clinica "Dr. Carlos A. Barclay", Larrea 1381 3°A. C1117ABK, Ciudad Autónoma de Buenos Aires, Argentina.<br><br>Chairperson: Carlos Barclay   |

**CONFIDENTIAL**

| <b>Investigator</b>                                                                                                | <b>Investigator no./Center no.</b> | <b>Description of Research Facility, Hospital/ Institution, and Address</b>                                                                            | <b>Name of IEC/IRB Committee, Address, Committee Chair</b>                                                                                                                                                                                                                                                                            |
|--------------------------------------------------------------------------------------------------------------------|------------------------------------|--------------------------------------------------------------------------------------------------------------------------------------------------------|---------------------------------------------------------------------------------------------------------------------------------------------------------------------------------------------------------------------------------------------------------------------------------------------------------------------------------------|
|                                                                                                                    |                                    |                                                                                                                                                        | <p>Comite de Docencia e Investigacion Centro Medico San Roque, Balcarce 579, (4000)- San Miguel de Tucuman, Provincia de Tucumán, Argentina.</p> <p>Chairperson: Luis F. Medina</p>                                                                                                                                                   |
| <b>Australia</b>                                                                                                   |                                    |                                                                                                                                                        |                                                                                                                                                                                                                                                                                                                                       |
| <p>Beadle, Geoffrey. MBBS<br/>                     McCarthy, Nicole. MBBS<br/>                     (Former PI)</p> | <p>040168/032839</p>               | <p>Royal Brisbane and Women's Hospital,<br/>                     Butterfield Street, Herston, Queensland, 4029<br/>                     Australia.</p> | <p>Royal Brisbane and Women's Hospital<br/>                     Human Research Ethics Committee Level 7,<br/>                     Block 7, Royal Brisbane and Women's<br/>                     Hospital, Butterfield Street, Herston,<br/>                     Queensland, 4029 Australia.</p> <p>Chairperson: Dr. Conor J Brophy</p> |

**CONFIDENTIAL**

| <b>Investigator</b> | <b>Investigator no./Center no.</b> | <b>Description of Research Facility, Hospital/ Institution, and Address</b>                                                       | <b>Name of IEC/IRB Committee, Address, Committee Chair</b>                                                                                                                                      |
|---------------------|------------------------------------|-----------------------------------------------------------------------------------------------------------------------------------|-------------------------------------------------------------------------------------------------------------------------------------------------------------------------------------------------|
| Boyle, Frances. PhD | 060713/031103                      | The Mater Hospital, St Vincent's and Mater Health, Sydney, Ltd, 25 Rocklands Road North Sydney, New South Wales, 2060, Australia. | St Vincent's Hospital Human Research Ethics Committee, Research Office, Level 6 deLacy Building, 390 Victoria Street, Darlinghurst NSW 2010, Australia.<br><br>Chairperson: Prof. Jo-Anne Brien |
| Chan, Arlene. MBBS  | 060716/031048                      | Mount Medical Centre, 146 Mounts Bay Road, Perth 6000, Western Australia, Australia.                                              | Mount Hospital Ethics Committee, 150 Mounts Bay Road, Perth 6000, Western Australia, Australia.<br><br>Chairperson: Jade Phelan.                                                                |
| Chern, Boris. MBBS  | 027038/031105                      | Redcliffe Hospital, Anzac Avenue, Redcliffe-Queensland 4020, Australia.                                                           | The Redcliffe-Caboolture Ethics Committee, Redcliffe Hospital, Anzac Avenue, Redcliffe-Queensland 4020, Australia.<br><br>Chairperson: Mr Mark Zgrajewski                                       |

**CONFIDENTIAL**

| <b>Investigator</b>        | <b>Investigator no./Center no.</b> | <b>Description of Research Facility, Hospital/ Institution, and Address</b>   | <b>Name of IEC/IRB Committee, Address, Committee Chair</b>                                                                                                                                      |
|----------------------------|------------------------------------|-------------------------------------------------------------------------------|-------------------------------------------------------------------------------------------------------------------------------------------------------------------------------------------------|
| Chirgwin, Jacqueline. MBBS | 076771/031049                      | Maroondah Breast Clinic, 20 Grey St, Ringwood East, Victoria 3135, Australia. | Eastern Health Research and Ethics Committee, Level 2, Clive Ward Centre, 16 Arnold Street, Box Hill, Victoria 3128, Australia.<br><br>Chairperson: Prof Bridie Kent                            |
| Chirgwin, Jacqueline. MBBS | 076771/031050                      | Box Hill Hospital, Nelson Road, Box Hill, Victoria 3128, Australia.           | Eastern Health Research and Ethics Committee, Level 2, Clive Ward Centre, 16 Arnold Street, Box Hill, Victoria 3128,.<br><br>Chairperson: Prof Bridie Kent                                      |
| Dalley, David. MBBS        | 096713/031109                      | St Vincents Hospital, 390 Victoria Street, Darlinghurst, NSW 2010, Australia. | St Vincent's Hospital Human Research Ethics Committee, Research Office, Level 6 deLacy Building, 390 Victoria Street, Darlinghurst NSW 2010, Australia.<br><br>Chairperson: Prof. Jo-Anne Brien |



**CONFIDENTIAL**

| <b>Investigator</b>   | <b>Investigator no./Center no.</b> | <b>Description of Research Facility, Hospital/ Institution, and Address</b>                                     | <b>Name of IEC/IRB Committee, Address, Committee Chair</b>                                                                                                                         |
|-----------------------|------------------------------------|-----------------------------------------------------------------------------------------------------------------|------------------------------------------------------------------------------------------------------------------------------------------------------------------------------------|
| deBoer, Richard. MBBS | 030359/032570                      | Royal Melbourne Hospital, Department of Medical Oncology, Grattan Street, Parkville, Victoria, 3050, Australia. | Melbourne Health Human Research Ethics Committee, Royal Melbourne Hospital, Grattan Street, Parkville, Victoria, 3050, Australia.<br><br>Chairperson: Prof. Peter Colman           |
| deBoer, Richard. MBBS | 030359/032571                      | Western Hospital, Department of Medical Oncology, Gordon Street, Footscray, Victoria, 3011 Australia.           | Melbourne Health Human Research Ethics Committee, Royal Melbourne Hospital, Grattan Street, Parkville, Victoria, 3050 Australia.<br><br>Chairperson: Prof. Peter Colman            |
| Foo, Serene. MBBS     | 092805/031111                      | Breast Unit at Mercy Private, Level 2, 166 Gipps Street, East Melbourne, Victoria, 3002 Australia.              | Mercy Health and Aged Care Inc, 678 Victoria Parade, Richmond, Victoria, 3121, Australia.<br><br>Chairperson: Professor Janis (John) Ozolins.<br>Austin Health Research and Ethics |

**CONFIDENTIAL**

| Investigator      | Investigator no./Center no. | Description of Research Facility, Hospital/ Institution, and Address                           | Name of IEC/IRB Committee, Address, Committee Chair                                                                                                                                                                                                                                                                              |
|-------------------|-----------------------------|------------------------------------------------------------------------------------------------|----------------------------------------------------------------------------------------------------------------------------------------------------------------------------------------------------------------------------------------------------------------------------------------------------------------------------------|
|                   |                             |                                                                                                | <p>Committee, Austin Hospital, 145 Studley Road, Heidelberg, Victoria, 3084 Australia.</p> <p>Chairperson: Prof David Taylor</p>                                                                                                                                                                                                 |
| Foo, Serene. MBBS | 092805/034704               | Austin Hospital Campus, Austin Health, 145 Studley Road, Heidelberg, Victoria, 3084 Australia. | <p>Mercy Health and Aged Care Inc., 678 Victoria Parade, Richmond, Victoria, 3121 Australia.</p> <p>Chairperson: Professor Janis (John) Ozolins.</p> <p>(Austin) Austin Health Research and Ethics Committee, Austin Hospital, 145 Studley Road, Heidelberg, Victoria, 3084 Australia.</p> <p>Chairperson: Prof David Taylor</p> |

**CONFIDENTIAL**

| <b>Investigator</b>    | <b>Investigator no./Center no.</b> | <b>Description of Research Facility, Hospital/ Institution, and Address</b>                                                   | <b>Name of IEC/IRB Committee, Address, Committee Chair</b>                                                                                                                                           |
|------------------------|------------------------------------|-------------------------------------------------------------------------------------------------------------------------------|------------------------------------------------------------------------------------------------------------------------------------------------------------------------------------------------------|
| Koczwarra, Bogda. MBBS | 067281/031106                      | Flinders Medical Centre, Department of Medical Oncology,<br>Flinders Drive, Bedford Park, South Australia,<br>5042 Australia. | Flinders Clinical Research Ethics Committee,<br>Level 2, Flinders Medical Centre, Flinders Drive, Bedford Park, South Australia, 5042 Australia.<br><br>Chairperson: Prof David Gordon               |
| Lynch, Jodi. MBBS      | 073424/031104                      | St George Hospital, Gray Street, Kogarah, NSW 2217 Australia.                                                                 | South Eastern Sydney Local Health Network HREC (Southern Sector) c/o The St George Hospital, Gray Street, Kogarah, NSW 2217 Australia.<br><br>Chairperson: Associate Professor Winston Liauw         |
| Nowak, Anna. MBBS      | 089087/031110                      | Sir Charles Gairdner Hospital, Hospital Avenue, Nedlands WA 6009, Australia.                                                  | Sir Charles Gairdner Hospital, Human Research Ethics Committee, Sir Charles Gairdner Hospital, 1st Floor E Block, Hospital Avenue, Nedlands WA 6009, Australia.<br><br>Chairperson: Prof. D.A. Joyce |

**CONFIDENTIAL**

| <b>Investigator</b>      | <b>Investigator no./Center no.</b> | <b>Description of Research Facility, Hospital/ Institution, and Address</b>                                                               | <b>Name of IEC/IRB Committee, Address, Committee Chair</b>                                                                                                                                                         |
|--------------------------|------------------------------------|-------------------------------------------------------------------------------------------------------------------------------------------|--------------------------------------------------------------------------------------------------------------------------------------------------------------------------------------------------------------------|
| Patterson, William. MBBS | 105310/034673                      | Lyell McEwin Hospital, Department of Haematology/Oncology, Oldham Road, Elizabeth Vale, South Australia, Australia 5112                   | Central Northern Adelaide Health Service Ethics of Human Research Committee, The Queen Elizabeth Hospital, 28 Woodville Road, Woodville South, 5011 Australia.<br><br>Chairperson: Timothy Matthew                 |
| Patterson, William. MBBS | 105310/034674                      | The Queen Elizabeth Hospital, Department of Haematology and Oncology, 28 Woodville Road, Woodville South, South Australia 5011 Australia. | Central Northern Adelaide Health Service Ethics of Human Research Committee, The Queen Elizabeth Hospital, 28 Woodville Road, Woodville South, South Australia 5011 Australia.<br><br>Chairperson: Timothy Matthew |

**CONFIDENTIAL**

| <b>Investigator</b>                                      | <b>Investigator no./Center no.</b> | <b>Description of Research Facility, Hospital/ Institution, and Address</b>                                 | <b>Name of IEC/IRB Committee, Address, Committee Chair</b>                                                                                                                                        |
|----------------------------------------------------------|------------------------------------|-------------------------------------------------------------------------------------------------------------|---------------------------------------------------------------------------------------------------------------------------------------------------------------------------------------------------|
| Shannon, Catherine.<br>MBBS(Hons)                        | 067276/031051                      | Mater Adult Hospital, Raymond Terrace, South Brisbane, Queensland, 4101 Australia.                          | Mater Health Services Human Research Ethics Committee, Room 235, Level 2 Aubigny Place, Raymond Terrace, South Brisbane, Queensland, 4101 Austratia.<br><br>Chairperson: Mr Andrew Crowden        |
| Snyder, Raymond. MBBS                                    | 037288/031053                      | St Vincents Hospital, Healey Wing, 41 Victoria Parade, Fitzroy, Victoria 3065, Australia.                   | St Vincent's Hospital Human Research Ethics Committee, St Vincent's Hospital, 1st Floor Healy Wing, 41 Victoria Parade, Fitzroy, Victoria, 3065 Australia.<br><br>Chairperson: Prof Jo-anne Brien |
| Underhill, Craig. MBBS<br>Clarke, Kerrie. MD (Former PI) | 055873/031052                      | Border Medical Oncology, Murray Valley Private Hospital, Nordsvan Drive, Wodonga, Victoria 3690, Australia. | Wodonga Regional Health Service Joint Hospitals' Ethics Committee, Vermont Street (PO Box 156), Wodonga, Victoria 3689 Australia.<br><br>Chairperson: Greg Pearl                                  |

**CONFIDENTIAL**

| <b>Investigator</b>          | <b>Investigator no./Center no.</b> | <b>Description of Research Facility, Hospital/ Institution, and Address</b>                                                        | <b>Name of IEC/IRB Committee, Address, Committee Chair</b>                                                                                                                                                                                                                                                                                                |
|------------------------------|------------------------------------|------------------------------------------------------------------------------------------------------------------------------------|-----------------------------------------------------------------------------------------------------------------------------------------------------------------------------------------------------------------------------------------------------------------------------------------------------------------------------------------------------------|
| <b>Belgium</b>               |                                    |                                                                                                                                    |                                                                                                                                                                                                                                                                                                                                                           |
| Awada, Ahmad. MD             | 027308/030859                      | Institut Jules Bordet, Centre des Tumeurs de l'Universite Libre de Bruxelles, Boulevard de Waterloo 121, B-1000 Brussels, Belgium. | Comite D'Ethique, Institut Jules Bordet, Boulevard de Waterloo 125, B-1000 Bruxelles, Belgium.<br><br>Chairperson- Dr Thierry Gil                                                                                                                                                                                                                         |
| <b>Brazil</b>                |                                    |                                                                                                                                    |                                                                                                                                                                                                                                                                                                                                                           |
| Barrios, Carlos Henrique. MD | 085726/038824                      | Centro de Pesquisas Clínicas em Oncologia, Av. Ipiranga 6690 sala 228, Porto Alegre, Rio Grande Do Sul, 90610 000 Brazil.          | Comite de Etica em Pesquisa do Hospital Sao Lucas da PUC/RS AV. Ipiranga 6690 3 andar Jardim Botanico, Zip Code: 90. 610-000, Porto Alegre- RS.<br><br>Local IRB Chairperson: Rodolfo Herberto Schneider<br><br>CONEP, Esplanada dos Ministerios-Bloco G,anexoa Ala B, sala 147, 1 andar, Brasilia, Brazil.<br><br>National IRB Chairperson: Gyséle Saddi |

**CONFIDENTIAL**

| <b>Investigator</b> | <b>Investigator no./Center no.</b> | <b>Description of Research Facility, Hospital/ Institution, and Address</b>                            | <b>Name of IEC/IRB Committee, Address, Committee Chair</b>                                                                                                                                                                                                                                                                                                                                                                                                                                                                                           |
|---------------------|------------------------------------|--------------------------------------------------------------------------------------------------------|------------------------------------------------------------------------------------------------------------------------------------------------------------------------------------------------------------------------------------------------------------------------------------------------------------------------------------------------------------------------------------------------------------------------------------------------------------------------------------------------------------------------------------------------------|
|                     |                                    |                                                                                                        | Tannous. CONEP - Comissao Nacional de Etica em Pesquisa                                                                                                                                                                                                                                                                                                                                                                                                                                                                                              |
| Cortes, Eduardo. MD | 079294/038815                      | Hospital Universitario Clementino Fraga Filho-UFRJ, Ilha do Fundão, Rio de Janeiro, 21941-913, Brazil. | <p>Comite de Etica em Pesquisa Clinica da UFRJ, Hospital UniverSitario Clementino Fraga Filho - Faculdade de Medicina<br/>Rua Professor Rodolpho Paulo Rocco. 255.<br/>Ilha do Fundao, Rio de Janeiro - RJ zip code: 21941-913 – Brazil.</p> <p>Local IRB Chairperson: Alice Helena Duarte Violante</p> <p>CONEP. Esplanada dos Ministerios-Bloco G. anexo a Ala B. sala 147, 1oandar Brasilia - DF - ZIP CODE 70058-900 – Brazil</p> <p>National IRB Chairperson: Gysélle Saddi</p> <p>Tannous. CONEP - Comissao Nacional de Etica em Pesquisa.</p> |

**CONFIDENTIAL**

| <b>Investigator</b> | <b>Investigator no./Center no.</b> | <b>Description of Research Facility, Hospital/ Institution, and Address</b>                                              | <b>Name of IEC/IRB Committee, Address, Committee Chair</b>                                                                                                                                                                                                                                                                                                                                                                         |
|---------------------|------------------------------------|--------------------------------------------------------------------------------------------------------------------------|------------------------------------------------------------------------------------------------------------------------------------------------------------------------------------------------------------------------------------------------------------------------------------------------------------------------------------------------------------------------------------------------------------------------------------|
| Cruz, Felipe Jose   | 203252/038827                      | Faculdade de Medicina do ABC, Endereco: Avenida Principe de Gales, 821 - Anexo III, 09060-650 Santo Andre - SP – Brazil. | <p>Comite de Eotica em Pesquisa Clinica da Faculdade de Medicina do ABC; Avenida Principe de Gales, 821 – Santo. Andre - SP – 09060-650 Brazil.</p> <p>Local IRB Chairperson: Márcia R. G. Tamosauskas</p> <p>CONEP, Esplanada dos Ministerios-Bloco G, anexo aAla B, sala 147,1oandar, Brasilia, Brazil- CEP 70058-900.</p> <p>National IRB Chairperson: Gyséle Saddi Tannous.CONEP - Comissao Nacional de Etica em Pesquisa.</p> |
| Oliveira, Célia     | 094615/038828                      | Instituto Brasileiro de Controle do Cancer, Avenida Alcantara Machado, 2576, CEP: 03102-002· SAo Paulo - SP – Brazil.    | <p>Comite de Eotica em Pesquisa Clinica da IBCC; Avenida Alcantra Machado, 2576 - CEP: 03102-002 - Sao Paulo - SP- Brazil.</p> <p>Local IRB Chairperson: José Costa de</p>                                                                                                                                                                                                                                                         |



**CONFIDENTIAL**

| Investigator           | Investigator no./Center no. | Description of Research Facility, Hospital/ Institution, and Address            | Name of IEC/IRB Committee, Address, Committee Chair                                                                                                                                                                                                                 |
|------------------------|-----------------------------|---------------------------------------------------------------------------------|---------------------------------------------------------------------------------------------------------------------------------------------------------------------------------------------------------------------------------------------------------------------|
|                        |                             |                                                                                 | <p>Andrade</p> <p>CONEP, Esplanada dos Ministerios-Bloco G, anexo aAla B, sala 147,1 andar, Brasilia, CEP 70058-900 Brazil.</p> <p>National IRB Chairperson: Gyséle Saddi Tannous CONEP - Comissao Nacional de Etica em Pesquisa.</p>                               |
| Wainstein, Alberto. MD | 085735/038830               | Biocancer, Bernardo Monteiro 918, suíte 904, Belo Horizonte, 30150-281, Brazil. | <p>Comite de etica em Pesquisa Clinica do Hospital Alberto Cavalcanti, Alameda Alvaro Celso, 100 - Santa Efigenia - Belo Horizonte - MG 30.150-260 Brazil.</p> <p>Local IRB Chairperson: Vanderson Assis Romualdo</p> <p>CONEP, Esplanada dos Ministerios-Bloco</p> |

**CONFIDENTIAL**

| Investigator       | Investigator no./Center no. | Description of Research Facility, Hospital/ Institution, and Address                                           | Name of IEC/IRB Committee, Address, Committee Chair                                                                                                                                                                                                                                                                                                                                                 |
|--------------------|-----------------------------|----------------------------------------------------------------------------------------------------------------|-----------------------------------------------------------------------------------------------------------------------------------------------------------------------------------------------------------------------------------------------------------------------------------------------------------------------------------------------------------------------------------------------------|
|                    |                             |                                                                                                                | <p>G,anexo a Ala B,sala 147,1oandar - Brasilia - DF 70.058-900 Brazil.</p> <p>National IRB Chairperson: Gyséle Saddi Tannous CONEP - Comissao Nacional de Etica em Pesquisa.</p>                                                                                                                                                                                                                    |
| Zereu, Manuela. MD | 049576/038831               | Irmandade da Santa Casa de Misericórdia de Porto Alegre, Rua Annes Dias, 295, Porto Alegre, 90020-090, Brazil. | <p>Comite de Etica em Pesquisa Clinica da Irmandade Santa Casa de Misericordia de Porto Alegre</p> <p>Rua Professor Annes Dias, 295</p> <p>Porto Alegre - RS CEP: 90020-090 Brazil.</p> <p>Local IRB Chairperson: Cláudio Teloken</p> <p>CONEP, Esplanada dos Ministerios-Bloco G,anexoa Ala B, sala 147, 1oandar, Brasilia, Brazil-CEP 70098-900</p> <p>National IRB Chairperson: Gyséle Saddi</p> |

**CONFIDENTIAL**

| <b>Investigator</b>    | <b>Investigator no./Center no.</b> | <b>Description of Research Facility, Hospital/ Institution, and Address</b>                                       | <b>Name of IEC/IRB Committee, Address, Committee Chair</b>                                                                                                       |
|------------------------|------------------------------------|-------------------------------------------------------------------------------------------------------------------|------------------------------------------------------------------------------------------------------------------------------------------------------------------|
|                        |                                    |                                                                                                                   | Tannous CONEP - Comissao Nacional de Etica em Pesquisa.                                                                                                          |
| <b>Canada</b>          |                                    |                                                                                                                   |                                                                                                                                                                  |
| Blondal, John. MD      | 005245/038974                      | Saint. Joseph's Health Centre, 30 The Queensway. SSW 601, Toronto, ON M6R 1B5 Canada                              | Dept Clinical Ethics, Saint Joseph's Health Centre, 30 The Queensway, Toronto, Ontario, M6R 1B5 Canada.<br><br>Chairperson- Hazel Markwell                       |
| Chang, Jose. MD        | 005117/033427                      | Lakeridge Health Osbawa, RS Mclaughlin Durham Regional Cancer Centre, 1 Hospital Court Osbawa, ON L1G 2B9 Canada. | Research Ethics Board, Lakeridge Health Osbawa, 1 Hospital Court, Oshawa, ON L1G 2B9 Canada.<br><br>Chairperson- John Montgomery                                 |
| Desjardins, Pierre. MD | 004711/033950                      | Hopital Charles LeMoyne, 3120, Boulevard Tascbereau, Greenfield Park QC J4 V 2H1 Canada.                          | Comite d'ethique de la recherch  Hopital Charles LeMoyne 3120, boulevard Taschereau, Greenfield Park, Quebec, J4V 2H1 Canada.<br><br>Chairperson- Sylvain Brunet |

**CONFIDENTIAL**

| <b>Investigator</b>    | <b>Investigator no./Center no.</b> | <b>Description of Research Facility, Hospital/ Institution, and Address</b>                                                  | <b>Name of IEC/IRB Committee, Address, Committee Chair</b>                                                                                                                                                                                                       |
|------------------------|------------------------------------|------------------------------------------------------------------------------------------------------------------------------|------------------------------------------------------------------------------------------------------------------------------------------------------------------------------------------------------------------------------------------------------------------|
| Goel, Rakesh. MD       | 005200/029352                      | General Campus, 501 Smyth Road, Ottawa Ontario K1H 8L6 Canada.                                                               | Ottawa Hospital Research Ethics Board,<br>Ottawa Hospital, Civic Campus, 751 Parkdale Avenue, Suite 106, Ottawa, ON K 1 Y 117 Canada.<br><br>Chairperson- Raphael Saginur                                                                                        |
| Haider, Kamal-Uddin MD | 092020/030653                      | Saskatoon Cancer Centre, 20 Campus Drive, Saskatoon, SK S7N 4H4, Canada.                                                     | University of Saskatchewan BioMedical Research Ethics Board (Bio-REB) Research Ethics Office, University of Saskatchewan, NRC - Plant Biotechnology Research Institute, 1607 - 110 Gymnasium Place, Saskatoon, SK S7N 4J8 Canada.<br><br>Chairperson- Gord McKay |
| Haq, Rashida MD        | 087784/033423                      | Saint Michael's Hospital, Medical Day Care Clinic, 2nd floor, Queen wing, 30 Bond Street, Toronto, Ontario, M5B 1 W8 Canada. | Saint Michael's Hospital, Research Ethics Board, 30 Bond Street, Toronto, ON M5B 1 W8 Canada.<br><br>Chairperson- Bob Hyland.                                                                                                                                    |

**CONFIDENTIAL**

| <b>Investigator</b>   | <b>Investigator no./Center no.</b> | <b>Description of Research Facility, Hospital/ Institution, and Address</b>                                                | <b>Name of IEC/IRB Committee, Address, Committee Chair</b>                                                                                                                                                                                 |
|-----------------------|------------------------------------|----------------------------------------------------------------------------------------------------------------------------|--------------------------------------------------------------------------------------------------------------------------------------------------------------------------------------------------------------------------------------------|
| Krishnan, Mukta. MD   | 100095/032620                      | Royal Victoria Hospital, 201 Gcorgian Drive, Barrie, ON L4M 6M2, Canada.                                                   | The Reasearch Ethics Soard of the Royal Victoria Hospital, 201 Georgian Drive, Barrie. Ontario. L4M 6M2 Canada.<br><br>Chairperson- Laura Crook                                                                                            |
| Laing, Kara. MD       | 029623/034587                      | Dr, H. Bliss Murphy Cancer Centre, 300 Prince Philip Drive, St, John's, NL A1B 3V6 Canada.                                 | Human Investigation Committee Eastern Trust Building, 95 Bonaventure Avenue, Saint John's, NL, A1B 2X5 Canada.<br><br>Chairperson- Ban Younghusband.                                                                                       |
| Madarnas, Yolanda. MD | 028295/032618                      | Cancer Centre of Southeastern Ontario at Kingston General Hospital, 25 King Street West Kingston, Ontario, K7L 51'9 Canada | Queen's University Health Sciences and Affiliated Teaching Hospitals Research Ethics Board Office of Research Services Flemming Hall - Jemmett Wing, 99 University Ave Kingston, Ontario, K7L3N6 Canada.<br><br>Chairperson- Albert Clark. |

**CONFIDENTIAL**

| <b>Investigator</b> | <b>Investigator no./Center no.</b> | <b>Description of Research Facility, Hospital/ Institution, and Address</b>                                                              | <b>Name of IEC/IRB Committee, Address, Committee Chair</b>                                                                                                                                                                   |
|---------------------|------------------------------------|------------------------------------------------------------------------------------------------------------------------------------------|------------------------------------------------------------------------------------------------------------------------------------------------------------------------------------------------------------------------------|
| Miller, Wilson. MD  | 055728/029404                      | Sir Mortimer B. Davis - Jewish General Hospital, Clinical Research Unite, RM E: 872 3755 Cote St-Catherine, Montreal, QC H3T IE2 Canada. | S.M.B.D-Jewish General Hospital Research Ethics Committee, Sit Mortbner B. Davis - Jewish General Hospital, 3755 Chemin de la. Cote Ste Catherine, Rm: A-925, Montreal, QC H3T IE2 Canada.<br><br>Chairperson- Carolyn Ells. |
| Myers, Robert. MD   | 093553/029620                      | Credit Valley Hospital, Carlo Fidani Peel. Regional Cancer Centre, 2200 Bglinton Avenue West, Mississauga, Ontario, L5M 2N1 Canada.      | Credit Valley Hospital c/o Research Administration, Research Review Committee, 2200 Eglinton Avenue West Mississauga. ON L5M 2N1 Canada.<br><br>Chairperson- Connie Day.                                                     |
| Potvin, Kylea. MD   | 133136/046167                      | London Health Sciences CentreLondon Regional Cancer Program 790 Commissioner's Road E, Room A3-834 London, Ontario, N6A 4L6 Canada.      | Ontario Cancer Research Ethics Board, Ontario Institute Cancer Research Network MaRS Centre South Tower, 101 College Street, Suite 800, Toronto, Ontario, M5G 0A3 Canada.<br><br>Chairperson- Jack Holland.                  |

**CONFIDENTIAL**

| <b>Investigator</b>                                | <b>Investigator no./Center no.</b> | <b>Description of Research Facility, Hospital/ Institution, and Address</b>                                                              | <b>Name of IEC/IRB Committee, Address, Committee Chair</b>                                                                                                                                                               |
|----------------------------------------------------|------------------------------------|------------------------------------------------------------------------------------------------------------------------------------------|--------------------------------------------------------------------------------------------------------------------------------------------------------------------------------------------------------------------------|
| Provencher, Louise. MD                             | 007714/034451                      | Centre Hospitalier Affilie Universilaire de Quebec (CHA) Hopilal du Saint-Sacrement<br>1050 chemin Ste-Foy Quebec, DC, GIS 4L8<br>Canada | Comite d'ethique de la recherch  Centte<br>Hospitalier Affilie Universitaire de Quebec<br>(CHA) Hospital du Saint-Sacrement, 1050<br>chemin Ste-Foy, Quebec. QC, G1S 4LB<br>Canada.<br><br>Chairperson- Ana Marin.       |
| Bin, James. MD<br>Rahim, Yasmin. MD (Former<br>PI) | 186256/033424                      | Toronto East General Hospital 825 Coxwell A<br>venue, Toronto, Ontario, M4C 3E7 Canada.                                                  | Ontario Cancer Research Ethics Board,<br>Ontario Institute Cancer Research Network,<br>MaRS Centre South Tower, 101 College<br>Street. Suite 800, Toronto. Ontario, M5G 0A3<br>Canada.<br><br>Chairperson- Jack Holland. |
| Rayson, Daniel. MD                                 | 098006/031683                      | QEII Health Science Centre, Nova Scotia<br>Cancer Centre, 5820 University Avenue,<br>Halifax, NS B3H 1V7 Canada.                         | Capital District Health Authority Research<br>Ethics Board, QEII Centre for Clinical<br>Research, 5790 University Avenue, Room<br>118, Halifax, NS B3H 1V7 Canada.<br><br>Chairperson- Richard Hall.                     |

**CONFIDENTIAL**

| <b>Investigator</b>    | <b>Investigator no./Center no.</b> | <b>Description of Research Facility, Hospital/ Institution, and Address</b>                                        | <b>Name of IEC/IRB Committee, Address, Committee Chair</b>                                                                                                                                                  |
|------------------------|------------------------------------|--------------------------------------------------------------------------------------------------------------------|-------------------------------------------------------------------------------------------------------------------------------------------------------------------------------------------------------------|
| Sehdev, Sandeep        | 026463/029621                      | William Osler Health Centre, Brampton Memorial Hospital, 20 Lynch Street, Brampton, Ontario, L6W 2Z8 Canada.       | William Osler Health Centre. Brampton Memorial Hospital, 20 Lynch Street, Brampton, Ontario, L6W 2Z8 Canada.<br><br>Chairperson- Henry Blair.                                                               |
| Trudeau, Maureen. MD   | 030067/029622                      | Odette Cancer Centre, Sunnybrook Health Sciences Centre, 2075 Bayview Avenue, Toronto, Ontario, M4N 3M5 Canada.    | Research Ethics Board, Sunnybrook Health Sciences Centre, Room C819, 2075 Bayview Avenue, Toronto, Ontario M4N 3M5 Canada.<br><br>Chairperson- Philip Herbert.                                              |
| Vergidis, Dimitrios MD | 055711/032715                      | Thunder Bay Regional Health Science Centre, Regional cancer Care, 980 Oliver Road, Thunder Bay, ON P7B 6V8 Canada. | Ontario Cancer Research Ethics Board, Ontario Institute Cancer Research Network, MaRS Centre South Tower, 101 College Street. Suite 500, Toronto, Ontario M5G 1L7 Canada.<br><br>Chairperson- Jack Holland. |



**CONFIDENTIAL**

| <b>Investigator</b>    | <b>Investigator no./Center no.</b> | <b>Description of Research Facility, Hospital/ Institution, and Address</b>                                    | <b>Name of IEC/IRB Committee, Address, Committee Chair</b>                                                                                                                                                                                                                                      |
|------------------------|------------------------------------|----------------------------------------------------------------------------------------------------------------|-------------------------------------------------------------------------------------------------------------------------------------------------------------------------------------------------------------------------------------------------------------------------------------------------|
| <b>Chile</b>           |                                    |                                                                                                                |                                                                                                                                                                                                                                                                                                 |
| Gallardo, Jorge. MD    | 117838/039675                      | Instituto de Terapias Oncologicas Providencia, Drive Torres Boonan 520, Providencia, Santiago, 750-1088 Chile. | Comite Etico Cientifico, Servicio de Salud Metropolitano del Oriente, Av Salvador 384, provideneill. Santiago, 750-0922 Chile.<br><br>Chairperson: Dr. Andrés Stuardo                                                                                                                           |
| Giannini, Osvaldo. MD  | 093892/030020                      | Clinica Renaca, Anabaena 336, Vina del Mar, 254-0364 Chile.                                                    | Comite Etico Cientifico, Servicio de Salud Vina del Mar - Quillota, Av, Alvarez 1532, Vina del Mar, 254-0364, Chile.<br><br>Chairperson: Dr. Tulio Moreno Bolton.<br><br>Comite de Etica, Clinica Renaca, Anabaena 336, Vina del Mar, 254-0364, Chile.<br><br>Chairperson: Dr. Luis Bavestrello |
| Reyes, José Miguel. MD | 036315/029920                      | Clinica Las Condes, Lo Fonteolla 441, Las Condes -Santiago, 877-0126 Chile.                                    | Comite Etico Cientifico, Servicio de Salud Metropolitano Oriente, Av. Salvador 364,                                                                                                                                                                                                             |

**CONFIDENTIAL**

| Investigator       | Investigator no./Center no. | Description of Research Facility, Hospital/ Institution, and Address                                                        | Name of IEC/IRB Committee, Address, Committee Chair                                                                                                                                                               |
|--------------------|-----------------------------|-----------------------------------------------------------------------------------------------------------------------------|-------------------------------------------------------------------------------------------------------------------------------------------------------------------------------------------------------------------|
|                    |                             |                                                                                                                             | <p>750-0922, Santiago.</p> <p>Chairperson: Dr. Andrés Stuardo</p> <p>Comite de Etioa, Clinica Las Condes, Lo Fonteolla 441, Las Condes -Santiago, 877-0128, Chile.</p> <p>Chairperson: Armando Ortiz Pommier.</p> |
| Salman, Pamela. MD | 058834/029921               | Fundacion Arturo Lopez Perez Rancagua 878-Providencia, Santiago, 750-0921 Chile.                                            | <p>Comite Etico Cientifico, Servicio de salud Metropolitano del Oriente, Av. Salvador 364, Providencia, Santiago, 750-0922 Chile.</p> <p>Chairperson: Dr. Andrés Stuardo</p>                                      |
| <b>China</b>       |                             |                                                                                                                             |                                                                                                                                                                                                                   |
| Jiang, Zefei. MD   | 083838/035210               | The hospital affiliated to Military Medical Science Academy, No.8 East Road, Fengtai District, Beijing, 100071 P. R. China. | Ethics Committee of the Hospital affiliated to Military Medical, Science Academy, No.8 East Road, Fengtai District, Beijing 100071 P.                                                                             |

**CONFIDENTIAL**

| Investigator         | Investigator no./Center no. | Description of Research Facility, Hospital/ Institution, and Address                             | Name of IEC/IRB Committee, Address, Committee Chair                                                                                                       |
|----------------------|-----------------------------|--------------------------------------------------------------------------------------------------|-----------------------------------------------------------------------------------------------------------------------------------------------------------|
|                      |                             |                                                                                                  | <p>R. China.</p> <p>Chairperson: Yuezhong He</p>                                                                                                          |
| Liu, Donggeng. MD    | 087321/035200               | Sun Yat-Sen University Cancer Center, 651 Dongfeng Eastern Road, Guangzhou, 510060 China.        | <p>Ethics Committee of Sun Yat-Sen University Cancer Center, 651 Dongfeng Eastern Road, Guangzhou, 510060 China.</p> <p>Chairperson: Wangqing Peng</p>    |
| Shen, Zhenzhou. MD   | 083832/035211               | Cancer Hospital affiliated to Fudan university, 270 Dong An Road, Shanghai 200032 P.R.China.     | <p>Ethics Committee of Cancer Hospital affiliated to Fudan university, 270 Dong An Road, Shanghai 200032 P.R.China.</p> <p>Chairperson: Jiong Wu.</p>     |
| Tong, Zhongsheng. MD | 083837/035202               | Tianjin Cancer Hospital, Huan, Huxi Road, Ti Yuan Bei Hexi District, Tianjing 300060, P.R.China. | <p>Ethics Committee of Tianjin Cancer Hospital, Huan, Huxi Road, Ti Yuan Bei Hexi District, Tianjing 300060 P.R.China.</p> <p>Chairperson: Ping Wang.</p> |

**CONFIDENTIAL**

| <b>Investigator</b>  | <b>Investigator no./Center no.</b> | <b>Description of Research Facility, Hospital/ Institution, and Address</b>                                                              | <b>Name of IEC/IRB Committee, Address, Committee Chair</b>                                                                                                                                         |
|----------------------|------------------------------------|------------------------------------------------------------------------------------------------------------------------------------------|----------------------------------------------------------------------------------------------------------------------------------------------------------------------------------------------------|
| Wang, Yongsheng. MD  | 113190/049773                      | The Cancer Hospital of Shandong Province, 440 Jiyan Road, Jinan, Shandong 25011 7 P.R.China                                              | Ethics Committee of The Cancer Hospital of Shandong Province, 440Jiyan Road, Jinan, Shandong 25011 7 P.R.China.<br><br>Chairperson: Jinming Yu.                                                    |
| Xu, Binghe. MD, Ph.D | 083840/035201                      | Cancer Hospital, CAMS&PUMC, 17 Pan Jia Yuan Nan Li, Chaoyang District, Beijing 100021 P.R.China.                                         | Ethics Committee of Cancer Hospital, CAMS&PUMC, 17 Pan Jia Yuan Nan Li, Chaoyang District, Beijing 100021 P.R.China.<br><br>Chairperson: Datong Chu.                                               |
| Yu, Shiyong. MD      | 098501/035209                      | Huazhong University of Science and Technology Tongji Medical College Tongji Hospital 1095 Jie Fang DaDao, Wuhan, Hubei 430030 P.R.China. | Ethics Com mit tee of Huazhong University of Science and Technology Tongji Medical College Tongj i Hospital, 1095 Jie Fang DaDao, Wuhan, Hubei 430030 P.R.China.<br><br>Chairperson: Fandian Zeng. |

**CONFIDENTIAL**

| <b>Investigator</b>      | <b>Investigator no./Center no.</b> | <b>Description of Research Facility, Hospital/ Institution, and Address</b> | <b>Name of IEC/IRB Committee, Address, Committee Chair</b>                                                                                                                                                                                                                                                                                                                                                                 |
|--------------------------|------------------------------------|-----------------------------------------------------------------------------|----------------------------------------------------------------------------------------------------------------------------------------------------------------------------------------------------------------------------------------------------------------------------------------------------------------------------------------------------------------------------------------------------------------------------|
| <b>Croatia</b>           |                                    |                                                                             |                                                                                                                                                                                                                                                                                                                                                                                                                            |
| Grgic, Mislav. MD        | 049347/032301                      | KBC Zagreb, Klinika za onkologiju, Kispaticeva 12, Zagreb, 10000 Croatia.   | <p>Sredisnje eticko povjerenstvo za lijekove i medicinske proizvode, Ulica Roberta Frangeša Mihanovića 9, Zagreb, 10 000 Croatia.</p> <p>Chairperson- Prof.dr.sc.Dinko Vitezić, dr.med.</p> <p>Ministarstvo zdravstva Republike Hrvatske; Uprava za stručno-medicinske poslove, Odijel za lijekove; Ulica Roberta Frangeša Mihanovića 9, Zagreb, 10 000 Croatia.</p> <p>Chairperson- Prof.dr.sc.Rajko Ostojić, dr.med.</p> |
| Kotromanović, Zdenka. MD | 082641/032304                      | KB Osijek, Odjel za onkologiju, Huttlerova 4, Osijek, 31000 Croatia.        | Sredisnje eticko povjerenstvo za lijekove i medicinske proizvode, Ulica Roberta                                                                                                                                                                                                                                                                                                                                            |

**CONFIDENTIAL**

| <b>Investigator</b> | <b>Investigator no./Center no.</b> | <b>Description of Research Facility, Hospital/ Institution, and Address</b> | <b>Name of IEC/IRB Committee, Address, Committee Chair</b>                                                                                                                                                                                                                                                                                   |
|---------------------|------------------------------------|-----------------------------------------------------------------------------|----------------------------------------------------------------------------------------------------------------------------------------------------------------------------------------------------------------------------------------------------------------------------------------------------------------------------------------------|
|                     |                                    |                                                                             | <p>Frangeša Mihanovića 9, Zagreb, 10 000 Croatia.</p> <p>Chairperson- Prof.dr.sc.Dinko Vitezić, dr.med.</p> <p>Ministarstvo zdravstva Republike Hrvatske; Uprava za stručno-medicinske poslove, Odijel za lijekove; Ulica Roberta Frangeša Mihanovića 9, 10 000 Zagreb, Croatia.</p> <p>Chairperson- Prof. dr.sc. Rajko Ostojić, dr.med.</p> |

**CONFIDENTIAL**

| <b>Investigator</b>                                     | <b>Investigator no./Center no.</b> | <b>Description of Research Facility, Hospital/ Institution, and Address</b>             | <b>Name of IEC/IRB Committee, Address, Committee Chair</b>                                                                                                                                                                                                                                                                                                                                                                  |
|---------------------------------------------------------|------------------------------------|-----------------------------------------------------------------------------------------|-----------------------------------------------------------------------------------------------------------------------------------------------------------------------------------------------------------------------------------------------------------------------------------------------------------------------------------------------------------------------------------------------------------------------------|
| Pavlović Ružić, Ira. MD                                 | 098639/032302                      | KBC Rijeka, Zavod za radioterapiju i onkologiju, KreCimirava 42, Rijeka, 51000 Croatia. | <p>Sredisnje eticko povjerenstvo za lijekove i rnedicinske proizvode, Ulica Roberta Frangeša Mihanovića 9, Zagreb, 10 000 Croatia.</p> <p>Chairperson- Prof.dr.sc.Dinko Vitezić, dr.med.</p> <p>Ministarstvo zdravstva Republike Hrvatske; Uprava za stručno-medicinske poslove, Odijel za lijekove; Ulica Roberta Frangeša Mihanovića 9, 10 000 Zagreb, Croatia.</p> <p>Chairperson- Prof.dr.sc.Rajko Ostojić, dr.med.</p> |
| Radolović, Liliana. MD<br>Bozac, Mario. MD. (Former PI) | 114353/032303                      | OB Pula, Djelatnost za unutarnje bolesti, Negrijeva 6, Pula, 52000 Croatia.             | <p>Sredisnje eticko povjerenstvo za lijekove i rnedicinske proizvode, Ulica Roberta Frangeša Mihanovića 9, Zagreb, 10 000 Croatia.</p>                                                                                                                                                                                                                                                                                      |

**CONFIDENTIAL**

| Investigator     | Investigator no./Center no. | Description of Research Facility, Hospital/ Institution, and Address | Name of IEC/IRB Committee, Address, Committee Chair                                                                                                                                                                                                                                  |
|------------------|-----------------------------|----------------------------------------------------------------------|--------------------------------------------------------------------------------------------------------------------------------------------------------------------------------------------------------------------------------------------------------------------------------------|
|                  |                             |                                                                      | <p>Chairperson- Prof.dr.sc.Dinko Vitezić, dr.med.</p> <p>Ministarstvo zdravstva Republike Hrvatske; Uprava za stručno-medicinske poslove, Odijel za lijekove; Ulica Roberta Frangeša Mihanovića 9, Zagreb, 10 000 Croatia.</p> <p>Chairperson- Prof.dr.sc.Rajko Ostojić, dr.med.</p> |
| Vrdoljak, Eduard | 030301/032299               | KB Split, Centar za onkologiju Spinciceva 1, Split, 21000 Croatia.   | <p>Sredisnje eticko povjerenstvo za lijekove i medicinske proizvode, Ulica Roberta Frangeša Mihanovića 9, Zagreb, 10 000 Croatia.</p> <p>Chairperson- Prof.dr.sc.Dinko Vitezić, dr.med.</p>                                                                                          |



**CONFIDENTIAL**

| <b>Investigator</b>     | <b>Investigator no./Center no.</b> | <b>Description of Research Facility, Hospital/ Institution, and Address</b>    | <b>Name of IEC/IRB Committee, Address, Committee Chair</b>                                                                                                                                                                                                                                                 |
|-------------------------|------------------------------------|--------------------------------------------------------------------------------|------------------------------------------------------------------------------------------------------------------------------------------------------------------------------------------------------------------------------------------------------------------------------------------------------------|
|                         |                                    |                                                                                | Ministarstvo zdravstva Republike Hrvatske;<br>Uprava za stručno-medicinske poslove, Odijel<br>za lijekove; Ulica Roberta Frangeša<br>Mihanovića 9, 10 000 Zagreb, Croatia.<br>Chairperson- Prof.dr.sc.Rajko Ostojić,<br>dr.med.                                                                            |
| <b>Czech Republic</b>   |                                    |                                                                                |                                                                                                                                                                                                                                                                                                            |
| Petrakova, Katarina. MD | 054796/031062                      | Masaryk Memorial Cancer Institute, Zlutý kopec 7, Brno, 656 53 Czech Republic. | Multicenter Ethics Committee of General<br>Faculty Hospital, Na Bojisti 1, Prague 2, 128<br>08 Czech Republic.<br><br>Chairperson- Josef Sedivy, MD<br><br>Ethics Committee of Masaryk Memorial<br>Cancer Institute, Zlutý kopec 7, Brno, 656 53<br>Czech Republic.<br><br>Chairperson- Oldrich Coufal, MD |

**CONFIDENTIAL**

| <b>Investigator</b>      | <b>Investigator no./Center no.</b> | <b>Description of Research Facility, Hospital/ Institution, and Address</b>                                  | <b>Name of IEC/IRB Committee, Address, Committee Chair</b>                                                                                                                                                                                                                         |
|--------------------------|------------------------------------|--------------------------------------------------------------------------------------------------------------|------------------------------------------------------------------------------------------------------------------------------------------------------------------------------------------------------------------------------------------------------------------------------------|
| Petruzelka, Lubos. MD    | 000638/031065                      | Teaching Health Centre, Karlovo namesti 32, Prague 2, 12100 Czech Republic.                                  | Multicenter Ethics Committee of General Faculty Hospital, Na Bojisti 1, Prague 2, 12808 Czech Republic.<br><br>Chairperson- Josef Sedivy, MD                                                                                                                                       |
| Stahalova, Vladimira. MD |                                    | Institute of radiation oncology, Faculty Hospital Bulovka, Na Truhlarce 100, Prague 8, 18000 Czech Republic. | Multicenter Ethics Committee of General Faculty Hospital, Na Bojisti 1, Prague 2, 12808 Czech Republic.<br><br>Chairperson- Josef Sedivy, MD<br><br>Ethics Committee of Faculty Hospital Bulovka, Budinova 2, Prague 8, 18081 Czech Republic.<br><br>Chairperson- Michal Holub, MD |

**CONFIDENTIAL**

| <b>Investigator</b>           | <b>Investigator no./Center no.</b> | <b>Description of Research Facility, Hospital/ Institution, and Address</b>               | <b>Name of IEC/IRB Committee, Address, Committee Chair</b>                                                                                                     |
|-------------------------------|------------------------------------|-------------------------------------------------------------------------------------------|----------------------------------------------------------------------------------------------------------------------------------------------------------------|
| <b>Denmark</b>                |                                    |                                                                                           |                                                                                                                                                                |
| Jakobsen, Erik Hugger. MD     | 035503/035011                      | Department of Oncology, Vejle Sygehus, Kabbeltoft 25, Vejle, DK-7100 Denmark.             | Den Videnskabsetiske Komite for Region Syddanmark, Odense Universitetshospita Kløvervaenget 10, 2. Odense C, 5000 Denmark.<br><br>Chairperson- Birger Møller.  |
| Jensen, Brita Bjerregaard. MD | 098406/031908                      | Onkologisk Klinik, Sydvestjysk Sygehus Esbjerg, Finsensgade 35, Esbjerg, 6700 Denmark.    | Den Videnskabsetiske Komite for Region Syddanmark, Odense Universitetshospital Kløvervaenget 10, 2. Odense C, 5000 Denmark.<br><br>Chairperson- Birger Møller. |
| Knoop, Ann. MD                | 044605/031789                      | Onkologisk afdeling, Odense Universitetshospita, Sdr. Boulevard 29, Odense, 5000 Denmark. | Den Videnskabsetiske Komite for Region Syddanmark, Odense Universitetshospital Kløvervaenget 10, 2. Odense C, 5000 Denmark.<br><br>Chairperson- Birger Møller. |

**CONFIDENTIAL**

| <b>Investigator</b>                                      | <b>Investigator no./Center no.</b> | <b>Description of Research Facility, Hospital/ Institution, and Address</b>                                     | <b>Name of IEC/IRB Committee, Address, Committee Chair</b>                                                                                                    |
|----------------------------------------------------------|------------------------------------|-----------------------------------------------------------------------------------------------------------------|---------------------------------------------------------------------------------------------------------------------------------------------------------------|
| Philip, Preben. MD                                       | 035495/050678                      | Naestved sygehus, Department of Oncology/Hematology, Ringstedgade 61, Naestved, DK-4700 Denmark.                | Den Videnskabetiske Komite for Region Syddanmark, Odense Universitetshospital Kløvervaenget 10, 2. Odense C, 5000 Denmark.<br><br>Chairperson- Birger Møller. |
| Stenbygaard, Lars. MD<br>Ewertz, Marianne.MD (Former PI) | 049468/031793                      | Onkologisk Afdeling, Aalborg Sygehus Syd, Hobrovej 18-22, Aalborg, DK-9100 Denmark.                             | Den Videnskabetiske Komite for Region Syddanmark, Odense Universitetshospital Kløvervaenget 10, 2. Odense C, 5000 Denmark.<br><br>Chairperson- Birger Møller. |
| Tange, Ulla. MD                                          | 050122/031791                      | The Finsen Center Rigshospitalet, Copenhagen University Hospital, Blegdamsvej 9, Copenhagen ø, DK-2100 Denmark. | Den Videnskabetiske Komite for Region Syddanmark, Odense Universitetshospital Kløvervaenget 10, 2. Odense C, 5000 Denmark.<br><br>Chairperson- Birger Møller. |

**CONFIDENTIAL**

| <b>Investigator</b>                                    | <b>Investigator no./Center no.</b> | <b>Description of Research Facility, Hospital/ Institution, and Address</b>                                                                         | <b>Name of IEC/IRB Committee, Address, Committee Chair</b>                                                                                                   |
|--------------------------------------------------------|------------------------------------|-----------------------------------------------------------------------------------------------------------------------------------------------------|--------------------------------------------------------------------------------------------------------------------------------------------------------------|
| Tuxen, Gosia. MD                                       | 104189/043379                      | Herlev Hospital, Department of Oncology, Herlev Ringvej 75, Herlev, DK- 2730 Denmark.                                                               | Den Videnskabetiske Komite for Region Syddanmark, Odense Universitetshospital Kløvervænget 10, 2. Odense C, 5000 Denmark.<br><br>Chairperson- Birger Møller. |
| Vestlev, Peter. MD.<br>Sorensen, Peter. MD (Former PI) | 035969/031794                      | Department of Oncology and Haematology, Roskilde Hospital, Kogevej 7-13, Roskilde, DK- 4000 Denmark.                                                | Den Videnskabetiske Komite for Region Syddanmark, Odense Universitetshospital Kløvervænget 10, 2. Odense C, 5000 Denmark.<br><br>Chairperson- Birger Møller. |
| <b>France</b>                                          |                                    |                                                                                                                                                     |                                                                                                                                                              |
| Audhuy, Bruno. MD                                      | 002585/031237                      | Hopital Pasteur - Hopitaux civils Colmar, Service d'Onco-Hematologie et Immunologie Clinique 39, avenue de la Liberte, Colmar Cedex, 68 024 France. | CPP de Lyon Sud-Est IV, Centre Leon Berard 28 rue Laennec, Lyon cedex 08, 69373 France.<br><br>Chairperson- Daniel Espinouse, MD.                            |

**CONFIDENTIAL**

| <b>Investigator</b>     | <b>Investigator no./Center no.</b> | <b>Description of Research Facility, Hospital/ Institution, and Address</b>                                                | <b>Name of IEC/IRB Committee, Address, Committee Chair</b>                                                                           |
|-------------------------|------------------------------------|----------------------------------------------------------------------------------------------------------------------------|--------------------------------------------------------------------------------------------------------------------------------------|
| Bachelot, Thomas. MD    | 037302/032615                      | Departement de Cancerologie Medicale, Centre Leon Berard, 28 rue Laennec, Lyon cedex 08, 69373 France.                     | CPP de Lyon Sud-Est IV, Centre Leon Berard<br>28 rue Laennec, Lyon cedex 08, 69373 France.<br><br>Chairperson- Daniel Espinouse, MD. |
| Blay, Jean-Yves.        | 060439/031331                      | Hopital Edouard Herriot, Pavillion E- Oncologie medicale 5 Place d'Arsonval, 69437 Lyon cedex 03, France.                  | CPP de Lyon Sud-Est IV, Centre Leon Berard<br>28 rue Laennec, Lyon cedex 08, 69373 France.<br><br>Chairperson- Daniel Espinouse, MD. |
| Bonneterre, Jacques. MD | 062011/035069                      | Centre Oscar Lambret 3, rue Frederic Combemale, B.P. 307-59020 Lille, France.                                              | CPP de Lyon Sud-Est IV, Centre Leon Berard<br>28 rue Laennec, Lyon cedex 08, 69373 France.<br><br>Chairperson- Daniel Espinouse, MD. |
| Campone, Mario. MD      | 037298/031274                      | Centre Rene Gauducheau (CRLCC Nantes), Service d'oncologie Medicale, Boulevard Jacques Monod, Saint Herblain cedex, 44 805 | CPP de Lyon Sud-Est IV, Centre Leon Berard<br>28 rue Laennec, Lyon cedex 08, 69373 France.                                           |

**CONFIDENTIAL**

| <b>Investigator</b>     | <b>Investigator no./Center no.</b> | <b>Description of Research Facility, Hospital/ Institution, and Address</b>                                                         | <b>Name of IEC/IRB Committee, Address, Committee Chair</b>                                                                              |
|-------------------------|------------------------------------|-------------------------------------------------------------------------------------------------------------------------------------|-----------------------------------------------------------------------------------------------------------------------------------------|
|                         |                                    | France.                                                                                                                             | Chairperson- Daniel Espinouse, MD.                                                                                                      |
| Chevelle, Christian. MD | 104607/ 037958                     | Centre des Hautes Energies 6, rue Maspoul<br>Toulouse, 31400 France.                                                                | CPP de Lyon Sud-Est IV, Centre Leon Berard<br>28 rue Laennec, Lyon cedex 08, 69373<br>France.<br><br>Chairperson- Daniel Espinouse, MD. |
| Chollet, Philippe. MD   | 086028/ 030863                     | CAC Jean Perrin, 58 rue Montalembert,<br>Clermot-Ferrand, 63 000 France.                                                            | CPP de Lyon Sud-Est IV, Centre Leon Berard<br>28 rue Laennec, Lyon cedex 08, 69373<br>France.<br><br>Chairperson- Daniel Espinouse, MD. |
| Coudert, Bruno. MD      | 004637/ 031292                     | CRLCC Georges Francois Lecierc, Service<br>d'Oncologie Medicale 1, rue du Proffesseur<br>Marion-BP 77980 21079 Dijon cedex, France. | CPP de Lyon Sud-Est IV, Centre Leon Berard<br>28 rue Laennec, Lyon cedex 08, 69373<br>France.<br><br>Chairperson- Daniel Espinouse, MD. |

**CONFIDENTIAL**

| <b>Investigator</b>      | <b>Investigator no./Center no.</b> | <b>Description of Research Facility, Hospital/ Institution, and Address</b>                 | <b>Name of IEC/IRB Committee, Address, Committee Chair</b>                                                                           |
|--------------------------|------------------------------------|---------------------------------------------------------------------------------------------|--------------------------------------------------------------------------------------------------------------------------------------|
| Delaloge, Suzette. MD    | 055396/030530                      | IGR, 39 rue Camille Desmoulins, Villejuif cedex, 94805 France.                              | CPP de Lyon Sud-Est IV, Centre Leon Berard<br>28 rue Laennec, Lyon cedex 08, 69373 France.<br><br>Chairperson- Daniel Espinouse, MD. |
| Delva, Remy. MD          | 001234/031227                      | Centre Paul Papin, Service d'oncologie Medical, 2 rue Moll, Angers cedex 1, 49033 France.   | CPP de Lyon Sud-Est IV, Centre Leon Berard<br>28 rue Laennec, Lyon cedex 08, 69373 France.<br><br>Chairperson- Daniel Espinouse, MD. |
| Dourthe, Louis-Marie. MD | 097457/033333                      | Cabinet d'Oncologie, 39 allée de la Robertsau, Strasbourg, 67 000 France.                   | CPP de Lyon Sud-Est IV, Centre Leon Berard<br>28 rue Laennec, Lyon cedex 08, 69373 France.<br><br>Chairperson- Daniel Espinouse, MD. |
| Extra, Jean-Marc         | 099019/032207                      | Institut Paoli Calmette, 232, boulevard Sainte Marguerite, BP 156, Marseille, 13273 France. | CPP de Lyon Sud-Est IV, Centre Leon Berard<br>28 rue Laennec, Lyon cedex 08, 69373 France.                                           |



**CONFIDENTIAL**

| <b>Investigator</b>    | <b>Investigator no./Center no.</b> | <b>Description of Research Facility, Hospital/ Institution, and Address</b>                         | <b>Name of IEC/IRB Committee, Address, Committee Chair</b>                                                                              |
|------------------------|------------------------------------|-----------------------------------------------------------------------------------------------------|-----------------------------------------------------------------------------------------------------------------------------------------|
|                        |                                    |                                                                                                     | Chairperson- Daniel Espinouse, MD.                                                                                                      |
| Facchini, Thomas. MD   | 096551/031058                      | Polyclinique Courlancy, 38 rue de Courlancy, Reims, 51100 France.                                   | CPP de Lyon Sud-Est IV, Centre Leon Berard<br>28 rue Laennec, Lyon cedex 08, 69373<br>France.<br><br>Chairperson- Daniel Espinouse, MD. |
| Ferrero, Jean-Marc. MD | 040632/032507                      | Service d'Oncologie Medicale, CAC Antoine Lacassagne 33, avenue de Vatombrrose, Nice, 06189 France. | CPP de Lyon Sud-Est IV, Centre Leon Berard<br>28 rue Laennec, Lyon cedex 08, 69373<br>France.<br><br>Chairperson- Daniel Espinouse, MD. |
| Gutierrez, Maya. MD    | 052996/030635                      | Centre Rene Hugenin, 35 r Daily, Saint Cloud, 92210 France.                                         | CPP de Lyon Sud-Est IV, Centre Leon Berard<br>28 rue Laennec, Lyon cedex 08, 69373<br>France.<br><br>Chairperson- Daniel Espinouse, MD. |

**CONFIDENTIAL**

| <b>Investigator</b>                                       | <b>Investigator no./Center no.</b> | <b>Description of Research Facility, Hospital/ Institution, and Address</b>                                                               | <b>Name of IEC/IRB Committee, Address, Committee Chair</b>                                                                           |
|-----------------------------------------------------------|------------------------------------|-------------------------------------------------------------------------------------------------------------------------------------------|--------------------------------------------------------------------------------------------------------------------------------------|
| Jaubert, Dominique. MD                                    | 096651/031139                      | Clinique Tivoli, 220 rue Mandron, Bordeaux, 33000 France.                                                                                 | CPP de Lyon Sud-Est IV, Centre Leon Berard<br>28 rue Laennec, Lyon cedex 08, 69373 France.<br><br>Chairperson- Daniel Espinouse, MD. |
| Kerbrat, Pierre.MD                                        | 096957/031284                      | Centre Eugene Marquis (CRLCC Rennes)<br>Oncologie Medicale, Rue de la Bataille<br>Flandres-Dunkerque-CS 44229 35042 Rennes cedex, France. | CPP de Lyon Sud-Est IV, Centre Leon Berard<br>28 rue Laennec, Lyon cedex 08, 69373 France.<br><br>Chairperson- Daniel Espinouse, MD. |
| Levy, Christelle. MD.<br>Delozier, Thierry.MD (Former PI) | 050817/031239                      | CRLCC Francois Baclesse, Comite<br>Pathologies Mammaries, Avenue du general<br>Harris, BP 5026, 14076 Caen cedex 05,<br>France.           | CPP de Lyon Sud-Est IV, Centre Leon Berard<br>28 rue Laennec, Lyon cedex 08, 69373 France.<br><br>Chairperson- Daniel Espinouse, MD. |
| Lortholary, Alain.MD                                      | 067974/031565                      | Clinique Catherine de Sienne, Service de<br>Cancerologie, 2 rue Eric Tabarly- BP 20215,<br>44202 Nantes cedex 2, France.                  | CPP de Lyon Sud-Est IV, Centre Leon Berard<br>28 rue Laennec, Lyon cedex 08, 69373 France.                                           |

**CONFIDENTIAL**

| <b>Investigator</b>     | <b>Investigator no./Center no.</b> | <b>Description of Research Facility, Hospital/ Institution, and Address</b>                                        | <b>Name of IEC/IRB Committee, Address, Committee Chair</b>                                                                           |
|-------------------------|------------------------------------|--------------------------------------------------------------------------------------------------------------------|--------------------------------------------------------------------------------------------------------------------------------------|
|                         |                                    |                                                                                                                    | Chairperson- Daniel Espinouse, MD.                                                                                                   |
| Luporsi, Elisabeth. MD  | 050378/045545                      | CRLCC Alexis Vautrin, Service Medecine Oncologique, Avenue de Bourgogne, 54511 Vandoeuvre-Les-Nancy, France.       | CPP de Lyon Sud-Est IV, Centre Leon Berard<br>28 rue Laennec, Lyon cedex 08, 69373 France.<br><br>Chairperson- Daniel Espinouse, MD. |
| Machover, David. MD     | 105250/ 032346                     | Hopital Paul Brousse, Service Oncologie Medicale 12, avenue Paul-Vaillant-Couturier, 94000 Villejuif, France.      | CPP de Lyon Sud-Est IV, Centre Leon Berard<br>28 rue Laennec, Lyon cedex 08, 69373 France.<br><br>Chairperson- Daniel Espinouse, MD. |
| Medionio, Jacques. MD   | 062009/030634                      | Hopital European Georges Pompidou, Service de cancerologie Medicale, 20 rue Leblanc, Paris Cedex 15, 75908 France. | CPP de Lyon Sud-Est IV, Centre Leon Berard<br>28 rue Laennec, Lyon cedex 08, 69373 France.<br><br>Chairperson- Daniel Espinouse, MD. |
| Miglianico, Laurent. MD | 096958/031285                      | Centre hospitalier prive Saint Gregoire, 6 bvd                                                                     | CPP de Lyon Sud-Est IV, Centre Leon Berard                                                                                           |

**CONFIDENTIAL**

| <b>Investigator</b>   | <b>Investigator no./Center no.</b> | <b>Description of Research Facility, Hospital/ Institution, and Address</b>                                                            | <b>Name of IEC/IRB Committee, Address, Committee Chair</b>                                                                           |
|-----------------------|------------------------------------|----------------------------------------------------------------------------------------------------------------------------------------|--------------------------------------------------------------------------------------------------------------------------------------|
|                       |                                    | Boutiere- CS 56816, Saint Gregoire, 35768 France.                                                                                      | 28 rue Laennec, Lyon cedex 08, 69373 France.<br><br>Chairperson- Daniel Espinouse, MD.                                               |
| Monnier, Alain.MD     | 097837/031616                      | Le Mittan, Boulevard do Marechal Juin, Montbeliard, 25 200 France.                                                                     | CPP de Lyon Sud-Est IV, Centre Leon Berard<br>28 rue Laennec, Lyon cedex 08, 69373 France.<br><br>Chairperson- Daniel Espinouse, MD. |
| Pivot, Xavier.MD      | 049858/031290                      | Service d'Oncologie, CHU Besancon, 3 boulevard Fleming, Besancon, 25030 France.                                                        | CPP de Lyon Sud-Est IV, Centre Leon Berard<br>28 rue Laennec, Lyon cedex 08, 69373 France.<br><br>Chairperson- Daniel Espinouse, MD. |
| Rimailho, Jacques. MD | 053292/ 036990                     | Service de Chirurgie Gynecologique, Bat H2 7eme etage CHU de Ranguel 1, avenue Jean Poulhes TSA 50032, Toulouse cedex 9, 31059 France. | CPP de Lyon Sud-Est IV, Centre Leon Berard<br>28 rue Laennec, Lyon cedex 08, 69373 France.                                           |

**CONFIDENTIAL**

| <b>Investigator</b>           | <b>Investigator no./Center no.</b> | <b>Description of Research Facility, Hospital/ Institution, and Address</b>                                        | <b>Name of IEC/IRB Committee, Address, Committee Chair</b>                                                                           |
|-------------------------------|------------------------------------|--------------------------------------------------------------------------------------------------------------------|--------------------------------------------------------------------------------------------------------------------------------------|
|                               |                                    |                                                                                                                    | Chairperson- Daniel Espinouse, MD.                                                                                                   |
| Rohart de Cordoue, Sylvie. MD | 103568/034223                      | Centre Bourgogne Service Oncologie Medicale, 144 avenue de Dunkerque, Lille, 59 000 France.                        | CPP de Lyon Sud-Est IV, Centre Leon Berard<br>28 rue Laennec, Lyon cedex 08, 69373 France.<br><br>Chairperson- Daniel Espinouse, MD. |
| Romieu, Gilles. MD            | 044034/033776                      | CRLCC Val d'Aurelle Paul Lamarque, 326 rue des Apothicaires, Parc Euromedecine, Montpellier cedex 5, 34298 France. | CPP de Lyon Sud-Est IV, Centre Leon Berard<br>28 rue Laennec, Lyon cedex 08, 69373 France.<br><br>Chairperson- Daniel Espinouse, MD. |
| Rouverand, Nicole. MD         | 099238/032313                      | Clinique de la Victorie Service d'Oncologie 1, Quai du Havre, Tourcoing, 59200 France.                             | CPP de Lyon Sud-Est IV, Centre Leon Berard<br>28 rue Laennec, Lyon cedex 08, 69373 France.                                           |

**CONFIDENTIAL**

| <b>Investigator</b>     | <b>Investigator no./Center no.</b> | <b>Description of Research Facility, Hospital/ Institution, and Address</b>                                                                    | <b>Name of IEC/IRB Committee, Address, Committee Chair</b>                                                                                                                                                                                       |
|-------------------------|------------------------------------|------------------------------------------------------------------------------------------------------------------------------------------------|--------------------------------------------------------------------------------------------------------------------------------------------------------------------------------------------------------------------------------------------------|
|                         |                                    |                                                                                                                                                | Chairperson- Daniel Espinouse, MD.                                                                                                                                                                                                               |
| <b>Germany</b>          |                                    |                                                                                                                                                |                                                                                                                                                                                                                                                  |
| Abenhardt, Wolfgang*    | 049379/030349                      | Dr. Med Wolfgang Abenhardt<br>Gemeinschaftspraxis, Haematologie und<br>internistische Onkologie, Prielmayerstr. 1,<br>Muenchen, 80335 Germany. | Ethik-Kommission der Med. Fakultaeet der<br>LMU Muenchen, Prof. Dr. med. Gustav<br>Paumgartner, Klinikum der Universitaet<br>Grosshadern Marchioninistreet 15,<br>Muenchen, 81377 Germany.<br><br>Chairperson- Prof. Dr. Wolfgang<br>Eisenmenger |
| Augustin, Doris. Dr.med | 109171/039149                      | Dr. med. Doris Audustin, Klinikum Deggendorf,<br>Mammazentrum Perlasber Street. 41,<br>Deggendorf, 94469 Germany.                              | Ethik-Kommission der Med. Fakultaeet der<br>LMU Muenchen, Prof. Dr. med. Gustav<br>Paumgartner, Klinikum der Universitaet<br>Grosshadern Marchioninistreet 15,<br>Muenchen, 81377 Germany.<br><br>Chairperson- Prof. Dr. Wolfgang<br>Eisenmenger |

**CONFIDENTIAL**

| <b>Investigator</b>                                                   | <b>Investigator no./Center no.</b> | <b>Description of Research Facility, Hospital/ Institution, and Address</b>                                                                                                             | <b>Name of IEC/IRB Committee, Address, Committee Chair</b>                                                                                                                                                                       |
|-----------------------------------------------------------------------|------------------------------------|-----------------------------------------------------------------------------------------------------------------------------------------------------------------------------------------|----------------------------------------------------------------------------------------------------------------------------------------------------------------------------------------------------------------------------------|
| Bauerfeind, Ingo. Dr.med*                                             | 098188/031944                      | Dr. med. Ingo Bauerfeind, Klinikum der Universitaet Muenchen – Grosshadern, Klinik und Poliklinik fuer, Frauenheilkunde und Geburtshilfe Marchioninistreet 15, Muenchen, 81377 Germany. | Ethik-Kommission der Med. Fakultaat der LMU Muenchen, Prof. Dr. med. Gustav Paumgartner, Klinikum der Universitaet Grosshadern Marchioninistreet 15, Muenchen, 81377 Germany.<br><br>Chairperson- Prof. Dr. Wolfgang Eisenmenger |
| Bechtner, Christina. Dr.med<br>Maerz, Wolfgang. Dr.med<br>(Former PI) | 012998//030416                     | Dr. med. Christina Benchtner Klinikum Memmingen, Bismarckstr. 23, Memmingen, 87700 Germany.                                                                                             | Ethik-Kommission der Med. Fakultaat der LMU Muenchen, Prof. Dr. med. Gustav Paumgartner, Klinikum der Universitaet Grosshadern Marchioninistreet 15, Muenchen, 81377 Germany.<br><br>Chairperson- Prof. Dr. Wolfgang Eisenmenger |
| Beha, Michaela. Dr.med                                                | 098190/031946                      | Dr. med. Michaela Beha, Klinikum Saint. Marien Amberg Brustzentrum Amberg,                                                                                                              | Ethik-Kommission der Med. Fakultaat der LMU Muenchen, Prof. Dr. med. Gustav                                                                                                                                                      |

**CONFIDENTIAL**

| <b>Investigator</b>       | <b>Investigator no./Center no.</b> | <b>Description of Research Facility, Hospital/ Institution, and Address</b>                                               | <b>Name of IEC/IRB Committee, Address, Committee Chair</b>                                                                                                                                                                        |
|---------------------------|------------------------------------|---------------------------------------------------------------------------------------------------------------------------|-----------------------------------------------------------------------------------------------------------------------------------------------------------------------------------------------------------------------------------|
|                           |                                    | Mariahilfbergweg 5-7, Amberg, 92224 Germany.                                                                              | Paumgartner, Klinikum der Universitaet Grosshadern Marchioninistreet 15, Muenchen, 81377 Germany.<br><br>Chairperson- Prof. Dr. Wolfgang Eisenmenger                                                                              |
| Beldermann, Frank. Dr.med | 091040/030351                      | Dr. med. Frank Beldermann<br>Gemeinschaftapaxis Dres. Beldermann und Kuhn<br>Werderstr. 66, Stuttgart, 70190 Germany.     | Ethik-Kommission der Med. Fakultaeet der LMU Muenchen, Prof. Dr. med. Gustav Paumgartner, Klinikum der Universitaet Grosshadern Marchioninistreet 15, Muenchen, 81377 Germany.<br><br>Chairperson- Prof. Dr. Wolfgang Eisenmenger |
| Bischoff, Joachim. Dr.med | 083042/030356                      | Dr. med Joachim Bischoff,<br>Universitaetsfrauenklinik Magdeburg, Gerhart-hauptmann-Strasse 35, Magdeburg, 39108 Germany. | Ethik-Kommission der Med. Fakultaeet der LMU Muenchen, Prof. Dr. med. Gustav Paumgartner, Klinikum der Universitaet Grosshadern Marchioninistreet 15,                                                                             |



**CONFIDENTIAL**

| Investigator            | Investigator no./Center no. | Description of Research Facility, Hospital/ Institution, and Address                                                                        | Name of IEC/IRB Committee, Address, Committee Chair                                                                                                                                                                                                       |
|-------------------------|-----------------------------|---------------------------------------------------------------------------------------------------------------------------------------------|-----------------------------------------------------------------------------------------------------------------------------------------------------------------------------------------------------------------------------------------------------------|
|                         |                             |                                                                                                                                             | <p>Muenchen, 81377 Germany.</p> <p>Chairperson- Prof. Dr. Wolfgang Eisenmenger</p>                                                                                                                                                                        |
| Bittl, Andreas. Dr.med  | 091044/030357               | <p>Dr. med. Andreas Bittl Gemeinschaftspaxis<br/>Dres. Bittl, Klein, Horn, Gruener und Wieland<br/>Weinbergweg 16, Roth, 91154 Germany.</p> | <p>Ethik-Kommission der Med. Fakultät der<br/>LMU Muenchen, Prof. Dr. med. Gustav<br/>Paumgartner, Klinikum der Universität<br/>Grosshadern Marchioninistreet 15,<br/>Muenchen, 81377 Germany.</p> <p>Chairperson- Prof. Dr. Wolfgang<br/>Eisenmenger</p> |
| Conrad, Bettina. Dr.med | 109187/070668               | <p>Dr. med. Bettina Conrad, Elisabeth<br/>Krankenhaus GmbH, Brustzentrum Kassel,<br/>Weinbergstreet 7, Kassel, 34117 Germany.</p>           | <p>Ethik-Kommission der Med. Fakultät der<br/>LMU Muenchen, Prof. Dr. med. Gustav<br/>Paumgartner, Klinikum der Universität<br/>Grosshadern Marchioninistreet 15,<br/>Muenchen, 81377 Germany.</p>                                                        |

**CONFIDENTIAL**

| Investigator                | Investigator no./Center no. | Description of Research Facility, Hospital/ Institution, and Address                                                       | Name of IEC/IRB Committee, Address, Committee Chair                                                                                                                                                                            |
|-----------------------------|-----------------------------|----------------------------------------------------------------------------------------------------------------------------|--------------------------------------------------------------------------------------------------------------------------------------------------------------------------------------------------------------------------------|
|                             |                             |                                                                                                                            | Chairperson- Prof. Dr. Wolfgang Eisenmenger                                                                                                                                                                                    |
| Cordes, Hans-Joerg. Dr.med* | 063138/030360               | Dr. med. Hans-Joerg Cordes, Vitanos GmbH, Internistisches Facharztzentrum Stresemannallee 3, Frankfurt a.M, 60596 Germany. | Ethik-Kommission der Med. Fakultät der LMU Muenchen, Prof. Dr. med. Gustav Paumgartner, Klinikum der Universität Grosshadern Marchioninistreet 15, Muenchen, 81377 Germany.<br><br>Chairperson- Prof. Dr. Wolfgang Eisenmenger |
| Deertz, Holger. Dr.med      | 111788/050710               | Dr. med. Holger Deertz, Praxis Dr. med. H. Deertz, Ruettenscheider Street 56, Essen, 45130 Germany.                        | Ethik-Kommission der Med. Fakultät der LMU Muenchen, Prof. Dr. med. Gustav Paumgartner, Klinikum der Universität Grosshadern Marchioninistreet 15, Muenchen, 81377 Germany.<br><br>Chairperson- Prof. Dr. Wolfgang Eisenmenger |

**CONFIDENTIAL**

| <b>Investigator</b>                                                            | <b>Investigator no./Center no.</b> | <b>Description of Research Facility, Hospital/ Institution, and Address</b>                                                                                   | <b>Name of IEC/IRB Committee, Address, Committee Chair</b>                                                                                                                                                                            |
|--------------------------------------------------------------------------------|------------------------------------|---------------------------------------------------------------------------------------------------------------------------------------------------------------|---------------------------------------------------------------------------------------------------------------------------------------------------------------------------------------------------------------------------------------|
| <p>Deryal, Mustafa. Dr.med<br/>Kirschbaum, Michael. Dr.med<br/>(Former PI)</p> | <p>140327/030409</p>               | <p>Dr. med. Mustafa Deryal, Caritasklinik Street. Theresia – Frauenklinik, Brustzentrum Saar Mitte, Rheinstr. 2, Saarbruecken, 66113 Germany.</p>             | <p>Ethik-Kommission der Med. Fakultät der LMU Muenchen, Prof. Dr. med. Gustav Paumgartner, Klinikum der Universität Grosshadern Marchioninistreet 15, Muenchen, 81377 Germany.</p> <p>Chairperson- Prof. Dr. Wolfgang Eisenmenger</p> |
| <p>Diedrich, Klaus. Dr.med</p>                                                 | <p>095230/031778</p>               | <p>Universitätsklinikum Schleswig-Holstein, Campus Luebeck Klinikum fuer Frauenheilkunde und Geburtshilfe, Ratzeburger Allee 160, Luebeck, 23558 Germany.</p> | <p>Ethik-Kommission der Med. Fakultät der LMU Muenchen, Prof. Dr. med. Gustav Paumgartner, Klinikum der Universität Grosshadern Marchioninistreet 15, Muenchen, 81377 Germany.</p> <p>Chairperson- Prof. Dr. Wolfgang Eisenmenger</p> |

**CONFIDENTIAL**

| <b>Investigator</b>       | <b>Investigator no./Center no.</b> | <b>Description of Research Facility, Hospital/ Institution, and Address</b>                                                                                         | <b>Name of IEC/IRB Committee, Address, Committee Chair</b>                                                                                                                                                                                    |
|---------------------------|------------------------------------|---------------------------------------------------------------------------------------------------------------------------------------------------------------------|-----------------------------------------------------------------------------------------------------------------------------------------------------------------------------------------------------------------------------------------------|
| Dietrich, Maria. Dr.med   | 091136/030361                      | Frau. Dr. med. Maria Dietrich<br>Klinikum Fichtelgebirge Marktredwitz,<br>Brustzentrum Weiden-Marktredwitz, Am<br>Schillerhain 1-8, Marktredwitz, 95615<br>Germany. | Ethik-Kommission der Med. Fakultät der<br>LMU Muenchen, Prof. Dr. med. Gustav<br>Paumgartner, Klinikum der Universität<br>Grosshadern Marchioninistreet 15,<br>Muenchen, 81377 Germany.<br><br>Chairperson- Prof. Dr. Wolfgang<br>Eisenmenger |
| Dietz, Wolfgang. Dr.med   | 091140/030362                      | Dr. med. Wolfgang Dietz, Praxis Dr. med.<br>Wolfgang Dietz, Albert-Schweitzer-Str. 18,<br>Salzgitter, 38226 Germany.                                                | Ethik-Kommission der Med. Fakultät der<br>LMU Muenchen, Prof. Dr. med. Gustav<br>Paumgartner, Klinikum der Universität<br>Grosshadern Marchioninistreet 15,<br>Muenchen, 81377 Germany.<br><br>Chairperson- Prof. Dr. Wolfgang<br>Eisenmenger |
| Doering, Gabriele. Dr.med | 111792/050371                      | Dr. med. Gabriele Doering<br>Haematologisch-Onkologische Praxis,                                                                                                    | Ethik-Kommission der Med. Fakultät der<br>LMU Muenchen, Prof. Dr. med. Gustav                                                                                                                                                                 |

**CONFIDENTIAL**

| <b>Investigator</b>         | <b>Investigator no./Center no.</b> | <b>Description of Research Facility, Hospital/ Institution, and Address</b>                                                                            | <b>Name of IEC/IRB Committee, Address, Committee Chair</b>                                                                                                                                                                        |
|-----------------------------|------------------------------------|--------------------------------------------------------------------------------------------------------------------------------------------------------|-----------------------------------------------------------------------------------------------------------------------------------------------------------------------------------------------------------------------------------|
|                             |                                    | Schwachhauser Heerstr. 54, 2 Bremen, 8209 Germany.                                                                                                     | Paumgartner, Klinikum der Universitaet Grosshadern Marchioninistreet 15, Muenchen, 81377 Germany.<br><br>Chairperson- Prof. Dr. Wolfgang Eisenmenger                                                                              |
| Eiermann, Wolfgang. Dr.med  | 005905/031780                      | Prof. Dr. med. Wolfgang Eiermann, Frauenklinik vom Roten Kreuz, I. gynaekologisch-geburtshilfliche Abteilung, Taxisstrasse 3, Muenchen, 80637 Germany. | Ethik-Kommission der Med. Fakultaeet der LMU Muenchen, Prof. Dr. med. Gustav Paumgartner, Klinikum der Universitaet Grosshadern Marchioninistreet 15, Muenchen, 81377 Germany.<br><br>Chairperson- Prof. Dr. Wolfgang Eisenmenger |
| Eschenburg, Henning. Dr.med | 091144/031786                      | Dr. med. Henning Eschenburg Praxis Dr. med. Henning Eschenburg, Am Wall 1, Guestrow, 18273 Germany.                                                    | Ethik-Kommission der Med. Fakultaeet der LMU Muenchen, Prof. Dr. med. Gustav Paumgartner, Klinikum der Universitaet Grosshadern Marchioninistreet 15,                                                                             |

**CONFIDENTIAL**

| <b>Investigator</b>                                                                                             | <b>Investigator no./Center no.</b> | <b>Description of Research Facility, Hospital/ Institution, and Address</b>                                                                                       | <b>Name of IEC/IRB Committee, Address, Committee Chair</b>                                                                                                                                                                               |
|-----------------------------------------------------------------------------------------------------------------|------------------------------------|-------------------------------------------------------------------------------------------------------------------------------------------------------------------|------------------------------------------------------------------------------------------------------------------------------------------------------------------------------------------------------------------------------------------|
|                                                                                                                 |                                    |                                                                                                                                                                   | <p>Muenchen, 81377 Germany.</p> <p>Chairperson- Prof. Dr. Wolfgang Eisenmenger</p>                                                                                                                                                       |
| Fasching, Peter A. Dr.med                                                                                       | 054327/030395                      | Dr. med. Peter A. Fasching, Frauenklinik Universitaetsklinikum Erlangen, Universitaets-Brustzentrum Franken Universitaetsstrasse 21 -23, Erlangen, 91054 Germany. | <p>Ethik-Kommission der Med. Fakultaeet der LMU Muenchen, Prof. Dr. med. Gustav Paumgartner, Klinikum der Universitaet Grosshadern Marchioninistreet 15, Muenchen, 81377 Germany.</p> <p>Chairperson- Prof. Dr. Wolfgang Eisenmenger</p> |
| <p>Fehm, Tanja. Dr.med</p> <p>Marme, Alexander. Dr, med (Former PI)</p> <p>Huober, Jens. Dr.med (Former PI)</p> | 121197/031970                      | Prof. Dr. med. Tanja Fehm, Universitaetsfrauenklinik Tuebingen, Universitaets-Brustzentrum Tuebingen, Calwerstrasse 7, Tuebingen, 72076 Germany.                  | <p>Ethik-Kommission der Med. Fakultaeet der LMU Muenchen, Prof. Dr. med. Gustav Paumgartner, Klinikum der Universitaet Grosshadern Marchioninistreet 15, Muenchen, 81377 Germany.</p>                                                    |

**CONFIDENTIAL**

| Investigator                  | Investigator no./Center no. | Description of Research Facility, Hospital/ Institution, and Address                                                                                                                     | Name of IEC/IRB Committee, Address, Committee Chair                                                                                                                                                                              |
|-------------------------------|-----------------------------|------------------------------------------------------------------------------------------------------------------------------------------------------------------------------------------|----------------------------------------------------------------------------------------------------------------------------------------------------------------------------------------------------------------------------------|
|                               |                             |                                                                                                                                                                                          | Chairperson- Prof. Dr. Wolfgang Eisenmenger                                                                                                                                                                                      |
| Felderbaum, Ricardo E. Dr.med | 091152/031788               | Prof. Dr. med. Ricardo E. Felberbaum, Klinikum Kempten-Oberallgaeu GmbH, Interdisziplinaeres Brustzentrum Kempten - Allgaeu (IBZK-A), Robert-Weixler-Strasse 50, 87439 Kempten, Germany. | Ethik-Kommission der Med. Fakultaet der LMU Muenchen, Prof. Dr. med. Gustav Paumgartner, Klinikum der Universitaet Grosshadern Marchioninistreet 15, Muenchen, 81377 Germany.<br><br>Chairperson- Prof. Dr. Wolfgang Eisenmenger |
| Fietz, Thomas                 | 119128/ 040226              | Dr. Thomas Fietz, Gem. Praxis Drs. Banhardt und Fietz, Virchowstreet 10c, Singen, 78224 Germany.                                                                                         | Ethik-Kommission der Med. Fakultaet der LMU Muenchen, Prof. Dr. med. Gustav Paumgartner, Klinikum der Universitaet Grosshadern Marchioninistreet 15, Muenchen, 81377 Germany.<br><br>Chairperson- Prof. Dr. Wolfgang Eisenmenger |

**CONFIDENTIAL**

| <b>Investigator</b>            | <b>Investigator no./Center no.</b> | <b>Description of Research Facility, Hospital/ Institution, and Address</b>                                                                    | <b>Name of IEC/IRB Committee, Address, Committee Chair</b>                                                                                                                                                                        |
|--------------------------------|------------------------------------|------------------------------------------------------------------------------------------------------------------------------------------------|-----------------------------------------------------------------------------------------------------------------------------------------------------------------------------------------------------------------------------------|
| Forstbauer, Helmut. Dr.med     | 063225/030396                      | Dr. med. Helmut Forstbauer, GOSPL (Gesellschaft fuer Onkologische Studien und Privatliquidation GbR) Schlossteet 18, Troisdorf, 53840 Germany. | Ethik-Kommission der Med. Fakultaeet der LMU Muenchen, Prof. Dr. med. Gustav Paumgartner, Klinikum der Universitaet Grosshadern Marchioninistreet 15, Muenchen, 81377 Germany.<br><br>Chairperson- Prof. Dr. Wolfgang Eisenmenger |
| Fricke, Hans Christian. Dr.med | 116556/038554                      | Klinikum Konstanz Luisenstr. 7, Konstanz, 78464 Germany.                                                                                       | Ethik-Kommission der Med. Fakultaeet der LMU Muenchen, Prof. Dr. med. Gustav Paumgartner, Klinikum der Universitaet Grosshadern Marchioninistreet 15, Muenchen, 81377 Germany.<br><br>Chairperson- Prof. Dr. Wolfgang Eisenmenger |
| Fuxius, Stefan. Dr.med         | 062885/030397                      | Dr. med. Stefan Fuxius Gemeinschaftspraxis Dres. Fuxius und Karcher, Kurfuerstenanlage                                                         | Ethik-Kommission der Med. Fakultaeet der LMU Muenchen, Prof. Dr. med. Gustav                                                                                                                                                      |



**CONFIDENTIAL**

| <b>Investigator</b>                                                                  | <b>Investigator no./Center no.</b> | <b>Description of Research Facility, Hospital/ Institution, and Address</b>                               | <b>Name of IEC/IRB Committee, Address, Committee Chair</b>                                                                                                                                                                                                   |
|--------------------------------------------------------------------------------------|------------------------------------|-----------------------------------------------------------------------------------------------------------|--------------------------------------------------------------------------------------------------------------------------------------------------------------------------------------------------------------------------------------------------------------|
|                                                                                      |                                    | 34, Heidelberg, 69115 Germany.                                                                            | <p>Paumgartner, Klinikum der Universitaet<br/>Grosshadern Marchioninistreet 15,<br/>Muenchen, 81377 Germany.</p> <p>Chairperson- Prof. Dr. Wolfgang<br/>Eisenmenger</p>                                                                                      |
| <p>Geberth, Matthias. Dr.med<br/>Chatsiproios, Dimitrios. Dr.med<br/>(Former PI)</p> | 125202/050370                      | CGG Klinik GmbH Quadrat P7, 16-17<br>Mannheim, 68161 Germany.                                             | <p>Ethik-Kommission der Med. Fakultaeet der<br/>LMU Muenchen, Prof. Dr. med. Gustav<br/>Paumgartner, Klinikum der Universitaet<br/>Grosshadern Marchioninistreet 15,<br/>Muenchen, 81377 Germany.</p> <p>Chairperson- Prof. Dr. Wolfgang<br/>Eisenmenger</p> |
| Goerke, Kay. Dr.med*                                                                 | 064985/030398                      | Dr. med. Kay Goerke, Krankenhaus<br>Schwetzingen, Bodelschwinghstreet 10,<br>Schwetzingen, 68723 Germany. | <p>Ethik-Kommission der Med. Fakultaeet der<br/>LMU Muenchen, Prof. Dr. med. Gustav<br/>Paumgartner, Klinikum der Universitaet<br/>Grosshadern Marchioninistreet 15,</p>                                                                                     |

**CONFIDENTIAL**

| <b>Investigator</b>      | <b>Investigator no./Center no.</b> | <b>Description of Research Facility, Hospital/ Institution, and Address</b>              | <b>Name of IEC/IRB Committee, Address, Committee Chair</b>                                                                                                                                                                            |
|--------------------------|------------------------------------|------------------------------------------------------------------------------------------|---------------------------------------------------------------------------------------------------------------------------------------------------------------------------------------------------------------------------------------|
|                          |                                    |                                                                                          | <p>Muenchen, 81377 Germany.</p> <p>Chairperson- Prof. Dr. Wolfgang Eisenmenger</p>                                                                                                                                                    |
| Graffunder, Gerd. Dr.med | 091156/030399                      | Gerd Graffunder, Frauenarzt -Zentrum-Zehlendorf, Teltower Damm 7, Berlin, 14169 Germany. | <p>Ethik-Kommission der Med. Fakultät der LMU Muenchen, Prof. Dr. med. Gustav Paumgartner, Klinikum der Universität Grosshadern Marchioninistreet 15, Muenchen, 81377 Germany.</p> <p>Chairperson- Prof. Dr. Wolfgang Eisenmenger</p> |
| Grunewald, Ralf. Dr.med  | 091158/030400                      | Onkologische Gemeinschaftspraxis, Im Pruefling 17-19, Frankfurt a. M., 60389 Germany.    | <p>Ethik-Kommission der Med. Fakultät der LMU Muenchen, Prof. Dr. med. Gustav Paumgartner, Klinikum der Universität Grosshadern Marchioninistreet 15, Muenchen, 81377 Germany.</p>                                                    |

**CONFIDENTIAL**

| Investigator           | Investigator no./Center no. | Description of Research Facility, Hospital/ Institution, and Address                                   | Name of IEC/IRB Committee, Address, Committee Chair                                                                                                                                                                            |
|------------------------|-----------------------------|--------------------------------------------------------------------------------------------------------|--------------------------------------------------------------------------------------------------------------------------------------------------------------------------------------------------------------------------------|
|                        |                             |                                                                                                        | Chairperson- Prof. Dr. Wolfgang Eisenmenger                                                                                                                                                                                    |
| Guth, Dagmar. Dr.med   | 117498/039528               | Dr. med. Dagmar Guth, Plauener Street 33 A, Plauen-Kauschwitz, 08525 Germany.                          | Ethik-Kommission der Med. Fakultät der LMU Muenchen, Prof. Dr. med. Gustav Paumgartner, Klinikum der Universität Grosshadern Marchioninistreet 15, Muenchen, 81377 Germany.<br><br>Chairperson- Prof. Dr. Wolfgang Eisenmenger |
| Hackmann, John. Dr.med | 091159/030401               | Herr Dr. med. John Hackmann, Marienhospital Witten, Brustzentrum Marienplatz 2, Witten, 58452 Germany. | Ethik-Kommission der Med. Fakultät der LMU Muenchen, Prof. Dr. med. Gustav Paumgartner, Klinikum der Universität Grosshadern Marchioninistreet 15, Muenchen, 81377 Germany.<br><br>Chairperson- Prof. Dr. Wolfgang Eisenmenger |

**CONFIDENTIAL**

| <b>Investigator</b>   | <b>Investigator no./Center no.</b> | <b>Description of Research Facility, Hospital/ Institution, and Address</b>                                          | <b>Name of IEC/IRB Committee, Address, Committee Chair</b>                                                                                                                                                                     |
|-----------------------|------------------------------------|----------------------------------------------------------------------------------------------------------------------|--------------------------------------------------------------------------------------------------------------------------------------------------------------------------------------------------------------------------------|
| Hahn, Lars. Dr.med    | 072969/030402                      | Dr. med. Lars Hahn, Gemeinschaftspraxis Dres. Schumann, Reinhardt und Hahn, Wiescherstreet 20, Herne, 44623 Germany. | Ethik-Kommission der Med. Fakultät der LMU Muenchen, Prof. Dr. med. Gustav Paumgartner, Klinikum der Universität Grosshadern Marchioninistreet 15, Muenchen, 81377 Germany.<br><br>Chairperson- Prof. Dr. Wolfgang Eisenmenger |
| Hanf, Volker. Dr.med  | 091160/030403                      | Prof. Dr. med. Volker Hanf, Städtisches Klinikum Fuerth, Brustzentrum, Jakob-Henle-Street 1, Fuerth, 90766 Germany.  | Ethik-Kommission der Med. Fakultät der LMU Muenchen, Prof. Dr. med. Gustav Paumgartner, Klinikum der Universität Grosshadern Marchioninistreet 15, Muenchen, 81377 Germany.<br><br>Chairperson- Prof. Dr. Wolfgang Eisenmenger |
| Heinig, Karin. Dr.med | 117953/039745                      | Dr. med. Karin Heinig, Arztpraxis fuer Frauenheilkunde, Seilergasse 1, Sprengberg,                                   | Ethik-Kommission der Med. Fakultät der LMU Muenchen, Prof. Dr. med. Gustav                                                                                                                                                     |

**CONFIDENTIAL**

| <b>Investigator</b>     | <b>Investigator no./Center no.</b> | <b>Description of Research Facility, Hospital/ Institution, and Address</b>                                         | <b>Name of IEC/IRB Committee, Address, Committee Chair</b>                                                                                                                                                                                                   |
|-------------------------|------------------------------------|---------------------------------------------------------------------------------------------------------------------|--------------------------------------------------------------------------------------------------------------------------------------------------------------------------------------------------------------------------------------------------------------|
|                         |                                    | 03130 Germany.                                                                                                      | <p>Paumgartner, Klinikum der Universitaet<br/>Grosshadern Marchioninistreet 15,<br/>Muenchen, 81377 Germany.</p> <p>Chairperson- Prof. Dr. Wolfgang<br/>Eisenmenger</p>                                                                                      |
| Heinrich, Georg. Dr.med | 038214/030405                      | Dr. med. Georg Heinrich, Schwerpunktpraxis fuer Gynaekologische Onkologie Domgasse 1, Fuerstenwalde, 15517 Germany. | <p>Ethik-Kommission der Med. Fakultaeet der<br/>LMU Muenchen, Prof. Dr. med. Gustav<br/>Paumgartner, Klinikum der Universitaet<br/>Grosshadern Marchioninistreet 15,<br/>Muenchen, 81377 Germany.</p> <p>Chairperson- Prof. Dr. Wolfgang<br/>Eisenmenger</p> |
| Hempel, Dirk. Dr.med*   | 064427/030406                      | Dr. med. Dirk Hempel, Praxis Dr. Hernalp, Bergstr. 9a, Rehling, 86508 Germany.                                      | <p>Ethik-Kommission der Med. Fakultaeet der<br/>LMU Muenchen, Prof. Dr. med. Gustav<br/>Paumgartner, Klinikum der Universitaet<br/>Grosshadern Marchioninistreet 15,</p>                                                                                     |

**CONFIDENTIAL**

| Investigator                                                              | Investigator no./Center no. | Description of Research Facility, Hospital/ Institution, and Address                                                                                    | Name of IEC/IRB Committee, Address, Committee Chair                                                                                                                                                                                      |
|---------------------------------------------------------------------------|-----------------------------|---------------------------------------------------------------------------------------------------------------------------------------------------------|------------------------------------------------------------------------------------------------------------------------------------------------------------------------------------------------------------------------------------------|
|                                                                           |                             |                                                                                                                                                         | <p>Muenchen, 81377 Germany.</p> <p>Chairperson- Prof. Dr. Wolfgang Eisenmenger</p>                                                                                                                                                       |
| <p>Herwig, Uwe. Dr.med<br/>Carstensen, Martin. Dr.med<br/>(Former PI)</p> | <p>093597/030359</p>        | <p>Dr. med. Uwe Herwig, Albertinen Krankenhaus, Hamburg 8uentelstrasse 11 a, Hamburg, 22457 Germany.</p>                                                | <p>Ethik-Kommission der Med. Fakultaeet der LMU Muenchen, Prof. Dr. med. Gustav Paumgartner, Klinikum der Universitaet Grosshadern Marchioninistreet 15, Muenchen, 81377 Germany.</p> <p>Chairperson- Prof. Dr. Wolfgang Eisenmenger</p> |
| <p>Hoess, Cornelia.PD. Dr.med</p>                                         | <p>091014/033515</p>        | <p>PD Dr. med. Comelia Hoess, Kreisklinik Ebersberg GmbH, Brustzentrum Rosenheim – Ebersberg, Pfarrer-Guggetzer Street 3, Ebersberg, 85560 Germany.</p> | <p>Ethik-Kommission der Med. Fakultaeet der LMU Muenchen, Prof. Dr. med. Gustav Paumgartner, Klinikum der Universitaet Grosshadern Marchioninistreet 15, Muenchen, 81377 Germany.</p>                                                    |

**CONFIDENTIAL**

| <b>Investigator</b>                                                                                           | <b>Investigator no./Center no.</b> | <b>Description of Research Facility, Hospital/ Institution, and Address</b>                                             | <b>Name of IEC/IRB Committee, Address, Committee Chair</b>                                                                                                                                                                     |
|---------------------------------------------------------------------------------------------------------------|------------------------------------|-------------------------------------------------------------------------------------------------------------------------|--------------------------------------------------------------------------------------------------------------------------------------------------------------------------------------------------------------------------------|
|                                                                                                               |                                    |                                                                                                                         | Chairperson- Prof. Dr. Wolfgang Eisenmenger                                                                                                                                                                                    |
| Huebner, Jutta. Dr.med                                                                                        | 119133/040227                      | Dr. med. Jutta Huebner, Gemeinschaftspraxis am Rhoenplatz, Standort Onkologie, Wigandstreet 1, Kassel, 34131 Germany.   | Ethik-Kommission der Med. Fakultät der LMU Muenchen, Prof. Dr. med. Gustav Paumgartner, Klinikum der Universität Grosshadern Marchioninistreet 15, Muenchen, 81377 Germany.<br><br>Chairperson- Prof. Dr. Wolfgang Eisenmenger |
| Jueckstock, Julia. Dr.med<br>Sommer, Harald. Dr. med<br>(Former PI)<br>Janni, Wolfgang. Dr.med<br>(Former PI) | 096658/030348                      | Prof. Dr.med. Harald Sommer, Klinikum der Universität Muenchen, Frauenheilkunde, Maistreet 11, Muenchen, 80337 Germany. | Ethik-Kommission der Med. Fakultät der LMU Muenchen, Prof. Dr. med. Gustav Paumgartner, Klinikum der Universität Grosshadern Marchioninistreet 15, Muenchen, 81377 Germany.<br><br>Chairperson- Prof. Dr. Wolfgang Eisenmenger |

**CONFIDENTIAL**

| <b>Investigator</b>                                     | <b>Investigator no./Center no.</b> | <b>Description of Research Facility, Hospital/ Institution, and Address</b>                                                                     | <b>Name of IEC/IRB Committee, Address, Committee Chair</b>                                                                                                                                                                                    |
|---------------------------------------------------------|------------------------------------|-------------------------------------------------------------------------------------------------------------------------------------------------|-----------------------------------------------------------------------------------------------------------------------------------------------------------------------------------------------------------------------------------------------|
| Kast, Karin<br>Distler, Wolfgang. Dr.med<br>(Former PI) | 095796/030363                      | Dr. med. Karin Kast, Universitätsklinikum Carl Gustav Carus, Regionales Brustzentrum<br>Dresden, Fetscherstrasse 74, Dresden, 01307<br>Germany. | Ethik-Kommission der Med. Fakultät der<br>LMU Muenchen, Prof. Dr. med. Gustav<br>Paumgartner, Klinikum der Universität<br>Grosshadern Marchioninistreet 15,<br>Muenchen, 81377 Germany.<br><br>Chairperson- Prof. Dr. Wolfgang<br>Eisenmenger |
| Klare, Peter. Dr.med                                    | 040459/036075                      | Dr. med. Peter Klare, Praxisklinik<br>Krebsheilkunde fuer Frauen,<br>Moellendorffstreet 52, Berlin, 10367 Germany.                              | Ethik-Kommission der Med. Fakultät der<br>LMU Muenchen, Prof. Dr. med. Gustav<br>Paumgartner, Klinikum der Universität<br>Grosshadern Marchioninistreet 15,<br>Muenchen, 81377 Germany.<br><br>Chairperson- Prof. Dr. Wolfgang<br>Eisenmenger |
| Ko, Yon-Dschun Dr.med                                   | 032777/031972                      | Prof. Dr. med. Yon-Dschun Ko, Johanniter<br>Krankenhaus, Innere Medizin I,                                                                      | Ethik-Kommission der Med. Fakultät der<br>LMU Muenchen, Prof. Dr. med. Gustav                                                                                                                                                                 |



**CONFIDENTIAL**

| <b>Investigator</b>                                                      | <b>Investigator no./Center no.</b> | <b>Description of Research Facility, Hospital/ Institution, and Address</b>                                      | <b>Name of IEC/IRB Committee, Address, Committee Chair</b>                                                                                                                                                                                                  |
|--------------------------------------------------------------------------|------------------------------------|------------------------------------------------------------------------------------------------------------------|-------------------------------------------------------------------------------------------------------------------------------------------------------------------------------------------------------------------------------------------------------------|
|                                                                          |                                    | Johanniterstreet 3 – 5, Bonn, 53113 Germany.                                                                     | <p>Paumgartner, Klinikum der Universitaet<br/>Grosshadern Marchioninistreet 15,<br/>Muenchen, 81377 Germany.</p> <p>Chairperson- Prof. Dr. Wolfgang<br/>Eisenmenger</p>                                                                                     |
| <p>Krabisch, Petra. Dr.med<br/>Steck, Thomas. Dr.med<br/>(Former PI)</p> | 055393/031811                      | Dr. med. Petra Krabisch, Klinikum Chemnitz<br>gGmbH, Brustzentrum, Flemmingstrabe 4,<br>Chemnitz, 09116 Germany. | <p>Ethik-Kommission der Med. Fakultaet der<br/>LMU Muenchen, Prof. Dr. med. Gustav<br/>Paumgartner, Klinikum der Universitaet<br/>Grosshadern Marchioninistreet 15,<br/>Muenchen, 81377 Germany.</p> <p>Chairperson- Prof. Dr. Wolfgang<br/>Eisenmenger</p> |
| Krafft, Winfried. Dr.med                                                 | 112539/037387                      | Prof. Dr. med. Winfried Krafft, Kleine<br>Loebergasse 1, Eisenach, 99817 Germany.                                | <p>Ethik-Kommission der Med. Fakultaet der<br/>LMU Muenchen, Prof. Dr. med. Gustav<br/>Paumgartner, Klinikum der Universitaet<br/>Grosshadern Marchioninistreet 15,</p>                                                                                     |

**CONFIDENTIAL**

| <b>Investigator</b>                      | <b>Investigator no./Center no.</b> | <b>Description of Research Facility, Hospital/ Institution, and Address</b>                                                         | <b>Name of IEC/IRB Committee, Address, Committee Chair</b>                                                                                                                                                                               |
|------------------------------------------|------------------------------------|-------------------------------------------------------------------------------------------------------------------------------------|------------------------------------------------------------------------------------------------------------------------------------------------------------------------------------------------------------------------------------------|
|                                          |                                    |                                                                                                                                     | <p>Muenchen, 81377 Germany.</p> <p>Chairperson- Prof. Dr. Wolfgang Eisenmenger</p>                                                                                                                                                       |
| Kreienberg, Rolf                         | 037503/031796                      | Universitaetsklinikum Ulm, Prittwitzstreet 43, Ulm, Baden-Wuerttemberg, 89075 Germany.                                              | <p>Ethik-Kommission der Med. Fakultaeet der LMU Muenchen, Prof. Dr. med. Gustav Paumgartner, Klinikum der Universitaet Grosshadern Marchioninistreet 15, Muenchen, 81377 Germany.</p> <p>Chairperson- Prof. Dr. Wolfgang Eisenmenger</p> |
| Kreisel-Buestgens, Christiane.<br>Dr.med | 091026/030410                      | Dr. med. Christiane Kreisel-Buestgens, Praxis Dr. med. Christiane Kreisel- Buestgens, Flurweg 13, Porta Westfellica, 32457 Germany. | <p>Ethik-Kommission der Med. Fakultaeet der LMU Muenchen, Prof. Dr. med. Gustav Paumgartner, Klinikum der Universitaet Grosshadern Marchioninistreet 15, Muenchen, 81377 Germany.</p>                                                    |

**CONFIDENTIAL**

| Investigator               | Investigator no./Center no. | Description of Research Facility, Hospital/ Institution, and Address                                                              | Name of IEC/IRB Committee, Address, Committee Chair                                                                                                                                                                            |
|----------------------------|-----------------------------|-----------------------------------------------------------------------------------------------------------------------------------|--------------------------------------------------------------------------------------------------------------------------------------------------------------------------------------------------------------------------------|
|                            |                             |                                                                                                                                   | Chairperson- Prof. Dr. Wolfgang Eisenmenger                                                                                                                                                                                    |
| Kroening, Hendrik. Dr.med  | 091029/031797               | Dr. med. Hendrik Kroening, Hasselbachplatz 2, Magdeburg, 39104 Germany.                                                           | Ethik-Kommission der Med. Fakultät der LMU Muenchen, Prof. Dr. med. Gustav Paumgartner, Klinikum der Universität Grosshadern Marchioninistreet 15, Muenchen, 81377 Germany.<br><br>Chairperson- Prof. Dr. Wolfgang Eisenmenger |
| Landthaler, Robert. Dr.med | 116540/039150               | Dr. med. Robert Landthaler, Gemeinschaftspraxis, Dres. Landthaler und Litschmann, Mindelheimerstreet 69, 86381 Krumbach, Germany. | Ethik-Kommission der Med. Fakultät der LMU Muenchen, Prof. Dr. med. Gustav Paumgartner, Klinikum der Universität Grosshadern Marchioninistreet 15, Muenchen, 81377 Germany.<br><br>Chairperson- Prof. Dr. Wolfgang Eisenmenger |

**CONFIDENTIAL**

| <b>Investigator</b>                                           | <b>Investigator no./Center no.</b> | <b>Description of Research Facility, Hospital/ Institution, and Address</b>                                | <b>Name of IEC/IRB Committee, Address, Committee Chair</b>                                                                                                                                                                        |
|---------------------------------------------------------------|------------------------------------|------------------------------------------------------------------------------------------------------------|-----------------------------------------------------------------------------------------------------------------------------------------------------------------------------------------------------------------------------------|
| Latta, Sabine. Dr.med<br>Warm, Mathias. Dr.med<br>(Former PI) | 222522/037376                      | Dr. med. Sabine Latta, Klinikum der Universitaet zu Koeln, Kerpener Street 62, Koeln, 50924 Germany.       | Ethik-Kommission der Med. Fakultaeet der LMU Muenchen, Prof. Dr. med. Gustav Paumgartner, Klinikum der Universitaet Grosshadern Marchioninistreet 15, Muenchen, 81377 Germany.<br><br>Chairperson- Prof. Dr. Wolfgang Eisenmenger |
| Leitsmann, Horst. Dr.sc.med                                   | 091035/030411                      | Prof.Dr.sc.med. Horst Leitsmann, Praxis Dres. Leitsmann und Lenk, Goethestreet 21, Zwickau, 08060 Germany. | Ethik-Kommission der Med. Fakultaeet der LMU Muenchen, Prof. Dr. med. Gustav Paumgartner, Klinikum der Universitaet Grosshadern Marchioninistreet 15, Muenchen, 81377 Germany.<br><br>Chairperson- Prof. Dr. Wolfgang Eisenmenger |
| Luhn, Birgit. Dr.med<br>Lipp, Rainer. Dr.med (Former          | 063764/030412                      | OncoResearch Lerchenfeld UG, Lerchenfeld 14, Hamburg, 22081 Germany.                                       | Ethik-Kommission der Med. Fakultaeet der LMU Muenchen, Prof. Dr. med. Gustav                                                                                                                                                      |

**CONFIDENTIAL**

| <b>Investigator</b>       | <b>Investigator no./Center no.</b> | <b>Description of Research Facility, Hospital/ Institution, and Address</b>                                                          | <b>Name of IEC/IRB Committee, Address, Committee Chair</b>                                                                                                                                                                                                   |
|---------------------------|------------------------------------|--------------------------------------------------------------------------------------------------------------------------------------|--------------------------------------------------------------------------------------------------------------------------------------------------------------------------------------------------------------------------------------------------------------|
| PI)                       |                                    |                                                                                                                                      | <p>Paumgartner, Klinikum der Universitaet<br/>Grosshadern Marchioninistreet 15,<br/>Muenchen, 81377 Germany.</p> <p>Chairperson- Prof. Dr. Wolfgang<br/>Eisenmenger</p>                                                                                      |
| Maasberg, Michael. Dr.med | 095232/030414                      | Dr. med. Michael Maasberg, Praxis Dr. med. Michael Maasberg, Siegfriedstr. 20, Mayen, 56727 Germany.                                 | <p>Ethik-Kommission der Med. Fakultaeet der<br/>LMU Muenchen, Prof. Dr. med. Gustav<br/>Paumgartner, Klinikum der Universitaet<br/>Grosshadern Marchioninistreet 15,<br/>Muenchen, 81377 Germany.</p> <p>Chairperson- Prof. Dr. Wolfgang<br/>Eisenmenger</p> |
| Madjar, Helmut. Dr.med    | 095235/030415                      | Prof. Dr. med. Helmut Madjar, Stiftung Deutsche Klinik fuer Diagnostik GmbH, Gynaekologie, Aukammallee 33, Wiesbaden, 65191 Germany. | <p>Ethik-Kommission der Med. Fakultaeet der<br/>LMU Muenchen, Prof. Dr. med. Gustav<br/>Paumgartner, Klinikum der Universitaet<br/>Grosshadern Marchioninistreet 15,</p>                                                                                     |

**CONFIDENTIAL**

| <b>Investigator</b>                                                                                            | <b>Investigator no./Center no.</b> | <b>Description of Research Facility, Hospital/ Institution, and Address</b>                                         | <b>Name of IEC/IRB Committee, Address, Committee Chair</b>                                                                                                                                                                            |
|----------------------------------------------------------------------------------------------------------------|------------------------------------|---------------------------------------------------------------------------------------------------------------------|---------------------------------------------------------------------------------------------------------------------------------------------------------------------------------------------------------------------------------------|
|                                                                                                                |                                    |                                                                                                                     | <p>Muenchen, 81377 Germany.</p> <p>Chairperson- Prof. Dr. Wolfgang Eisenmenger</p>                                                                                                                                                    |
| Marschner, Norbert. Dr.med                                                                                     | 091041/037348                      | Dr. med. Norbert Marschner, Onkologische, Gemeinschaftspraxis, Breisacher Street 117, Freiburg, 79106 Germany.      | <p>Ethik-Kommission der Med. Fakultät der LMU Muenchen, Prof. Dr. med. Gustav Paumgartner, Klinikum der Universität Grosshadern Marchioninistreet 15, Muenchen, 81377 Germany.</p> <p>Chairperson- Prof. Dr. Wolfgang Eisenmenger</p> |
| <p>Mau, Christine. Dr.med</p> <p>Wunschel, Aysen. Dr.med (Former PI)</p> <p>Keil, Elke. Dr.med (Former PI)</p> | 126433/030408                      | Dr. med. Christine Mau, Helios Klinikum Berlin Buch, Brustzentrum, Schwan becker Chausee 50, Berlin, 13125 Germany. | <p>Ethik-Kommission der Med. Fakultät der LMU Muenchen, Prof. Dr. med. Gustav Paumgartner, Klinikum der Universität Grosshadern Marchioninistreet 15, Muenchen, 81377 Germany.</p>                                                    |

**CONFIDENTIAL**

| <b>Investigator</b>      | <b>Investigator no./Center no.</b> | <b>Description of Research Facility, Hospital/ Institution, and Address</b>                                                   | <b>Name of IEC/IRB Committee, Address, Committee Chair</b>                                                                                                                                                                        |
|--------------------------|------------------------------------|-------------------------------------------------------------------------------------------------------------------------------|-----------------------------------------------------------------------------------------------------------------------------------------------------------------------------------------------------------------------------------|
|                          |                                    |                                                                                                                               | Chairperson- Prof. Dr. Wolfgang Eisenmenger                                                                                                                                                                                       |
| Moebus, Volker. Dr.med*  | 040470/031800                      | Prof. Dr. med. Volker Moebus, Staedtische Kliniken Frankfurt am Main – Hoechst, Gotenstr. 6-8, Frankfurt a.M., 65929 Germany. | Ethik-Kommission der Med. Fakultaeet der LMU Muenchen, Prof. Dr. med. Gustav Paumgartner, Klinikum der Universitaet Grosshadern Marchioninistreet 15, Muenchen, 81377 Germany.<br><br>Chairperson- Prof. Dr. Wolfgang Eisenmenger |
| Morack, Doerthe. Dr.med* | 091049/031801                      | Dr. med. Doerthe Momck, Praxis Dr. med. Doerthe Morack, Blankenburger Street 47, 1 Berlin, 3156 Germany.                      | Ethik-Kommission der Med. Fakultaeet der LMU Muenchen, Prof. Dr. med. Gustav Paumgartner, Klinikum der Universitaet Grosshadern Marchioninistreet 15, Muenchen, 81377 Germany.<br><br>Chairperson- Prof. Dr. Wolfgang Eisenmenger |

**CONFIDENTIAL**

| <b>Investigator</b>                                            | <b>Investigator no./Center no.</b> | <b>Description of Research Facility, Hospital/ Institution, and Address</b>                                             | <b>Name of IEC/IRB Committee, Address, Committee Chair</b>                                                                                                                                                                        |
|----------------------------------------------------------------|------------------------------------|-------------------------------------------------------------------------------------------------------------------------|-----------------------------------------------------------------------------------------------------------------------------------------------------------------------------------------------------------------------------------|
| Mueller, Volkmar. Dr.med<br>Lisboa, Bjoern. Dr.med (Former PI) | 091170/030413                      | Universitaetsklinikum Harnburg-Eppendorf, Brustzentrum, Martinistr.52, 2 Hamburg, 0246 Germany.                         | Ethik-Kommission der Med. Fakultaeet der LMU Muenchen, Prof. Dr. med. Gustav Paumgartner, Klinikum der Universitaet Grosshadern Marchioninistreet 15, Muenchen, 81377 Germany.<br><br>Chairperson- Prof. Dr. Wolfgang Eisenmenger |
| Mueller-Hagen, Sigrun. Dr.med                                  | 054139/033514                      | Dr. med. Sigrun Mueller-Hagen, Haematologisch-oncologischer Schwerpunkt, Pinneberger Street 25, Hamburg, 22457 Germany. | Ethik-Kommission der Med. Fakultaeet der LMU Muenchen, Prof. Dr. med. Gustav Paumgartner, Klinikum der Universitaet Grosshadern Marchioninistreet 15, Muenchen, 81377 Germany.<br><br>Chairperson- Prof. Dr. Wolfgang Eisenmenger |
| Nusch, Arnd. Dr.med                                            | 062508/030418                      | Dr. med. Arnd Nusch, Praxis Dr. med. Arnd Nusch, Friedrichstr, 311, Velbert, 42551                                      | Ethik-Kommission der Med. Fakultaeet der LMU Muenchen, Prof. Dr. med. Gustav                                                                                                                                                      |



**CONFIDENTIAL**

| <b>Investigator</b>         | <b>Investigator no./Center no.</b> | <b>Description of Research Facility, Hospital/ Institution, and Address</b>                       | <b>Name of IEC/IRB Committee, Address, Committee Chair</b>                                                                                                                                                                                                   |
|-----------------------------|------------------------------------|---------------------------------------------------------------------------------------------------|--------------------------------------------------------------------------------------------------------------------------------------------------------------------------------------------------------------------------------------------------------------|
|                             |                                    | Germany.                                                                                          | <p>Paumgartner, Klinikum der Universitaet<br/>Grosshadern Marchioninistreet 15,<br/>Muenchen, 81377 Germany.</p> <p>Chairperson- Prof. Dr. Wolfgang<br/>Eisenmenger</p>                                                                                      |
| Overkamp, Friedrich. Dr.med | 116542/039515                      | Dr. med. Friedrich Overkamp, Oncologianova GmbH, Springstrasse 24, Recklinghausen, 45657 Germany. | <p>Ethik-Kommission der Med. Fakultaeet der<br/>LMU Muenchen, Prof. Dr. med. Gustav<br/>Paumgartner, Klinikum der Universitaet<br/>Grosshadern Marchioninistreet 15,<br/>Muenchen, 81377 Germany.</p> <p>Chairperson- Prof. Dr. Wolfgang<br/>Eisenmenger</p> |
| Papke, Jens. Dr.med         | 090996/030419                      | Dr. med. Jens Papke, Praxis Dr. med. Jens Papke Rosa-Luxemburg-Street 6, Neustadt, 01844 Germany. | <p>Ethik-Kommission der Med. Fakultaeet der<br/>LMU Muenchen, Prof. Dr. med. Gustav<br/>Paumgartner, Klinikum der Universitaet<br/>Grosshadern Marchioninistreet 15,</p>                                                                                     |

**CONFIDENTIAL**

| <b>Investigator</b>                                                                   | <b>Investigator no./Center no.</b> | <b>Description of Research Facility, Hospital/ Institution, and Address</b>                                                                                                     | <b>Name of IEC/IRB Committee, Address, Committee Chair</b>                                                                                                                                                                                                |
|---------------------------------------------------------------------------------------|------------------------------------|---------------------------------------------------------------------------------------------------------------------------------------------------------------------------------|-----------------------------------------------------------------------------------------------------------------------------------------------------------------------------------------------------------------------------------------------------------|
|                                                                                       |                                    |                                                                                                                                                                                 | <p>Muenchen, 81377 Germany.</p> <p>Chairperson- Prof. Dr. Wolfgang Eisenmenger</p>                                                                                                                                                                        |
| <p>Park-Simon, Tjong-Won.<br/>Dr.med<br/>Kuehnle, Henning. Dr.med<br/>(Former PI)</p> | <p>154925/031971</p>               | <p>Prof. Dr. med. Tjong-Won Park-Simon,<br/>Medizinische Hochschule Hannover, Allg.<br/>Gynaekologie und Geburtshilfe, Carl-Neuberg-<br/>Street 1, Hannover, 30625 Germany.</p> | <p>Ethik-Kommission der Med. Fakultät der<br/>LMU Muenchen, Prof. Dr. med. Gustav<br/>Paumgartner, Klinikum der Universität<br/>Grosshadern Marchioninistreet 15,<br/>Muenchen, 81377 Germany.</p> <p>Chairperson- Prof. Dr. Wolfgang<br/>Eisenmenger</p> |
| <p>Peters, Martin. Dr.med<br/>Meinen, Klaus. Dr.med (Former<br/>PI)</p>               | <p>098245/031798</p>               | <p>Dr. med. Martin Peters, Saint. Josels<br/>Krankenhaus Hilden GmbH, Senologie Walder<br/>Street 34-38, Hilden, 40724 Germany.</p>                                             | <p>Ethik-Kommission der Med. Fakultät der<br/>LMU Muenchen, Prof. Dr. med. Gustav<br/>Paumgartner, Klinikum der Universität<br/>Grosshadern Marchioninistreet 15,<br/>Muenchen, 81377 Germany.</p>                                                        |

**CONFIDENTIAL**

| <b>Investigator</b>          | <b>Investigator no./Center no.</b> | <b>Description of Research Facility, Hospital/ Institution, and Address</b>                                                                                    | <b>Name of IEC/IRB Committee, Address, Committee Chair</b>                                                                                                                                                                     |
|------------------------------|------------------------------------|----------------------------------------------------------------------------------------------------------------------------------------------------------------|--------------------------------------------------------------------------------------------------------------------------------------------------------------------------------------------------------------------------------|
|                              |                                    |                                                                                                                                                                | Chairperson- Prof. Dr. Wolfgang Eisenmenger                                                                                                                                                                                    |
| Pihusch, Rudolf. PD, Dr.med* | 116546/039516                      | PD Dr. med. Rudolf Pihusch, Tagesklinik, Rosenheim - Tagesklinik Bad Trissl, Onkologische Schwerpunktpraxis, Rathausstreet 14, 83022 Rosenheim, 83022 Germany. | Ethik-Kommission der Med. Fakultät der LMU Muenchen, Prof. Dr. med. Gustav Paumgartner, Klinikum der Universität Grosshadern Marchioninistreet 15, Muenchen, 81377 Germany.<br><br>Chairperson- Prof. Dr. Wolfgang Eisenmenger |
| Reles, Angela. PD,Dr.med     | 052244/039518                      | PD Dr. med. Angela Reles, Arztpraxis fuer Frauenheilkunde und Geburtshilfe, Ruedesheimer Platz 5, Berlin, 14197 Germany.                                       | Ethik-Kommission der Med. Fakultät der LMU Muenchen, Prof. Dr. med. Gustav Paumgartner, Klinikum der Universität Grosshadern Marchioninistreet 15, Muenchen, 81377 Germany.<br><br>Chairperson- Prof. Dr. Wolfgang Eisenmenger |

**CONFIDENTIAL**

| <b>Investigator</b>        | <b>Investigator no./Center no.</b> | <b>Description of Research Facility, Hospital/ Institution, and Address</b>                                         | <b>Name of IEC/IRB Committee, Address, Committee Chair</b>                                                                                                                                                                                     |
|----------------------------|------------------------------------|---------------------------------------------------------------------------------------------------------------------|------------------------------------------------------------------------------------------------------------------------------------------------------------------------------------------------------------------------------------------------|
| Rezai, Mahdi. Dr.med*      | 090999/031803                      | Dr. med. Mahdi Rezai, Brustzentrum<br>Duesseldorf Luisenkrankenhaus, Degerstrasse<br>8, Duesseldorf, 40235 Germany. | Ethik-Kommission der Med. Fakultät der<br>LMU Muenchen, Prof. Dr. med. Gustav<br>Paumgartner, Klinikum der Universitaet<br>Grosshadern Marchioninistreet 15,<br>Muenchen, 81377 Germany.<br><br>Chairperson- Prof. Dr. Wolfgang<br>Eisenmenger |
| Ruffert, Klaus. PD, Dr.med | 091001/030420                      | PD Dr. med. Klaus Ruffert, Early Phase<br>Solutions GmbH (EPS), Goethe Galerie 3b,<br>Jena, 07743 Germany.          | Ethik-Kommission der Med. Fakultät der<br>LMU Muenchen, Prof. Dr. med. Gustav<br>Paumgartner, Klinikum der Universitaet<br>Grosshadern Marchioninistreet 15,<br>Muenchen, 81377 Germany.<br><br>Chairperson- Prof. Dr. Wolfgang<br>Eisenmenger |
| Ruhmland, Birgit. Dr.med   | 116640/039519                      | Dr. med. Birgit Ruhmland, Frauenheilkunde<br>und Geburtshilfe, Eisterwerdaer Platz 1, 12683                         | Ethik-Kommission der Med. Fakultät der<br>LMU Muenchen, Prof. Dr. med. Gustav                                                                                                                                                                  |

**CONFIDENTIAL**

| <b>Investigator</b>                                                                         | <b>Investigator no./Center no.</b> | <b>Description of Research Facility, Hospital/ Institution, and Address</b>                                                                                            | <b>Name of IEC/IRB Committee, Address, Committee Chair</b>                                                                                                                                                                                      |
|---------------------------------------------------------------------------------------------|------------------------------------|------------------------------------------------------------------------------------------------------------------------------------------------------------------------|-------------------------------------------------------------------------------------------------------------------------------------------------------------------------------------------------------------------------------------------------|
|                                                                                             |                                    | Berlin, Germany.                                                                                                                                                       | Paumgartner, Klinikum der Universitaet<br>Grosshadern Marchioninistreet 15,<br>Muenchen, 81377 Germany.<br><br>Chairperson- Prof. Dr. Wolfgang<br>Eisenmenger                                                                                   |
| Runnebaum, Ingo. Dr.med                                                                     | 091003/031804                      | Prof. Dr. med Ingo Runnebaum, Klinikum der<br>Friendrich-Schiller-Universitaet Jena,<br>Interdisziplinaeres Brustzentrum Jena,<br>Bachstrasse 18, Jena, 07743 Germany. | Ethik-Kommission der Med. Fakultaet der<br>LMU Muenchen, Prof. Dr. med. Gustav<br>Paumgartner, Klinikum der Universitaet<br>Grosshadern Marchioninistreet 15,<br>Muenchen, 81377 Germany.<br><br>Chairperson- Prof. Dr. Wolfgang<br>Eisenmenger |
| Sallmann, Alexandra<br>Jochim-Maier, Rosa. Dr.med<br>(Former PI)<br>Hauschild, Maik. Dr.med | 184790/030404                      | Frauenklinik Rheinfelden, Brustzentrum,<br>Therese-Herzog-Weg 2, Rheinfelden/BD,<br>79618 Germany.                                                                     | Ethik-Kommission der Med. Fakultaet der<br>LMU Muenchen, Prof. Dr. med. Gustav<br>Paumgartner, Klinikum der Universitaet<br>Grosshadern Marchioninistreet 15,                                                                                   |

**CONFIDENTIAL**

| <b>Investigator</b>        | <b>Investigator no./Center no.</b> | <b>Description of Research Facility, Hospital/ Institution, and Address</b>                                      | <b>Name of IEC/IRB Committee, Address, Committee Chair</b>                                                                                                                                                                               |
|----------------------------|------------------------------------|------------------------------------------------------------------------------------------------------------------|------------------------------------------------------------------------------------------------------------------------------------------------------------------------------------------------------------------------------------------|
| (Former PI)                |                                    |                                                                                                                  | <p>Muenchen, 81377 Germany.</p> <p>Chairperson- Prof. Dr. Wolfgang Eisenmenger</p>                                                                                                                                                       |
| Schaefers, Michael. Dr.med | 119143/040228                      | Dr. med. Michael Schaefers, Mercatorstreet 58, Duisburg, 47051 Germany.                                          | <p>Ethik-Kommission der Med. Fakultaeet der LMU Muenchen, Prof. Dr. med. Gustav Paumgartner, Klinikum der Universitaet Grosshadern Marchioninistreet 15, Muenchen, 81377 Germany.</p> <p>Chairperson- Prof. Dr. Wolfgang Eisenmenger</p> |
| Schleicher, Peter. Dr.med  | 114503/038547                      | Dr. med. Peter Schleicher, Praxis Dres. Bernd und Peter Schleicher, Breite Street 12, Schwandorf, 92421 Germany. | <p>Ethik-Kommission der Med. Fakultaeet der LMU Muenchen, Prof. Dr. med. Gustav Paumgartner, Klinikum der Universitaet Grosshadern Marchioninistreet 15, Muenchen, 81377 Germany.</p>                                                    |

**CONFIDENTIAL**

| <b>Investigator</b>      | <b>Investigator no./Center no.</b> | <b>Description of Research Facility, Hospital/ Institution, and Address</b>                                                          | <b>Name of IEC/IRB Committee, Address, Committee Chair</b>                                                                                                                                                                        |
|--------------------------|------------------------------------|--------------------------------------------------------------------------------------------------------------------------------------|-----------------------------------------------------------------------------------------------------------------------------------------------------------------------------------------------------------------------------------|
|                          |                                    |                                                                                                                                      | Chairperson- Prof. Dr. Wolfgang Eisenmenger                                                                                                                                                                                       |
| Schmidt, Marcus. Dr. med | 087247/030422                      | Dr. med. Marcus Schmidt, Klinikum der Johannes-Gutenberg Universitaet Mainz, Brustzentrum, Langenbeckstreet 1, Mainz, 55101 Germany. | Ethik-Kommission der Med. Fakultaeet der LMU Muenchen, Prof. Dr. med. Gustav Paumgartner, Klinikum der Universitaet Grosshadern Marchioninistreet 15, Muenchen, 81377 Germany.<br><br>Chairperson- Prof. Dr. Wolfgang Eisenmenger |
| Schmidt, Peter. Dr. med  | 056821/030423                      | Dr. med. Peter Schmidt, Praxis Dr. med. Peter Schmidt, Onkologische Schwerpunktpraxis, Hebbelstreet 2, Neunkirchen, 66538 Germany.   | Ethik-Kommission der Med. Fakultaeet der LMU Muenchen, Prof. Dr. med. Gustav Paumgartner, Klinikum der Universitaet Grosshadern Marchioninistreet 15, Muenchen, 81377 Germany.<br><br>Chairperson- Prof. Dr. Wolfgang Eisenmenger |

**CONFIDENTIAL**

| <b>Investigator</b>                                                                                    | <b>Investigator no./Center no.</b> | <b>Description of Research Facility, Hospital/ Institution, and Address</b>                                                                            | <b>Name of IEC/IRB Committee, Address, Committee Chair</b>                                                                                                                                                                        |
|--------------------------------------------------------------------------------------------------------|------------------------------------|--------------------------------------------------------------------------------------------------------------------------------------------------------|-----------------------------------------------------------------------------------------------------------------------------------------------------------------------------------------------------------------------------------|
| Schmitz, Stephan. PD Dr. med                                                                           | 092745/038203                      | PD Dr. med. Stephan Schmitz, Praxis fuer Haematologie und Onkologie, Sachsenring 69, Koeln, 50677 Germany.                                             | Ethik-Kommission der Med. Fakultaeet der LMU Muenchen, Prof. Dr. med. Gustav Paumgartner, Klinikum der Universitaet Grosshadern Marchioninistreet 15, Muenchen, 81377 Germany.<br><br>Chairperson- Prof. Dr. Wolfgang Eisenmenger |
| Schnappauf, Benjamin<br>von Minckwitz, Gunter (Former PI)<br>Schwedler, Kathrin. Dr.med<br>(Former PI) | 108355/031816                      | Klinikum der Johann-Wolfgang Goethe-Universitaet, Zentrum fuer Frauenheilkunde und Geburtshilfa, Theodor-Stern-Kai 7, , Frankfurt a. M, 60590 Germany. | Ethik-Kommission der Med. Fakultaeet der LMU Muenchen, Prof. Dr. med. Gustav Paumgartner, Klinikum der Universitaet Grosshadern Marchioninistreet 15, Muenchen, 81377 Germany.<br><br>Chairperson- Prof. Dr. Wolfgang Eisenmenger |
| Schneider, Achim. Dr. med.                                                                             | 058871/031807                      | Prof. Dr. med. Achim Schneider, Charite Universitaetsmedizin Berlin, Interdisziplinaeres                                                               | Ethik-Kommission der Med. Fakultaeet der LMU Muenchen, Prof. Dr. med. Gustav                                                                                                                                                      |



**CONFIDENTIAL**

| <b>Investigator</b>                  | <b>Investigator no./Center no.</b> | <b>Description of Research Facility, Hospital/ Institution, and Address</b>                                                                                       | <b>Name of IEC/IRB Committee, Address, Committee Chair</b>                                                                                                                                                                        |
|--------------------------------------|------------------------------------|-------------------------------------------------------------------------------------------------------------------------------------------------------------------|-----------------------------------------------------------------------------------------------------------------------------------------------------------------------------------------------------------------------------------|
|                                      |                                    | Brustzentrum. Campus Mitte, Charite Platz 1, Berlin, 10117 Germany.                                                                                               | Paumgartner, Klinikum der Universitaet Grosshadern Marchioninistreet 15, Muenchen, 81377 Germany.<br><br>Chairperson- Prof. Dr. Wolfgang Eisenmenger                                                                              |
| Schroeder, Jan. Dr. med.             | 091019/031808                      | Dr. med. Jan Schroeder, Gemeinschaftspraxis Dres. Schroeder und Sieg, Kettwigerstr. 62, 45473 Muelheim a.d.R, Germany.                                            | Ethik-Kommission der Med. Fakultaeet der LMU Muenchen, Prof. Dr. med. Gustav Paumgartner, Klinikum der Universitaet Grosshadern Marchioninistreet 15, Muenchen, 81377 Germany.<br><br>Chairperson- Prof. Dr. Wolfgang Eisenmenger |
| Schroeder, Willibald. Prof. Dr. Med* | 091023/030424                      | Herr Prof. Dr. med. Willibald Schroeder, Klinikum Bremen-Mitte gGmbH, Brustzentrum Klinikum Bremen-Mitte (ZKH), Street.-Juergen-Street. 1, Bremen, 28205 Germany. | Ethik-Kommission der Med. Fakultaeet der LMU Muenchen, Prof. Dr. med. Gustav Paumgartner, Klinikum der Universitaet Grosshadern Marchioninistreet 15,                                                                             |

**CONFIDENTIAL**

| Investigator              | Investigator no./Center no. | Description of Research Facility, Hospital/ Institution, and Address                                     | Name of IEC/IRB Committee, Address, Committee Chair                                                                                                                                                                                     |
|---------------------------|-----------------------------|----------------------------------------------------------------------------------------------------------|-----------------------------------------------------------------------------------------------------------------------------------------------------------------------------------------------------------------------------------------|
|                           |                             |                                                                                                          | <p>Muenchen, 81377 Germany.</p> <p>Chairperson- Prof. Dr. Wolfgang Eisenmenger</p>                                                                                                                                                      |
| Schulz, Volker. Dr.med    | 056814/030425               | Brustzentrum Kiel Mitte, Pruener Gang 7, Klel, 24103 Germany.                                            | <p>Ethik-Kommission der Med. Fakultaat der LMU Muenchen, Prof. Dr. med. Gustav Paumgartner, Klinikum der Universitaet Grosshadern Marchioninistreet 15, Muenchen, 81377 Germany.</p> <p>Chairperson- Prof. Dr. Wolfgang Eisenmenger</p> |
| Schulze, Mathias. Dr. med | 091031/030426               | Dr. med. Mathias Schulze, Praxis Dr. med. Mathias Schulze, Goerlitzer Street 10a, Zittau, 02763 Germany. | <p>Ethik-Kommission der Med. Fakultaat der LMU Muenchen, Prof. Dr. med. Gustav Paumgartner, Klinikum der Universitaet Grosshadern Marchioninistreet 15, Muenchen, 81377 Germany.</p>                                                    |

**CONFIDENTIAL**

| <b>Investigator</b>       | <b>Investigator no./Center no.</b> | <b>Description of Research Facility, Hospital/ Institution, and Address</b>                                               | <b>Name of IEC/IRB Committee, Address, Committee Chair</b>                                                                                                                                                                     |
|---------------------------|------------------------------------|---------------------------------------------------------------------------------------------------------------------------|--------------------------------------------------------------------------------------------------------------------------------------------------------------------------------------------------------------------------------|
|                           |                                    |                                                                                                                           | Chairperson- Prof. Dr. Wolfgang Eisenmenger                                                                                                                                                                                    |
| Selbach, Johannes. Dr.med | 091033/031809                      | Dr. med. Johannes Selbach, Praxis Dr. med. Johannes Selbach, Schreckerstr. 16, Duisburg, 47166 Germany.                   | Ethik-Kommission der Med. Fakultät der LMU Muenchen, Prof. Dr. med. Gustav Paumgartner, Klinikum der Universität Grosshadern Marchioninistreet 15, Muenchen, 81377 Germany.<br><br>Chairperson- Prof. Dr. Wolfgang Eisenmenger |
| Simon, Wolfgang. Dr. med  | 091036/031810                      | Prof. Dr. med. Wolfgang Simon, Robert-Bosch-Krankenhaus GmbH, Brustzentrum, Auerbachstreet 110, Stuttgart, 70376 Germany, | Ethik-Kommission der Med. Fakultät der LMU Muenchen, Prof. Dr. med. Gustav Paumgartner, Klinikum der Universität Grosshadern Marchioninistreet 15, Muenchen, 81377 Germany.<br><br>Chairperson- Prof. Dr. Wolfgang Eisenmenger |

**CONFIDENTIAL**

| <b>Investigator</b>                                         | <b>Investigator no./Center no.</b> | <b>Description of Research Facility, Hospital/ Institution, and Address</b>                                                                                  | <b>Name of IEC/IRB Committee, Address, Committee Chair</b>                                                                                                                                                                      |
|-------------------------------------------------------------|------------------------------------|--------------------------------------------------------------------------------------------------------------------------------------------------------------|---------------------------------------------------------------------------------------------------------------------------------------------------------------------------------------------------------------------------------|
| Solomayer, Erich. Dr.<br>Schmidt, Werner. Dr (Former PI)    | 179164/031805                      | Prof, Dr. med, Franz Erich Solomayar, Universitatsklinik des Saarlandes, Brustzentrum Homburg/Saar Kirrberger Strasse, Haus 9, Homburg, Saar, 66421 Germany. | Ethik-Kommission der Med. Fakultat der LMU Muenchen, Prof. Dr. med. Gustav Paumgartner, Klinikum der Universitaet Grosshadern Marchioninistreet 15, Muenchen, 81377 Germany.<br><br>Chairperson- Prof. Dr. Wolfgang Eisenmenger |
| Stefek, Andrea. Dr<br>Henschen, Stephan. Dr.med (Former PI) | 233396/030407                      | Johanniter KH Genthin Stendal gGmbH, Brustzentrum Altmark, Bahnhofstreet 24-26, Stendal, 39576 Germany.                                                      | Ethik-Kommission der Med. Fakultat der LMU Muenchen, Prof. Dr. med. Gustav Paumgartner, Klinikum der Universitaet Grosshadern Marchioninistreet 15, Muenchen, 81377 Germany.<br><br>Chairperson- Prof. Dr. Wolfgang Eisenmenger |
| Terhaag, Juergen. Dr.med                                    | 091046/031812                      | Dr. med. Juergen Terhaag, Kreiskrankenhaeuser Rottal-Inn gGmbH,                                                                                              | Ethik-Kommission der Med. Fakultat der LMU Muenchen, Prof. Dr. med. Gustav                                                                                                                                                      |

**CONFIDENTIAL**

| <b>Investigator</b>          | <b>Investigator no./Center no.</b> | <b>Description of Research Facility, Hospital/ Institution, and Address</b>                                            | <b>Name of IEC/IRB Committee, Address, Committee Chair</b>                                                                                                                                                                        |
|------------------------------|------------------------------------|------------------------------------------------------------------------------------------------------------------------|-----------------------------------------------------------------------------------------------------------------------------------------------------------------------------------------------------------------------------------|
|                              |                                    | Simonsoeder Allee 20, Eggenfelden, 84307 Germany.                                                                      | Paumgartner, Klinikum der Universitaet Grosshadern Marchioninistreet 15, Muenchen, 81377 Germany.<br><br>Chairperson- Prof. Dr. Wolfgang Eisenmenger                                                                              |
| Tessen, Hans Werner. Dr. med | 064531/030427                      | Dr. med. Hans Werner Tessen, Praxis Dr. med. Hans Werner Tessen, Koesliner Street 10b, Goslar, 38642 Germany.          | Ethik-Kommission der Med. Fakultaeet der LMU Muenchen, Prof. Dr. med. Gustav Paumgartner, Klinikum der Universitaet Grosshadern Marchioninistreet 15, Muenchen, 81377 Germany.<br><br>Chairperson- Prof. Dr. Wolfgang Eisenmenger |
| Thomalla, Joerg. Dr.med      | 102315/033634                      | Dr. med. Joerg Thomalla, Institut fur Versorgungsforschung in der Onkologie GbR, Neversstr. 5, Koblenz, 56068 Germany. | Ethik-Kommission der Med. Fakultaeet der LMU Muenchen, Prof. Dr. med. Gustav Paumgartner, Klinikum der Universitaet Grosshadern Marchioninistreet 15,                                                                             |

**CONFIDENTIAL**

| Investigator                 | Investigator no./Center no. | Description of Research Facility, Hospital/ Institution, and Address                                                                                                             | Name of IEC/IRB Committee, Address, Committee Chair                                                                                                                                                                                      |
|------------------------------|-----------------------------|----------------------------------------------------------------------------------------------------------------------------------------------------------------------------------|------------------------------------------------------------------------------------------------------------------------------------------------------------------------------------------------------------------------------------------|
|                              |                             |                                                                                                                                                                                  | <p>Muenchen, 81377 Germany.</p> <p>Chairperson- Prof. Dr. Wolfgang Eisenmenger</p>                                                                                                                                                       |
| Thomssen, Christoph. Dr. med | 040473/030428               | Herr Prof. Dr. med. Christoph Thomssen, Martin-Luther-Universitaet Halle-Wittenberg, Klinik und Poliklinik fuer Gynaekologie, Ernst-Grube-Street 40, Halle/Saale, 06097 Germany. | <p>Ethik-Kommission der Med. Fakultaeet der LMU Muenchen, Prof. Dr. med. Gustav Paumgartner, Klinikum der Universitaet Grosshadern Marchioninistreet 15, Muenchen, 81377 Germany.</p> <p>Chairperson- Prof. Dr. Wolfgang Eisenmenger</p> |
| Tulusan, Augustinus Dr. Med* | 037534/031813               | Prof. Dr. med. Augustinus Tulusan, Klinikum Bayreuth GmbH, Brustzentrum, Preuschwitzerstreet 101, Bayreuth, 95445 Germany.                                                       | <p>Ethik-Kommission der Med. Fakultaeet der LMU Muenchen, Prof. Dr. med. Gustav Paumgartner, Klinikum der Universitaet Grosshadern Marchioninistreet 15, Muenchen, 81377 Germany.</p>                                                    |

**CONFIDENTIAL**

| Investigator              | Investigator no./Center no. | Description of Research Facility, Hospital/ Institution, and Address                                                     | Name of IEC/IRB Committee, Address, Committee Chair                                                                                                                                                                            |
|---------------------------|-----------------------------|--------------------------------------------------------------------------------------------------------------------------|--------------------------------------------------------------------------------------------------------------------------------------------------------------------------------------------------------------------------------|
|                           |                             |                                                                                                                          | Chairperson- Prof. Dr. Wolfgang Eisenmenger                                                                                                                                                                                    |
| Uleer, Christoph. Dr.med  | 056819/031815               | Dr. med. Christoph Uleer, Praxis Dr. med. Christoph Uleer, Bahnhofplatz 5, Hildesheim, 31134 Germany.                    | Ethik-Kommission der Med. Fakultät der LMU Muenchen, Prof. Dr. med. Gustav Paumgartner, Klinikum der Universität Grosshadern Marchioninistreet 15, Muenchen, 81377 Germany.<br><br>Chairperson- Prof. Dr. Wolfgang Eisenmenger |
| Voigtmann, Rudolf. Dr.med | 112550/037384               | Prof. Dr. med. Rudolf Voigtmann, Technologiezentrum der Ruhr-Universität, Universitätsstreet 142, Bochum, 44799 Germany. | Ethik-Kommission der Med. Fakultät der LMU Muenchen, Prof. Dr. med. Gustav Paumgartner, Klinikum der Universität Grosshadern Marchioninistreet 15, Muenchen, 81377 Germany.<br><br>Chairperson- Prof. Dr. Wolfgang Eisenmenger |

**CONFIDENTIAL**

| <b>Investigator</b>                                      | <b>Investigator no./Center no.</b> | <b>Description of Research Facility, Hospital/ Institution, and Address</b>                                                                                        | <b>Name of IEC/IRB Committee, Address, Committee Chair</b>                                                                                                                                                                                      |
|----------------------------------------------------------|------------------------------------|--------------------------------------------------------------------------------------------------------------------------------------------------------------------|-------------------------------------------------------------------------------------------------------------------------------------------------------------------------------------------------------------------------------------------------|
| von Abel, Ekkehard. Dr.med<br>Schlicht, Erik (Former PI) | 096744/030421                      | Dr. med. Ekkehard von Abel, Kiinikum<br>Schwaebisch Gmuend Frauenkiinik,<br>Brustzentrum Schwaebisch Gmuend,<br>Wetzgauer Strasse 85, Mutlangen, 73557<br>Germany. | Ethik-Kommission der Med. Fakultaat der<br>LMU Muenchen, Prof. Dr. med. Gustav<br>Paumgartner, Klinikum der Universitaet<br>Grosshadern Marchioninistreet 15,<br>Muenchen, 81377 Germany.<br><br>Chairperson- Prof. Dr. Wolfgang<br>Eisenmenger |
| von Gruenhagen, Ulrich.<br>Dr.med                        | 091050/030430                      | Dr. med. Ulrich von Gruenhagen, Praxis Dr.<br>med. Ulrich von Gruenhagen, Bahnhofstr. 63,<br>Cottbus, 03046 Germany.                                               | Ethik-Kommission der Med. Fakultaat der<br>LMU Muenchen, Prof. Dr. med. Gustav<br>Paumgartner, Klinikum der Universitaet<br>Grosshadern Marchioninistreet 15,<br>Muenchen, 81377 Germany.<br><br>Chairperson- Prof. Dr. Wolfgang<br>Eisenmenger |
| Walther, Jochem. Dr.med                                  | 067705/031817                      | Dr.med. Jochem Walther, Haematologisch-<br>Onkologische Schwerpunktpraxis mit                                                                                      | Ethik-Kommission der Med. Fakultaat der<br>LMU Muenchen, Prof. Dr. med. Gustav                                                                                                                                                                  |



**CONFIDENTIAL**

| <b>Investigator</b>                                      | <b>Investigator no./Center no.</b> | <b>Description of Research Facility, Hospital/ Institution, and Address</b>                                  | <b>Name of IEC/IRB Committee, Address, Committee Chair</b>                                                                                                                                                                        |
|----------------------------------------------------------|------------------------------------|--------------------------------------------------------------------------------------------------------------|-----------------------------------------------------------------------------------------------------------------------------------------------------------------------------------------------------------------------------------|
|                                                          |                                    | Tagesklinik, Sonnenstreet 11, Muenchen, 80331 Germany.                                                       | Paumgartner, Klinikum der Universitaet Grosshadern Marchioninistreet 15, Muenchen, 81377 Germany.<br><br>Chairperson- Prof. Dr. Wolfgang Eisenmenger                                                                              |
| Bregulla, Markus<br>Weiss, Johann. Dr.med<br>(Former PI) | 192953/030431                      | Dr. Markus Bregulla, Praxis Dr. med. Bregulla, Friedrich Ebert Street 12 a, Weiden, 92637 Germany.           | Ethik-Kommission der Med. Fakultaeet der LMU Muenchen, Prof. Dr. med. Gustav Paumgartner, Klinikum der Universitaet Grosshadern Marchioninistreet 15, Muenchen, 81377 Germany.<br><br>Chairperson- Prof. Dr. Wolfgang Eisenmenger |
| Welslau, Manfred. Dr.med                                 | 091058/030432                      | Dr. med. Manfred Welslau<br>Praxis Dr. med. Manfred Welslau<br>Elisenstr. 2 6, 63739 Aschaffenburg, Germany. | Ethik-Kommission der Med. Fakultaeet der LMU Muenchen, Prof. Dr. med. Gustav Paumgartner, Klinikum der Universitaet Grosshadern Marchioninistreet 15,                                                                             |

**CONFIDENTIAL**

| Investigator            | Investigator no./Center no. | Description of Research Facility, Hospital/ Institution, and Address                               | Name of IEC/IRB Committee, Address, Committee Chair                                                                                                                                                                                   |
|-------------------------|-----------------------------|----------------------------------------------------------------------------------------------------|---------------------------------------------------------------------------------------------------------------------------------------------------------------------------------------------------------------------------------------|
|                         |                             |                                                                                                    | <p>Muenchen, 81377 Germany.</p> <p>Chairperson- Prof. Dr. Wolfgang Eisenmenger</p>                                                                                                                                                    |
| Wetzel, Kuno. Dr.med    | 116544/039520               | Dr. med. Kuno Wetzel, Praxis Dr. med. Kuno Wetzel, Helsunger Street 7, Blankenburg, 38889 Germany. | <p>Ethik-Kommission der Med. Fakultät der LMU Muenchen, Prof. Dr. med. Gustav Paumgartner, Klinikum der Universität Grosshadern Marchioninistreet 15, Muenchen, 81377 Germany.</p> <p>Chairperson- Prof. Dr. Wolfgang Eisenmenger</p> |
| Wiest, Wolfgang. Dr.med | 091059/030433               | Katholisches Klinikum Mainz, Brustzentrum, An der Goldgrube 11, Mainz, 55131 Germany.              | <p>Ethik-Kommission der Med. Fakultät der LMU Muenchen, Prof. Dr. med. Gustav Paumgartner, Klinikum der Universität Grosshadern Marchioninistreet 15, Muenchen, 81377 Germany.</p>                                                    |

**CONFIDENTIAL**

| <b>Investigator</b>      | <b>Investigator no./Center no.</b> | <b>Description of Research Facility, Hospital/ Institution, and Address</b>                                           | <b>Name of IEC/IRB Committee, Address, Committee Chair</b>                                                                                                                                                                     |
|--------------------------|------------------------------------|-----------------------------------------------------------------------------------------------------------------------|--------------------------------------------------------------------------------------------------------------------------------------------------------------------------------------------------------------------------------|
|                          |                                    |                                                                                                                       | Chairperson- Prof. Dr. Wolfgang Eisenmenger                                                                                                                                                                                    |
| Wilke, Jochen. Dr.med    | 091060/030434                      | Dr. med. Jochen Wilke, Praxis Dr. med. Jochen Wilke, Jakob Henle Street 1, Fuerth, 90766 Germany                      | Ethik-Kommission der Med. Fakultät der LMU Muenchen, Prof. Dr. med. Gustav Paumgartner, Klinikum der Universität Grosshadern Marchioninistreet 15, Muenchen, 81377 Germany.<br><br>Chairperson- Prof. Dr. Wolfgang Eisenmenger |
| <b>Greece</b>            |                                    |                                                                                                                       |                                                                                                                                                                                                                                |
| Georgoulas, Vassilis. MD | 002886/031401                      | Medical Oncology Department, University Hospital of Heraklion, Stavrakion and Voutes street Heraklion, 71201, Greece. | National Drug Organisation (NGO) 284, Mesogion Avenue 15562, Holargos, Greece.<br>Chairperson- Ioannis Tountas<br><br>National Ethics Committee (NEC)<br>284, Mesogion Avenue, 15562, Holargos, Greece.                        |

**CONFIDENTIAL**

| <b>Investigator</b>          | <b>Investigator no./Center no.</b> | <b>Description of Research Facility, Hospital/ Institution, and Address</b>                            | <b>Name of IEC/IRB Committee, Address, Committee Chair</b>                                                                                                                                                                                     |
|------------------------------|------------------------------------|--------------------------------------------------------------------------------------------------------|------------------------------------------------------------------------------------------------------------------------------------------------------------------------------------------------------------------------------------------------|
|                              |                                    |                                                                                                        | Chairperson- Konstantinos Dimopoulos                                                                                                                                                                                                           |
| Kontzoglou, Konstantinos. MD | 103794/034299                      | 2nd Surgery Clinic, General Hospital of Athens "Laiko", 17 Agiou Thoma street, Athens, 11527, Greece.  | National Drug Organisation (NGO) 284, Mesogion Avenue 15562, Holargos, Greece.<br>Chairperson- Ioannis Tountas<br><br>National Ethics Committee (NEC)<br>284, Mesogion Avenue 15562, Holargos, Greece.<br>Chairperson- Konstantinos Dimopoulos |
| Mylonakis, Nikolaos. MD      | 084803/031404                      | "METAXA' General Cancer Hospital, 2nd Internal Medicine Clinic, 51 Botasi Street, Athens18537, Greece. | National Drug Organisation (NGO) 284, Mesogion Avenue 15562, Holargos, Greece.<br>Chairperson- Ioannis Tountas<br><br>National Ethics Committee (NEC)<br>284, Mesogion Avenue 15562, Holargos, Greece.<br>Chairperson- Konstantinos Dimopoulos |

**CONFIDENTIAL**

| <b>Investigator</b>              | <b>Investigator no./Center no.</b> | <b>Description of Research Facility, Hospital/ Institution, and Address</b>                                                                                 | <b>Name of IEC/IRB Committee, Address, Committee Chair</b>                                                                                                                                                                                            |
|----------------------------------|------------------------------------|-------------------------------------------------------------------------------------------------------------------------------------------------------------|-------------------------------------------------------------------------------------------------------------------------------------------------------------------------------------------------------------------------------------------------------|
| Syrgos, Konstantinos. MD,<br>PhD | 109576/036015                      | General Hospital of Chest Diseases of Athens<br>"Sotiria" 3rd University Pathology Clinic-<br>Oncology Unit, 152 Mesogeion Avenue, 11527<br>Athens, Greece. | National Drug Organisation (NGO) 284,<br>Mesogion Avenue 15562, Holargos, Greece.<br>Chairperson- Ioannis Tountas<br><br>National Ethics Committee (NEC)<br>284, Mesogion Avenue 15562, Holargos,<br>Greece.<br>Chairperson- Konstantinos Dimopoulos. |
| Varthalitis, Ioannis. MD         | 105609/035140                      | Oncology Clinic General Hospital of Chania,<br>Mournies Chania 733 00, Greece.                                                                              | National Drug Organisation (NGO) 284,<br>Mesogion Avenue 15562, Holargos, Greece.<br>Chairperson- Ioannis Tountas.<br><br>National Ethics Committee (NEC) 284,<br>Mesogion Avenue 15562, Holargos, Greece.<br>Chairperson- Konstantinos Dimopoulos.   |
| Zografos, Georgios. MD           | 104326/035141                      | General Hospital of Athens "Ippokratio" A'<br>Propaedeutic Surgery University Clinic 114<br>Vas. Sofias Avenue, Athens 11527, Greece.                       | National Drug Organisation (NGO) 284,<br>Mesogion Avenue 15562, Holargos, Greece.<br>Chairperson- Ioannis Tountas.                                                                                                                                    |

**CONFIDENTIAL**

| <b>Investigator</b>                                   | <b>Investigator no./Center no.</b> | <b>Description of Research Facility, Hospital/ Institution, and Address</b>                                                     | <b>Name of IEC/IRB Committee, Address, Committee Chair</b>                                                                                                                             |
|-------------------------------------------------------|------------------------------------|---------------------------------------------------------------------------------------------------------------------------------|----------------------------------------------------------------------------------------------------------------------------------------------------------------------------------------|
|                                                       |                                    |                                                                                                                                 | National Ethics Committee (NEC)<br>284, Mesogion Avenue 15562, Holargos, Greece.<br>Chairperson- Konstantinos Dimopoulos.                                                              |
| <b>Hong Kong</b>                                      |                                    |                                                                                                                                 |                                                                                                                                                                                        |
| Chow, Louis. MBBS, MS                                 | 041380/029948                      | UNIMED Medical Institute Comprehensive Centre for Breast Disease, 10/F Luk Kwok Centre, 72 Gloucester Road, Wanchai, Hong Kong. | UNIMED Medical Institute Institutional Review Board, Department of Clinical Oncology, PB-115, Queen Mary Hospital, 102 Pokfulam Road, Hong Kong<br><br>Chairperson: Dr. Ashely Cheng   |
| Liang, Raymond. MD<br>Epstein Richard. MD (Former PI) | 061340/029946                      | Department of Medicine, Queen Mary Hospital, 102 Pokfulam Road, Hong Kong.                                                      | Institutional Review Board of the Univesity of Hong Kong/Hospital Authority Hong Kong West Cluster, Room 901, Administration Block, Queen Mary Hospital, 102 Pokfulam Road, Hong Kong. |

**CONFIDENTIAL**

| <b>Investigator</b>  | <b>Investigator no./Center no.</b> | <b>Description of Research Facility, Hospital/ Institution, and Address</b>                             | <b>Name of IEC/IRB Committee, Address, Committee Chair</b>                                                                                                                                                                                                                         |
|----------------------|------------------------------------|---------------------------------------------------------------------------------------------------------|------------------------------------------------------------------------------------------------------------------------------------------------------------------------------------------------------------------------------------------------------------------------------------|
|                      |                                    |                                                                                                         | Chairperson: Dr. Virginia Wong                                                                                                                                                                                                                                                     |
| Yeo, Winnie. MD      | 041381/029947                      | Department of Clinical Oncology, Prince of Wales Hospital, 30-32 Ngan Shing Street, Shatin, Hong Kong.  | Joint CUHK-New Territories East Cluster Clinical Research Ethics Committee, Centre for Clinical Research Trials and Epidemiological Research, 5/F School of Public Health, Prince of Wales Hospital, 30-32 Ngan Shing Street, Shatin, Hong Kong.<br><br>Chairperson: Dr Benny ZeeZ |
| <b>Hungary</b>       |                                    |                                                                                                         |                                                                                                                                                                                                                                                                                    |
| Kahan, Zsuzsanna. MD | 084500/049544                      | Szent-Gyorgyi Albert Klinikai Kozpont, Onkoterasias Klinika, Koranyl faszor 12, H-6720 Szeged, Hungary. | Egeszsegugyi Tudomanyos Tanacs, Klinikofarmakologlai Etikai Bizottsaga, Arany J. u. 6-8, Budapest- 1051, Hungary.<br>Chairperson- Zsuzsanna Furst<br><br>Orszagos Gyogyszereszeti Intezet, 1051 Budapest, Zriyni u. 3, Hungary.                                                    |

**CONFIDENTIAL**

| <b>Investigator</b> | <b>Investigator no./Center no.</b> | <b>Description of Research Facility, Hospital/ Institution, and Address</b>                                               | <b>Name of IEC/IRB Committee, Address, Committee Chair</b>                                                                                                                                                                                                         |
|---------------------|------------------------------------|---------------------------------------------------------------------------------------------------------------------------|--------------------------------------------------------------------------------------------------------------------------------------------------------------------------------------------------------------------------------------------------------------------|
|                     |                                    |                                                                                                                           | Chairperson- Zsuzsanna Fürst                                                                                                                                                                                                                                       |
| Kammerer, Kinga. MD | 057358/033197                      | Pest Megyei Flor Ferenc Korhaz, Onkologia Osztaly, Klstarca H-2143, Semmelweis ter 1 Hungary.                             | Egeszsegugyi Tudomanyos Tanacs,<br>Klinikofarmakologlai Etikai Bizottsaga, Arany J. u. 6-8, Budapest- 1051, Hungary.<br>Chairperson- Zsuzsanna Fürst<br><br>Orszagos Gyogyszereszeti Intezet, 1051 Budapest, Zriyni u. 3, Hungary.<br>Chairperson- Zsuzsanna Fürst |
| Magyar, Tamás*. MD  | 101279/033200                      | Fovarosi Onkormanyzat Peterfy, Sandor Utcai Korhaza, Onkologiai Osztaly, Peterfy sandor u. 8-20 H-1076 Budapest, Hungary. | Egeszsegugyi Tudomanyos Tanacs,<br>Klinikofarmakologlai Etikai Bizottsaga, Arany J. u. 6-8, Budapest- 1051, Hungary.<br>Chairperson- Zsuzsanna Fürst<br><br>Orszagos Gyogyszereszeti Intezet, 1051 Budapest, Zriyni u. 3, Hungary.<br>Chairperson- Zsuzsanna Fürst |



**CONFIDENTIAL**

| <b>Investigator</b>                                       | <b>Investigator no./Center no.</b> | <b>Description of Research Facility, Hospital/ Institution, and Address</b>                   | <b>Name of IEC/IRB Committee, Address, Committee Chair</b>                                                                                                                                                                                                      |
|-----------------------------------------------------------|------------------------------------|-----------------------------------------------------------------------------------------------|-----------------------------------------------------------------------------------------------------------------------------------------------------------------------------------------------------------------------------------------------------------------|
| Pápai, Zsuzsanna. MD                                      | 101270/033202                      | Allami Egészségügyi Központ, Klinikai Onkologia, 1062 Budapest, Podmaniczky u.111, Hungary    | Egészségügyi Tudományos Tanács, 1051 Budapest, Arany János u. 6-8. Hungary.<br>Chairperson- Zsuzsanna Fürst                                                                                                                                                     |
| Pintér, Tamás. MD                                         | 086060/033198                      | Petz Aladar Megyei Oktató Kórház, Onkológiai Osztály, H-9024 Győr, Zrínyi u., 13. Hungary.    | Egészségügyi Tudományos Tanács, Klinikofarmakológiai Etikai Bizottsága, Arany J. u. 6-8, Budapest- 1051, Hungary.<br>Chairperson- Zsuzsanna Fürst<br><br>Országos Gyógyszerészeti Intézet, 1051 Budapest, Zrínyi u. 3, Hungary.<br>Chairperson- Zsuzsanna Fürst |
| Somogyiné Ezer, Eva. MD<br>Gyórfy, Károly. MD (Former PI) | 112332/033201                      | Kaposi Mór Megyei Kórház, Onkológiai Osztály Kaposvár H- 7400, Tallian Gy. U. 20-32, Hungary. | Egészségügyi Tudományos Tanács, 1051 Budapest, Arany János u. 6-8. Hungary.<br><br>Chairperson- Zsuzsanna Fürst                                                                                                                                                 |
| Varga, Zsuzsanna. MD                                      | 101275/033203                      | Pécsi Tudományegyetem KK, Onkoterápiás Intézet H-7624 Pécs, Edesanyak útja 17. Hungary.       | Egészségügyi Tudományos Tanács Klinikai Farmakológiai Etikai Bizottsága H-1051, Budapest Arany János u. 6-8, Hungary.                                                                                                                                           |

**CONFIDENTIAL**

| <b>Investigator</b>      | <b>Investigator no./Center no.</b> | <b>Description of Research Facility, Hospital/ Institution, and Address</b>                                                                                                      | <b>Name of IEC/IRB Committee, Address, Committee Chair</b>                                                                                                          |
|--------------------------|------------------------------------|----------------------------------------------------------------------------------------------------------------------------------------------------------------------------------|---------------------------------------------------------------------------------------------------------------------------------------------------------------------|
|                          |                                    |                                                                                                                                                                                  | Chairperson- Zsuzsanna Fürst                                                                                                                                        |
| <b>India</b>             |                                    |                                                                                                                                                                                  |                                                                                                                                                                     |
| Digumarti, Raghunadharao | 070469/030964                      | Department of Medical Oncology, # 607 E Block, 6th Floor, Medical Oncology Dept., Nizam's Institute of Medical Sciences, Panjagutla, Hyderabad - 500 082, Andhra Pradesh, India. | Institutional Ethics Committee, Nizam's Institute of Medical Sciences, Panjagutla, Hyderabad - 500 082, Andhra Pradesh, India.<br><br>Chairperson: Dr. K. Ramaswamy |
| Jain, Minish             | 096956/048057                      | Grand Medical Foundation's Ruby Hall Clinic, new Cancer Building, Third Floor, 40, Sassoon Road, Pune -411001, Maharashtra, India.                                               | Poona Medical Foundation's Ruby Hall Clinic, 40, Sassoon Road, Pune -411001, Maharashtra, India.<br><br>Chairperson: Mr. B. P. Shaligram                            |
| Koppiker, Chaitanyanand  | 127783/045124                      | Jehangir Clinical Development Centre Pvt Ltd, Jehangir Hospital Premises, 32 Sasson Road, Puna 411001, Maharashtra, India.                                                       | Jehangir Clinical Developmental Centre (JCDC), Jehangir Hospital, 32 Sasson Road, Pune 411001, Maharashtra, India.<br><br>Chairperson: Dr. Ravindra Ghool           |

**CONFIDENTIAL**

| <b>Investigator</b> | <b>Investigator no./Center no.</b> | <b>Description of Research Facility, Hospital/ Institution, and Address</b>                                                     | <b>Name of IEC/IRB Committee, Address, Committee Chair</b>                                                                                                                                                                           |
|---------------------|------------------------------------|---------------------------------------------------------------------------------------------------------------------------------|--------------------------------------------------------------------------------------------------------------------------------------------------------------------------------------------------------------------------------------|
| Maru, Anish         | 267058/041919                      | SEAROC Cancer Centre, S. K. Soni Hospital Sector 5, Vidyadhar Nagar, Sikar Road, Jaipur- 302013, Rajasthan, India.              | SEAROC Ethics Committee, SEAROC Cancer Centre., S. K. Soni Hospital, Sector 5, Vidyadhar Nagar, Sikar Road, Jaipur- 302013, Rajasthan, India.<br><br>Chairperson: Mr. P. C. Jain                                                     |
| Nair, Reena         | 103833/034251                      | Tata Memorial Centre, Department of Medical Oncology, Dr. Ernest Borges Road, Mumbai, 400012 India.                             | Institutional Reveiw Board, Tata Memorial Hospital, 3rd Floor, CRS, Main BUilding, Dr. Ernest Borges Road,Parel, Mumbai - 400012, Maharashtra, India.<br><br>Chairperson: Dr. Madhuri Gore and Dr. Urmila Thatte ( HEC-1 and HEC-2 ) |
| Raina, Vinod        | 086107/034253                      | Dr. B R. A Institute Rotary Cancer Hospital, All India Institute of Medical Sciences, Ansari Nagar<br>New Delhi- 110029, India. | Standing Ethics Committee, All Indio Institute of Medical Sciences (AIIMS), Ansari Nagar, New Delhi 110029, India.<br><br>Chairperson: Prof J. P. Wali                                                                               |

**CONFIDENTIAL**

| <b>Investigator</b>            | <b>Investigator no./Center no.</b> | <b>Description of Research Facility, Hospital/ Institution, and Address</b>                       | <b>Name of IEC/IRB Committee, Address, Committee Chair</b>                                                                                                             |
|--------------------------------|------------------------------------|---------------------------------------------------------------------------------------------------|------------------------------------------------------------------------------------------------------------------------------------------------------------------------|
| Raja, Thirumalairaj            | 086740/033875                      | Apollo Speciality Hospital, Padma Complex, 320, Mount Road, Chennai - 600 006, Tamil Nadu, India. | The Ethics Committee, Apollo Hospitals Enterprise Limited, 21, Greams lane, Off Greams Road, Chennai- 600 006, Tamil Nadu, India.<br><br>Chairperson: Mr. S. Narayanan |
| <b>Israel</b>                  |                                    |                                                                                                   |                                                                                                                                                                        |
| Barak (Berestechko), Frida. MD | 002430/032464                      | Oncology Unit, Barzilai Medical Center, 2 Hahistadrut St, Ashkelon 78278, Israel.                 | Institutional Review Board, Barzilai Medical Center, 2 Hahistadrut St, Ashkelon 78278, Israel.<br><br>Chairperson- Gil Luggasi                                         |
| Efrat (Ben-Baruch), Noa. MD    | 061547/032466                      | Department of Oncology, Kaplan Medical Center, P.O. Box 1, Rehovot, Israel.                       | Institutional Review Board, Kaplan Medical Center. P.O. Box 1. Rehovot, Israel.<br><br>Chairperson- Avraham Eliraz and Lidia Arcavi                                    |
| Inbar, Moshe. MD               | 071923/032467                      | Oncology division, Breast Cancer unit. Tel Aviv                                                   | Helsinki Committee, Tel Aviv Sourasky MC. 6                                                                                                                            |

**CONFIDENTIAL**

| <b>Investigator</b>                                                       | <b>Investigator no./Center no.</b> | <b>Description of Research Facility, Hospital/ Institution, and Address</b>                                  | <b>Name of IEC/IRB Committee, Address, Committee Chair</b>                                                                                    |
|---------------------------------------------------------------------------|------------------------------------|--------------------------------------------------------------------------------------------------------------|-----------------------------------------------------------------------------------------------------------------------------------------------|
| Jiveliouk, Irina. MD (Fomer PI)<br>Yaal-Hahoshen, Neora. MD<br>(Fomer PI) |                                    | Sourasky MC, 6 Weizman Street Tel Aviv<br>64239, Israel.                                                     | Weizman street. Tel Aviv 64239, Israel.<br><br>Chairperson- Topilsky Marcel                                                                   |
| Kaufman, Bella. MD                                                        | 061545/032463                      | Oncology division, Breast Cancer unit, Sheba<br>medical center, Ramat Gan 52621 Israel.                      | Oncology division, Breast Cancer unit, Sheba<br>medical center, Ramat Gan 52621 Israel.<br><br>Chairperson- Dror Haratz and<br>Ruth Harduf    |
| Nisenbaum, Bella. MD                                                      | 106953/035255                      | Oncology Institute, Meir Medical Center, 59<br>Tsharnichovski Street. Kfar-Saba 44281,<br>Israel.            | Institutional Review Board, Meir Medical<br>Center, 59 Tsharnichovski Street. Kfar-Saba<br>44281, Israel.<br><br>Chairperson- Yitshal Brener. |
| Peretz-Yablonski, Tamar. MD                                               | 089259/032465                      | Sharett institute of Oncology, Hadassah-<br>Hebrew University Medical Center, Jerusalem,<br>91120<br>Israel. | Helsinki Committee<br>Sharett institute of Oncology<br>Hadassah-Hebrew University Medical Center,<br>Jerusalem, 91 120 Israel.                |

**CONFIDENTIAL**

| <b>Investigator</b>   | <b>Investigator no./Center no.</b> | <b>Description of Research Facility, Hospital/ Institution, and Address</b>                                                | <b>Name of IEC/IRB Committee, Address, Committee Chair</b>                                                                                                                                                                                                             |
|-----------------------|------------------------------------|----------------------------------------------------------------------------------------------------------------------------|------------------------------------------------------------------------------------------------------------------------------------------------------------------------------------------------------------------------------------------------------------------------|
|                       |                                    |                                                                                                                            | Chairperson- Jacques Michel.                                                                                                                                                                                                                                           |
| Steiner, Marianna. MD | 117211/050799                      | Oncology department, Carmel medical center/<br>Lin medical center, 7 Michal Street, Haifa,<br>Israel.                      | Helsinki committee, Oncology department,<br>Carmel medical center, Haifa, Israel.<br><br>Chairperson- Ruth Kitzes.                                                                                                                                                     |
| <b>Italy</b>          |                                    |                                                                                                                            |                                                                                                                                                                                                                                                                        |
| Cavanna, Luigi. MD    | 095729/030578                      | Azienda Unita Sanataria Locale di Piacenza,<br>Oncologia Medica ed Ematologia Via Taverna,<br>49<br>29100 Piacenza, Italy. | Comitato di Bioetica, Azienda USL N.1<br>Sassari, Via Monte Grappa, 82 07100<br>Sassari, Italy.<br><br>Chairperson- Dr. Michele Poddighe.<br><br>Comitato Etico dell' ASL di Piacenza, Via<br>Taverna, 49, 29100 Piacenza, Italy.<br><br>Chairperson- Prof. Enzo Poli. |
| Del Mastro, Lucia.MD  | 096442/031006                      | Lucia Del Mastro, MD Istituto Nazionale per la<br>Ricerca sul Cancro Oncologia Medica A Largo                              | Comitato di Bioetica, Azienda USL N.1<br>Sassari, Via Monte Grappa, 82 07100                                                                                                                                                                                           |

**CONFIDENTIAL**

| <b>Investigator</b> | <b>Investigator no./Center no.</b> | <b>Description of Research Facility, Hospital/ Institution, and Address</b>                                                                            | <b>Name of IEC/IRB Committee, Address, Committee Chair</b>                                                                                                                                                                                                                                                                       |
|---------------------|------------------------------------|--------------------------------------------------------------------------------------------------------------------------------------------------------|----------------------------------------------------------------------------------------------------------------------------------------------------------------------------------------------------------------------------------------------------------------------------------------------------------------------------------|
|                     |                                    | Rosanna Benzi, 10 16132 Genova Italy.                                                                                                                  | <p>Sassari, Italy.<br/>Chairperson- Dr. Michele Poddighe</p> <p>Comitato Etico, Istituto di Ricerca a Carattere Scientific - IST<br/>Largo R. Benzi, 10 16132 Genova Italy.<br/>Chairperson- Prof. Paolo Pronzato</p>                                                                                                            |
| Gori, Stefania. MD  | 038511/030990                      | <p>Stefania Gori, MD Azienda Ospedaliera di Perugia<br/>S.C. di Oncologia Medica, Ospedale R. Silverstrini Via G. Dottori, 1 06132 Perugia, Italy.</p> | <p>Comitato di Bioetica, Azienda USL N.1 Sassari, Via Monte Grappa, 82 07100 Sassari, Italy.<br/>Chairperson- Dr. Michele Poddighe.</p> <p>Comitato Etico delle Aziende, Sanitarie dell'Umbria Segreteria Scientifico- Amministrativa, Centro Commerciale La Galleria Il Piano, Int. 37 Via Gramsci, 6 06132 Perugia, Italy.</p> |

**CONFIDENTIAL**

| <b>Investigator</b>                                        | <b>Investigator no./Center no.</b> | <b>Description of Research Facility, Hospital/ Institution, and Address</b>                                                                          | <b>Name of IEC/IRB Committee, Address, Committee Chair</b>                                                                                                                                                                                                                                                                        |
|------------------------------------------------------------|------------------------------------|------------------------------------------------------------------------------------------------------------------------------------------------------|-----------------------------------------------------------------------------------------------------------------------------------------------------------------------------------------------------------------------------------------------------------------------------------------------------------------------------------|
|                                                            |                                    |                                                                                                                                                      | Chairperson- Prof. Adolfo Puxeddu.                                                                                                                                                                                                                                                                                                |
| Gridelli, Cesare. MD                                       | 030281/030577                      | Cesare Gridelli, MD U.O. di Oncologia Medica. Azienda Ospedaliera S. G. Moscati, Contrada Amoretta - Cittadella, Ospedaliera - 83100 Avellino Italy. | Comitato di Bioetica, Azienda USL N.1 Sassari, Via Monte Grappa, 82 07100 Sassari, Italy.<br><br>Chairperson- Dr. Michele Poddighe.<br><br>Comitato Etico dell'Azienda Ospedaliem S. Giuseppe Moscati<br>c/o Contrada Amoretta - CitM Ospedaliem - Pal. Uffici, 831 00 Avellino, Italy.<br><br>Chairperson- Dr. Stefano La Verde. |
| Sarobba, Giuseppina<br><br>Farris, Antonio. MD (Former PI) | 061259/030372                      | Antonio Farris, MD Cattedra Oncologia Medica, Universita di Sassari, Viale San Pietro, 8 07100 Sassari, Italy.                                       | Comitato di Bioetica, Azienda USL N.1 Sassari, Via Monte Grappa, 82 07100 Sassari, Italy.<br><br>Chairperson- Dr. Michele Poddighe.                                                                                                                                                                                               |



**CONFIDENTIAL**

| <b>Investigator</b>       | <b>Investigator no./Center no.</b> | <b>Description of Research Facility, Hospital/ Institution, and Address</b>                                                | <b>Name of IEC/IRB Committee, Address, Committee Chair</b>                                                                                                                                                                                                                            |
|---------------------------|------------------------------------|----------------------------------------------------------------------------------------------------------------------------|---------------------------------------------------------------------------------------------------------------------------------------------------------------------------------------------------------------------------------------------------------------------------------------|
| Venturini, Marco. MD      | 094697/030377                      | Marco Venturini, MD A.O. Sacro Cuore - Don Calabria Reparto di Oncologia Via Don A. Sempreboni, 5 37024 Negrar (VR) Italy. | Comitato di Bioetica, Azienda USL N.1 Sassari, Via Monte Grappa, 82 07100 Sassari, Italy.<br>Chairperson- Dr. Michele Poddighe<br><br>Comitato di Etica Ospedale "Sacro Cuore - Don Calabria"<br>Via Don Sempreboni, 5 37024 Negrara (VR) Italy.<br>Chairperson- Dr. Fabrizio Nicolis |
| <b>Korea</b>              |                                    |                                                                                                                            |                                                                                                                                                                                                                                                                                       |
| Im, Young-Hyuck. MD, Ph.D | 029133/030536                      | 135-710 .50. Ilwon-Dong, Kangnam-Ku, Seoul, Korea, Samsung Medical Center. Korea.                                          | Institutional Review Board of Samsung Medical Center. 135-710 .50. Ilwon-Dong, Kangnam-Ku, Seoul, Korea.<br><br>Chairperson: Lee, Suk-Koo.                                                                                                                                            |
| Kim, Sung-Bae. MD, Ph.D   | 086110/030535                      | Asan Medical Center, 388-1, Poongnap-dong, Songpa-ku, Seoul, 138-736, Korea.                                               | Institutional Review Board of Asan Medical Center, 388-1, Poongnap-dong, Songpa-ku,                                                                                                                                                                                                   |

**CONFIDENTIAL**

| Investigator           | Investigator no./Center no. | Description of Research Facility, Hospital/ Institution, and Address                                        | Name of IEC/IRB Committee, Address, Committee Chair                                                                                                                                                         |
|------------------------|-----------------------------|-------------------------------------------------------------------------------------------------------------|-------------------------------------------------------------------------------------------------------------------------------------------------------------------------------------------------------------|
|                        |                             |                                                                                                             | Seoul, 138-736, Korea.<br><br>Chairperson: Sang Koo Lee.                                                                                                                                                    |
| Kim, Tae-You. MD, Ph.D | 093249/030539               | Seoul National University Hospital, 101 Daehang-ro (28 Yeongeon-dong), J ongno-gu, Seoul, 110-744, Korea.   | Seoul National University Hospital Institutional Review Board, Seoul National University Hospital, 101 Daehang-ro (28 Yeongeon-dong), Jongno-gu, Seoul, 110-744, Korea.<br><br>Chairperson: Jae-Seung Paick |
| Lee, Keun Seok. MD     | 142961/085924               | National Cancer Center, 809 Madu1-dong, lisandong-gu, Goyang city, Gyeonggi-do, 411-769, Republic of Korea. | Institutional Review Board of National Cancer Center, 809 Madu1-dong, lisandong-gu, Goyang city, Gyeonggi-do, 411-769, Republic of Korea.<br><br>Chairperson: Kim, Heung Tae                                |

**CONFIDENTIAL**

| <b>Investigator</b>  | <b>Investigator no./Center no.</b> | <b>Description of Research Facility, Hospital/ Institution, and Address</b>                   | <b>Name of IEC/IRB Committee, Address, Committee Chair</b>                                                                                                                                                 |
|----------------------|------------------------------------|-----------------------------------------------------------------------------------------------|------------------------------------------------------------------------------------------------------------------------------------------------------------------------------------------------------------|
| <b>Lativa</b>        |                                    |                                                                                               |                                                                                                                                                                                                            |
| Purkalne, Gunta. MD  | 000832/032397                      | P. Stradina kus, Pilsonu iela 13, Riga, LV 1002, Latvia.                                      | Paula stradina klīniskās universitātes slimnīcas attīstības fonda zāļu un farmaceitisko produktu izpēti, Etikas komiteja, Pilsonu iela 13, Riga, LV 1002 Latvia.<br><br>Chairperson- Mr. Peteris Stradins. |
| Skrodele, Maija. MD  | 037869/032399                      | Piejuras slimnīca, onkoloģiskā klīnika Jūrmalas iela 2, Iepāja. LV 3401, Latvia.              | Paula stradina klīniskās universitātes slimnīcas attīstības fonda zāļu un farmaceitisko produktu izpēti, Etikas komiteja, Pilsonu iela 13, Riga, LV 1002 Latvia.<br><br>Chairperson- Mr. Peteris Stradins. |
| Zvirbule, Zanete. MD | 037867/032396                      | Rīgas austrumu slimnīca, latvijas onkoloģijas centrs, Hipokrāta iela 4 Riga, LV 1079, Latvia. | Paula stradina klīniskās universitātes slimnīcas attīstības biedrības klīniskās izpēti etikas komiteja, Pilsonu iela 13, Riga, LV                                                                          |

**CONFIDENTIAL**

| <b>Investigator</b>        | <b>Investigator no./Center no.</b> | <b>Description of Research Facility, Hospital/ Institution, and Address</b>                                            | <b>Name of IEC/IRB Committee, Address, Committee Chair</b>                                                                       |
|----------------------------|------------------------------------|------------------------------------------------------------------------------------------------------------------------|----------------------------------------------------------------------------------------------------------------------------------|
|                            |                                    |                                                                                                                        | 1002, Latvia.<br><br>Chairperson- Mr. Peteris Stradins.                                                                          |
| <b>Lithuania</b>           |                                    |                                                                                                                        |                                                                                                                                  |
| Cesnaviciene, Irmante      | 093701/031055                      | Klaipeda Hospital, Oncology Department, Liepojos 49, LT-92288, Klaipeda, Lithuania.                                    | Lithuanian Bioethics Committee, Didzioji Street. 22, LT-01128 Vilnius, Lithuania.<br><br>Chairperson- Mr. Eugenijus Gefenas.     |
| Grigiene, Ruta. MD, Ph.D   | 084792/035846                      | Vilnius University Oncology Institute, Chemo and Radiotherapy Department, Santariskiu 1, LT-08660, Vilnius, Lithuania. | Lithuanian Bioethics Committee<br>Didzioji Street. 22, LT-01128 Vilnius<br>Lithuania.<br><br>Chairperson- Mr. Eugenijus Gefenas. |
| Inciura, Arturas. MD, Ph.D | 096632/031056                      | Kaunas Medical University Hospital, Oncology Clinic Eiveniu 2, LT-50009, Kaunas<br>Lithuania.                          | Lithuanian Bioethics Committee<br>Didzioji Street. 22, LT-01128 Vilnius<br>Lithuania.<br><br>Chairperson- Mr. Eugenijus Gefenas. |

**CONFIDENTIAL**

| <b>Investigator</b>                                                             | <b>Investigator no./Center no.</b> | <b>Description of Research Facility, Hospital/ Institution, and Address</b>                                                | <b>Name of IEC/IRB Committee, Address, Committee Chair</b>                                                                                                                                                   |
|---------------------------------------------------------------------------------|------------------------------------|----------------------------------------------------------------------------------------------------------------------------|--------------------------------------------------------------------------------------------------------------------------------------------------------------------------------------------------------------|
| <b>Mexico</b>                                                                   |                                    |                                                                                                                            |                                                                                                                                                                                                              |
| Arce-Salinas, Claudia-Haydee. MD                                                | 093465/030282                      | Instituto Nacional de Cancerologia, Av San Fernando No.22 Colonia Seccion XVI Del. Tlalpan, Mexico City, CP 14080, Mexico. | Comite Bioetico y Comite Cientifico, Instituto Nacional de Cancerologia, Av. San Fernando No. 22 Col. Secc. XVI, Del. Tlalpan, Mexico city, 14080, Mexico.<br><br>Chairperson: Dr. Luis A. Herrera Montalvo. |
| Brito-Villanueva, William Orlando. MD<br>Suárez-Sahui, Tirzo. MD<br>(Former PI) | 132700/030281                      | Hospital Regional ISSSTE Mérida, Calle 7 S/N X 36 Col. Pensiones, Mérida, Yucatán, 97500, Mexico.                          | Comite de Investigacion y Bloetica, Hospital Regional ISSSTE Mérida, Calle 7 S/N X 36 Col. Pensiones, Mérida, Yucatán, 97500, Mexico.<br><br>Chairperson: Dr Miguel Angel Serapio Hernández.                 |
| Lugo Quintana, Roberto Sergio. MD                                               | 032785/030283                      | Hospital Christus Muguerza del Parque, Calle Dr Pedro Leal Rodriguez 1802, Col. Santa Rita, Chihuahua, 31000, Mexico.      | Comite de Etica e Investigacion Christus Muguerza del Parque SA de CV, Calle Dr. Pedro Leal Rodriguez 1802, Col. Santa Rita, Chihuahua, 31000, Chih Mexico.                                                  |

**CONFIDENTIAL**

| <b>Investigator</b>                                                                                                      | <b>Investigator no./Center no.</b> | <b>Description of Research Facility, Hospital/ Institution, and Address</b>                                                                                            | <b>Name of IEC/IRB Committee, Address, Committee Chair</b>                                                                                                                                                                                                           |
|--------------------------------------------------------------------------------------------------------------------------|------------------------------------|------------------------------------------------------------------------------------------------------------------------------------------------------------------------|----------------------------------------------------------------------------------------------------------------------------------------------------------------------------------------------------------------------------------------------------------------------|
|                                                                                                                          |                                    |                                                                                                                                                                        | Chairperson: Dr. Miguel Ángel de la Peña.                                                                                                                                                                                                                            |
| Olivares-Beltran, Guillermo. MD                                                                                          | 122237/042822                      | Centro Medico ABC, Sur 132 #108 Consultorio 605, Col Las Americas, Del. Alvaro Obregon,Cp 01120 Mexico DF Mexico.                                                      | Comite de Etica y Comite Institucional de Investigacion, Centro Medico ABC, Sur 132 #108 Consultorio 605, Col Las Americas, Del. Alvaro Obregon,Cp 01120 Mexico OF Mexico.<br><br>Chairperson: Dr Bernardo Tanur-Tatz                                                |
| Sánchez Forgach, Ernesto. MD<br>Pérez Puentes, Ancizar. MD<br>(Former PI)<br>Martinez Prieto, Marcela. MD<br>(Former PI) | 098299/031848                      | Centro de Estudios Mastologicos S,A de C V, Avenida Paseo de la Reforma Numero 155, 1er piso, Col. Lomas de Chepultepec, Delegacion Miguel Hidalgo, DF, 11000, Mexico. | Fundacion para la Investigacion y Ensenanza Medica, Instituto de Glneco Obstetricia y de Perinatologia S A de C V, Paseo Alexander von Humboldt No. 88 3' Seccion de. Lomas Verdes, 63120, Naucalpan, Estado de Mexico, Mexico.<br><br>Chairperson: Dr. Fernando Rio |

**CONFIDENTIAL**

| <b>Investigator</b>                         | <b>Investigator no./Center no.</b> | <b>Description of Research Facility, Hospital/ Institution, and Address</b>                              | <b>Name of IEC/IRB Committee, Address, Committee Chair</b>                                                                                                     |
|---------------------------------------------|------------------------------------|----------------------------------------------------------------------------------------------------------|----------------------------------------------------------------------------------------------------------------------------------------------------------------|
|                                             |                                    |                                                                                                          | de la Loza.                                                                                                                                                    |
| <b>New Zealand</b>                          |                                    |                                                                                                          |                                                                                                                                                                |
| Fitzharris, Bernard. MB ChB, FRACP          | 088221/037021                      | Oncology Service, Christchurch Hospital, Riccarton Avenue, Christchurch 8001, New Zealand.               | Mutli-Region Ethics Committee, Ministry of Health, Level 2, Reception, 1-3 The Terrace, Wellington, 6011, New Zealand.<br><br>Chairperson: Mr Hector Matthews. |
| Harvey, Vernon. MBBS, MD, FRACP, MRCS, MRCP | 035472/036332                      | Department of Oncology, Level 6, Auckland City Hospital, Park Road, Grafton 1023, Auckland, New Zealand. | Mutli-Region Ethics Committee, Ministry of Health, Level 2, Reception, 1-3 The Terrace, Wellington, 6011, New Zealand.<br><br>Chairperson: Mr Hector Matthews. |
| Kuper-Hommel, Marion. MD                    | 096201/042954                      | Regional Cancer Centre, Waikato Hospital. Pembroke Street, Hamilton 2001, New Zealand.                   | Mutli-Region Ethics Committee, Ministry of Health, Level 2, Reception, 1-3 The Terrace, Wellington, 6011, New Zealand.<br><br>Chairperson: Mr Hector Matthews. |

**CONFIDENTIAL**

| <b>Investigator</b>             | <b>Investigator no./Center no.</b> | <b>Description of Research Facility, Hospital/ Institution, and Address</b>                               | <b>Name of IEC/IRB Committee, Address, Committee Chair</b>                                                                                                                      |
|---------------------------------|------------------------------------|-----------------------------------------------------------------------------------------------------------|---------------------------------------------------------------------------------------------------------------------------------------------------------------------------------|
| <b>Peru</b>                     |                                    |                                                                                                           |                                                                                                                                                                                 |
| Gomez, Henry MD                 | 053310/030387                      | Instituto Nacional de Enfermedades Neoplásicas, Av. Angamos Este 2520, Lima 34, Peru.                     | Comite de Etica en Investigacion Biomedica, Instituto Nacional de Enfermedades Neoplásicas, Av. Angamos Este 2520, Lima 34, Peru.<br><br>Chairperson: Ronaldo Calderon Velasco. |
| Hurtado de Mendoza, Fernando MD | 073419/030388                      | Hospital Nacional Edgardo Rebagliati Martins, Av. Edgardo Rebagliati No. 490, Jesus Maria, Lima 11, Peru. | Comite De Etica Del Hospital Nacional Edgardo Rebagliatti Martins, Av. Edgardo Rebagliati No. 490, Jesus Maria, Lima 11, Peru.<br><br>Chairperson: Julio Cesar Alfaro Mantilla  |
| Salas, Fernando MD              | 073397/031268                      | Hopital Nacional Guillermo Almenara Irigoyen, Av.Grau 800 - La Victoria, Lima 13, Peru.                   | Hopital Nacional Guillermo Almenara Irigoyen, Av.Grau 800 - La Victoria, Lima 13, Peru.<br><br>Chairperson: Demetrio Molero Castro                                              |



**CONFIDENTIAL**

| <b>Investigator</b>  | <b>Investigator no./Center no.</b> | <b>Description of Research Facility, Hospital/ Institution, and Address</b>                                                               | <b>Name of IEC/IRB Committee, Address, Committee Chair</b>                                                                                                                        |
|----------------------|------------------------------------|-------------------------------------------------------------------------------------------------------------------------------------------|-----------------------------------------------------------------------------------------------------------------------------------------------------------------------------------|
| <b>Philippines</b>   |                                    |                                                                                                                                           |                                                                                                                                                                                   |
| Chan, Valorie MD     | 062411/031277                      | Veterans Memorial Medical Center,<br>Department of Oncology, Research Centre,<br>North Avenue, Diliman, Quezon City, 1110<br>Philippines. | Research and Ethtcs Committee, Veterans<br>Memorial Medical Center, North Avenue,<br>Diliman, Quezon City, 1110 Philippines.<br><br>Chairperson: Tito C. Atienza, MD              |
| Igama, Jasmin MD     | 095633/031392                      | Baguio General Hospital and Medical Center,<br>Department of Medicine, Governor Pack Road,<br>Baguio City, Benguet, 2600, Philippines.    | Ethics Review Commitee, Baguio General<br>Hospital and Medical Center, Governor Pack<br>Road, Baguio City, Benguet, 2600<br>Philippines.<br><br>Chairperson: Concessa Padilla, MD |
| Tiangco, Beatrice MD | 093514/031005                      | The Medical City, Unit 405, Medical Arts Tower<br>Inc., Ortigas Avenue, Pasig City, 1600<br>Philippines.                                  | Research Ethics Review Board, The Medical<br>City, Ortigas Avenue, Pasig City, 1600<br>Philippines.<br><br>Chairperson: Milagros T. Jocson, MD                                    |

**CONFIDENTIAL**

| <b>Investigator</b>                                         | <b>Investigator no./Center no.</b> | <b>Description of Research Facility, Hospital/ Institution, and Address</b>                                                                                         | <b>Name of IEC/IRB Committee, Address, Committee Chair</b>                                                                                                            |
|-------------------------------------------------------------|------------------------------------|---------------------------------------------------------------------------------------------------------------------------------------------------------------------|-----------------------------------------------------------------------------------------------------------------------------------------------------------------------|
| Tudtud, Dennis Ramon MD                                     | 096488/031279                      | Hospice Care and Patient Centre, Suite 803, SPC Medical Specialty Center, Gorordo Avenue, Cebu, 6000 Philippines.                                                   | Bioethics Committee, Perpetual Succour Hospital, SPC Medical Specialty Center, Gorordo Avenue, Cebu, 6000 Philippines.<br><br>Chairperson: Ellie May Villegas, MD     |
| <b>Poland</b>                                               |                                    |                                                                                                                                                                     |                                                                                                                                                                       |
| Cedrych, Ida. MD<br>Rolski, Janusz. MD, Ph.D<br>(Former PI) | 216372/030393                      | Centrum Onkologii, Instytut im. Marii Skłodowskiej-Curie, Oddział w Krakowie, Klinika Nowotworow Układowych i Uogólnionych ul. Gamcarska 11, 31-115 Krakow, Poland. | Komisja Bioetyczna przy Okregowej Warminsko-Mazurskiej Izbie Lekarskiej w Olsztynie, ul. Zolnierska 16, 10-591 Olsztyn, Poland.<br><br>Chairperson- Zdzisław Piesiak. |
| Chmielowska, Ewa. MD, Ph.D                                  | 141958/050927                      | Centrum Onkologii, Oddział Kliniczny Onkologii, ul. Izabeli Romanowskiej 2, 85-796 Bydgoszcz, Poland.                                                               | Komisja Bioethczna przy Okregowej Warminsko-Mazurskiej Izbie Lekarskiej w Olsztynie, ul. Zolnierska 16, 10-591 Olsztyn, Poland.<br><br>Chairperson- Zdzisław Piesiak. |

**CONFIDENTIAL**

| <b>Investigator</b>                        | <b>Investigator no./Center no.</b> | <b>Description of Research Facility, Hospital/ Institution, and Address</b>                                                  | <b>Name of IEC/IRB Committee, Address, Committee Chair</b>                                                                                                            |
|--------------------------------------------|------------------------------------|------------------------------------------------------------------------------------------------------------------------------|-----------------------------------------------------------------------------------------------------------------------------------------------------------------------|
| Jagiello-Grusfeld, Agnieszka.<br>MD, Ph.D* | 040529/030394                      | ZOZ MSWiA z Warminsko-Mazurskim Centrum Onkologii, ul. Wojska Polskiego 37 10-288 Olsztyn, Poland.                           | Komisja Bioetyczna przy Okregowej Warminsko-Mazurskiej Izbie Lekarskiej w Olsztynie, ul. Zolnierska 16, 10-591 Olsztyn, Poland.<br><br>Chairperson- Zdzisław Piesiak. |
| Jagiello-Grusfeld, Agnieszka.<br>MD, Ph.D  | 040529/055845                      | ONKO-MED. Oddzial Onkologii, ul. Wojska Polskiego 30, 10-226 Olsztyn, Poland.                                                | Komisja Bioethczna przy Okregowej Warminsko-Mazurskiej Izbie Lekarskiej w Olsztynie, ul. Zolnierska 16, 10-591 Olsztyn, Poland.<br><br>Chairperson- Zdzisław Piesiak. |
| Sawrycki, Piotr. MD                        | 133877/049563                      | Wojewodzki Szpital Zespolony Im Ludwika Rydygiera, Oddzial Onkologii Klinicznej, ul. Sw. Jozefa 53/59, 87-100 Torun, Poland. | Komisja Bioethczna przy Okregowej Warminsko-Mazurskiej Izbie Lekarskiej w Olsztynie, ul. Zolnierska 16, 10-591 Olsztyn, Poland.<br><br>Chairperson- Zdzisław Piesiak. |

**CONFIDENTIAL**

| <b>Investigator</b>                                               | <b>Investigator no./Center no.</b> | <b>Description of Research Facility, Hospital/ Institution, and Address</b>                            | <b>Name of IEC/IRB Committee, Address, Committee Chair</b>                                                                                                                                                                                                                                         |
|-------------------------------------------------------------------|------------------------------------|--------------------------------------------------------------------------------------------------------|----------------------------------------------------------------------------------------------------------------------------------------------------------------------------------------------------------------------------------------------------------------------------------------------------|
| Szczylik, Cezary. MD, Ph.D                                        | 084603/ 030392                     | Klinika Onkologii, Wojskowy Instytut Medyczny, Szaserow 128, 00-909 Warszawa, Poland.                  | Komisja Bioetyczna przy, Okregowej Warmnsko- Mazurskiej Izbie Lekarskiej w Olszynie, ul. Zolnierska 16, 10-591 Olsztyn, Poland.<br><br>Chairperson- Zdzisław Piesiak                                                                                                                               |
| <b>Russia</b>                                                     |                                    |                                                                                                        |                                                                                                                                                                                                                                                                                                    |
| Andreeva, Elena. MD<br>Korman, David. MD, Ph.D, DM<br>(Former PI) | 054296/033142                      | GUZ City Clinical Hospital # 40, Chemotherapy Department, 7, Kasatkina street, Moscow, 129301, Russia. | The Ethics Committee attached to GUZ City Clinical Hospital # 40, 7, Kasatkina street, Moscow, 129301, Russia.<br><br>Chairperson- R.I.Shaburov.<br><br>Ethics Council, Ministry of Healthcare and social development of the Russian Federation, 3, Rahmanovskij pereulok, Moscow, 127994, Russia. |

**CONFIDENTIAL**

| <b>Investigator</b>              | <b>Investigator no./Center no.</b> | <b>Description of Research Facility, Hospital/ Institution, and Address</b>                                    | <b>Name of IEC/IRB Committee, Address, Committee Chair</b>                                                                                                                                                                                                                                                                                                       |
|----------------------------------|------------------------------------|----------------------------------------------------------------------------------------------------------------|------------------------------------------------------------------------------------------------------------------------------------------------------------------------------------------------------------------------------------------------------------------------------------------------------------------------------------------------------------------|
|                                  |                                    |                                                                                                                | Deputy Chairperson – N.A. Mikhailova.                                                                                                                                                                                                                                                                                                                            |
| Cheporov, Sergey. MD             | 087820/033144                      | GUZ YO Regional Ciinical Oncology Hospital, 4A, ui.Chkalova, Yaroslavl, 150054, Russia.                        | The Ethcis Committee attached to the Federal Agency for Control of Quality of Medicinal Product, 8, Petrovsky Boulevard, Build 3, Moscow, 127051, Russia.<br><br>Chairperson- K.I. Tebloev.                                                                                                                                                                      |
| Dobrovolskaya, Natalya. MD, Ph.D | 041623/033136                      | FGU Russian Roentgeno-Radiology Research Center of Roszdrav. 86. Profsouznaya Street., Moscow. 117997, Russia. | The Ethics Committee attached to FGU Russian Roentgeno-Radiology Research Center of Roszdrav, 86, Profsouznaya Street., Moscow, 117997, Russia.<br><br>Chairperson- G.A. Panshin.<br><br>Ethics Council attached to the Ministry of Healthcare of Russian Federation, 127051, Moscow, Petrovsky bulvar, 8, bldn. 2.<br><br>Deputy Chairperson – N.A. Mikhailova. |

**CONFIDENTIAL**

| <b>Investigator</b>                | <b>Investigator no./Center no.</b> | <b>Description of Research Facility, Hospital/ Institution, and Address</b>                                                                                | <b>Name of IEC/IRB Committee, Address, Committee Chair</b>                                                                                                                                                                                                                                                                                                        |
|------------------------------------|------------------------------------|------------------------------------------------------------------------------------------------------------------------------------------------------------|-------------------------------------------------------------------------------------------------------------------------------------------------------------------------------------------------------------------------------------------------------------------------------------------------------------------------------------------------------------------|
| Manikhas, Alexey. MD, Ph.D         | 041569/033138                      | SPbGUZ City Clinical Oncology Dispensary, 3/5, 2nd Berezovaya alleya, St-Petersburg, 197022, Russia.                                                       | <p>The Ethics Committee attached to the SPbGUZ City Clinical Oncology Dispensary, 3/5, 2nd Berezovaya alleya, St-Petersburg, 197022, Russia.</p> <p>Chairperson- A.V. Pavlysh.</p> <p>Ethics Council attached to the Ministry of Healthcare of Russian Federation, 127051, Moscow, Petrovsky bulvar, 8, bldn. 2.</p> <p>Deputy Chairperson – N.A. Mikhailova.</p> |
| Semiglazov, Vladimir. MD, Ph.D, DM | 040179/033141                      | GUN Scientific Research Institute of Oncology n.a. prof. N.N.Petrov of Roszdrav, 68. Leningradskaya Street., Saint Petersburg, Pesochny-2, 197758, Russia. | <p>The Ethics Committee attached to the GUN Scientific Research Institute of Oncology n.a. prof. N.N.Petrov of Roszdrav, 68, Leningradskaya Street., Saint Petersburg, Pesochny-2, 197758, Russia.</p> <p>Chairperson- E.V Dyomin</p>                                                                                                                             |

**CONFIDENTIAL**

| Investigator                   | Investigator no./Center no. | Description of Research Facility, Hospital/ Institution, and Address                       | Name of IEC/IRB Committee, Address, Committee Chair                                                                                                                                                                                                                                                                                            |
|--------------------------------|-----------------------------|--------------------------------------------------------------------------------------------|------------------------------------------------------------------------------------------------------------------------------------------------------------------------------------------------------------------------------------------------------------------------------------------------------------------------------------------------|
|                                |                             |                                                                                            | <p>Ethics Council attached to the Ministry of Healthcare of Russian Federation, 127051, Moscow, Petrovsky bulvar, 8, bldn. 2.</p> <p>Deputy Chairperson – N.A. Mikhailova.</p>                                                                                                                                                                 |
| Shomova, Marina. MD, Ph.D, DM  | 101133/033151               | GUS Regional Clinical Oncology Dispensary. 13 Sportivnaya Street, Ryazan, 39001 1, Russia. | <p>The Ethics Committee attached to the GUZ Regional Clinical Oncology Dispensary, 13 Sportivnaya Street, Ryazan, 390011, Russia. Chairperson- A.I. Smirnov</p> <p>Ethics Council attached to the Ministry of Healthcare of Russian Federation, 127051, Moscow, Petrovsky bulvar, 8, bldn. 2.</p> <p>Deputy Chairperson – N.A. Mikhailova.</p> |
| Tjulandin, Serey. MD, Ph.D, DM | 082721/033135               | GU Russian Oncology Scientific Center n.a. N.N.Blokhin RAMS, Department of Clinical        | The Ethics Committee attached to GU Russian Oncology Scientific Center n.a. N.N,                                                                                                                                                                                                                                                               |

**CONFIDENTIAL**

| Investigator         | Investigator no./Center no. | Description of Research Facility, Hospital/ Institution, and Address                                 | Name of IEC/IRB Committee, Address, Committee Chair                                                                                                                                                                                  |
|----------------------|-----------------------------|------------------------------------------------------------------------------------------------------|--------------------------------------------------------------------------------------------------------------------------------------------------------------------------------------------------------------------------------------|
|                      |                             | Pharmacology and Chemotherapy. 24, Kashirskoye shosse. Moscow, 115478, Russia.                       | <p>Blokhin RAMS, 24, Kashirskoye shosse, Moscow, 115478, Russia.</p> <p>Chairperson- D.Z. Kuptchan<br/>Ethics Council attached to the Ministry of Healthcare of Russian Federation.</p> <p>Deputy Chairperson – N.A. Mikhailova.</p> |
| <b>Slovakia</b>      |                             |                                                                                                      |                                                                                                                                                                                                                                      |
| Chovanec, Jozef. MD  | 041224/032870               | Department of Oncology, Hospital with Policlinics Bardejov, Sv.Jakuba 21, 08501 Bardejov I Slovakia. | <p>Ethics Committee Hospltal with Policlinics Bardejov, Sv. Jakuba 21, 085 01 Bardejov.</p> <p>Chairperson- Martina Suchova, MD, PhD</p>                                                                                             |
| Koza, Ivan. MD, DrSC | 038176/032865               | National Cancer Institute, Klenova 1, 833 10 Bratislava / Slovakia.                                  | <p>Institutional Review Board of National Cancer Institute, Klenova 1, 833 10 Bratislava / Slovakia.</p> <p>Chairperson- Kristina Krizanova, MD.</p>                                                                                 |



**CONFIDENTIAL**

| <b>Investigator</b>       | <b>Investigator no./Center no.</b> | <b>Description of Research Facility, Hospital/ Institution, and Address</b>                                     | <b>Name of IEC/IRB Committee, Address, Committee Chair</b>                                                                                                                                                                                                |
|---------------------------|------------------------------------|-----------------------------------------------------------------------------------------------------------------|-----------------------------------------------------------------------------------------------------------------------------------------------------------------------------------------------------------------------------------------------------------|
| Pritzova, Eva. MD         | 014023/032863                      | Dspartment of Oncology, F.D. Roosevelt's Faculcy Hospital, Nam. L Svobodu 1, 976 17 Banska Bystrica / Slovakia. | Ethics Cornmittse F.D. Roosevelt's Faculcy Hospital, Nam, L. Svobodu 1, 975 17 Banske Bystrica, Slovakia.<br><br>Chairperson- Juraj Svac, MD, PhD.                                                                                                        |
| Stresko, Marian. MD       | 100655/032864                      | Department of Radiotherapy and Medical Oncology, Faculcy Hospital Nilra, Spitalska 6, 94901 Nitra Slovakia.     | Ethics Committee Faculcy Hospital Nitra, Spitalska 6, 94901, Nitra/ Slovakia.<br><br>Chairperson- Maria Goboova, PharmDr.                                                                                                                                 |
| <b>South Africa</b>       |                                    |                                                                                                                 |                                                                                                                                                                                                                                                           |
| Barnardt, Pieter. MB, ChB | 094137/030131                      | Tygerberg Hospital, Gene Louw Building Francie van Zijl Drive, Tygerberg 7505, South Africa.                    | University of Stellenbosch Committee for Pharmaceutical Trials, Office for Pharmaceutical Trials, Research, Development and Support, Room 500BA, Teaching Block, Francie van Zijl Drive Tygerberg 7505, South Africa.<br><br>Chairperson: Dr WAJ Meintjes |

**CONFIDENTIAL**

| <b>Investigator</b>                                                     | <b>Investigator no./Center no.</b> | <b>Description of Research Facility, Hospital/ Institution, and Address</b>                                          | <b>Name of IEC/IRB Committee, Address, Committee Chair</b>                                                                                                    |
|-------------------------------------------------------------------------|------------------------------------|----------------------------------------------------------------------------------------------------------------------|---------------------------------------------------------------------------------------------------------------------------------------------------------------|
| Coetzee, Corlia. MB<br><br>Raats, Johannes. MB, ChB,<br>PhD (Former PI) | 148550/030134                      | GVI Oncology Clinical Research Unit, Tiger Ave, Windsor Park, Kraaifontein, Western Cape 7570<br><br>South Africa.   | University of the Witwatersrand Human Research Ethics Committee, 8 Blackwood Avenue, Parktown, 2193, South Africa.<br><br>Chairperson: Prof PE Cleaton Jones  |
| Cohen, Graham. MB, ChB,<br>FCP(SA)                                      | 025585/030132                      | Mary Potter Oncology Centre, Little Company of Mary Hospital, Totlus Street Groenkloof, Pretoria, 0181 South Africa. | University of the Witwatersrand Human Research Ethics Committee, 8 Blackwood Avenue, Parktown, 2193, South Africa.<br><br>Chairperson: Prof PE Cleaton Jones. |
| Jones, Lee-Ann. MB, ChB,<br>(FC(Rad Onc)                                | 093602/030140                      | Langenhoven Drive Oncology Centre, 1 Mangold street Newtown Park, Port Elizabeth, 6045 South Africa.                 | University of the Witwatersrand Human Research Ethics Committee, 8 Blackwood Avenue, Parktown, 2193, South Africa.<br><br>Chairperson: Prof PE Cleaton Jones. |
| Landers, Gregory. MB,<br>ChB,MMed                                       | 034241/030141                      | The Oncology Centre, 535 Peter Mokaba Road, Overport, Durban, 4091, South Africa.                                    | University of the Witwatersrand Human Research Ethics Committee, 8 Blackwood Avenue, Parktown, 2193, South Africa.                                            |

**CONFIDENTIAL**

| <b>Investigator</b>                         | <b>Investigator no./Center no.</b> | <b>Description of Research Facility, Hospital/ Institution, and Address</b>                                                                                | <b>Name of IEC/IRB Committee, Address, Committee Chair</b>                                                                                                    |
|---------------------------------------------|------------------------------------|------------------------------------------------------------------------------------------------------------------------------------------------------------|---------------------------------------------------------------------------------------------------------------------------------------------------------------|
|                                             |                                    |                                                                                                                                                            | Chairperson: Prof PE Cleaton Jones                                                                                                                            |
| Rapoport, Bernardo. MD                      | 093006/030135                      | The Medical Oncology Centre of Rosebank, 129 Oxford Road, Cm Oxford & Northwold rds Saxonwold, 2196 South Africa.                                          | University of the Witwatersrand Human Research Ethics Committee, 8 Blackwood Avenue, Parktown, 2193, South Africa.<br><br>Chairperson: Prof PE Cleaton Jones. |
| Ruff, Paul. MB, Bch, MMed(Int Med), FCP(SA) | 023258/030136                      | University of Witwatersrand, Faculty of Health Sciences, Dept Medical Oncology, Johannesburg Hospital, Area 495, 7 York Road, Parkiown, 2193 South Africa. | University of the Witwatersrand Human Research Ethics Committee, 8 Blackwood Avenue, Parktown, 2193, South Africa.<br><br>Chairperson: Prof PE Cleaton Jones. |
| Ruff, Paul. MB, Bch, MMed(Int Med), FCP(SA) | 023258/030137                      | University Witwatersrand Oncology, 17 and 18 Etan Road, Parktown, 2193, South Africa.                                                                      | University of the Witwatersrand Human Research Ethics Committee, 8 Blackwood Avenue, Parktown, 2193, South Africa.<br><br>Chairperson: Prof PE Cleaton Jones. |

**CONFIDENTIAL**

| <b>Investigator</b>                                  | <b>Investigator no./Center no.</b> | <b>Description of Research Facility, Hospital/ Institution, and Address</b>                                        | <b>Name of IEC/IRB Committee, Address, Committee Chair</b>                                                                                                          |
|------------------------------------------------------|------------------------------------|--------------------------------------------------------------------------------------------------------------------|---------------------------------------------------------------------------------------------------------------------------------------------------------------------|
| Szpak, Waldemar. MB.<br>Pirjol, Anca. MB (Former PI) | 093176/030133                      | Dr's Pirjol & Szpak Private Oncology Practice,<br>315 Ipahla Road, Athlone Park Amanzimtoti,<br>4126 South Africa. | University of the Witwatersrand Human<br>Research Ethics Committee, 8 Blackwood<br>Avenue, Parktown, 2193, South Africa.<br><br>Chairperson: Prof PE Cleaton Jones. |
| Vorobiof, Daniel. MD                                 | 051420/030130                      | Sandton Oncology Centre, 159 Rivonia Rd<br>Morningside, Sandton 2199, South Africa.                                | University of the Witwatersrand Human<br>Research Ethics Committee, 8 Blackwood<br>Avenue, Parktown, 2193, South Africa.<br><br>Chairperson: Prof PE Cleaton Jones. |
| <b>Spain</b>                                         |                                    |                                                                                                                    |                                                                                                                                                                     |
| Albanell, Joan. MD, PhD                              | 041436/030501                      | Hospital del Mar. Paseo Maritimo 25-29,<br>Ed.Itaca, 08003 Barcelona, Spain.                                       | Comite Etico dellstituto Municipal de<br>Asistencia Sanitaria (IMIM), C/ Doctor<br>Aiguader 80, 08003 Barcelona, Spain.<br><br>Chairperson- Magí Farré Albaladejo.  |
| Ales, Jose E. MD, PhD                                | 030076/030496                      | Hospital Ruber Internacional. Servicio dn<br>Oncologia Medica, C/La Maso 38 28034                                  | Comite Etico de Investigacion Clinica,<br>Hospital Ruber Internacional, Servicio dn                                                                                 |

**CONFIDENTIAL**

| <b>Investigator</b>     | <b>Investigator no./Center no.</b> | <b>Description of Research Facility, Hospital/ Institution, and Address</b>                      | <b>Name of IEC/IRB Committee, Address, Committee Chair</b>                                                                                                                                                                                                                                                                                                                                         |
|-------------------------|------------------------------------|--------------------------------------------------------------------------------------------------|----------------------------------------------------------------------------------------------------------------------------------------------------------------------------------------------------------------------------------------------------------------------------------------------------------------------------------------------------------------------------------------------------|
|                         |                                    | Madrid, Spain.                                                                                   | <p>Oncologia Medica, C/La Maso 38 28034 Madrid, Spain.</p> <p>Chairperson- Angel Ruiz de Aguiar.</p>                                                                                                                                                                                                                                                                                               |
| Anton, Antonio. MD, PhD | 010554/030482                      | Hospital Miguel Servet, Servicio de Oncologia, P° Isabel la Catolica 1-3, 50009 Zaragoza, Spain. | <p>CEIC Hospital Miguel Servet. Avda. Gomez Laguna 25, planta 3.50009 Zaragoza, Spain.</p> <p>Chairperson- María González Hinjos.</p> <p>Comite Etico de Investigacion Clinica, Hospital Universitario de Bellvitge C/Feixa Llarga s/n (Frente a Urgencias), Edificio Fundacio August PI i Sunyer 08907 Hospitalet de Llobregat (Barcelona), Spain.</p> <p>Chairperson- María González Hinjos.</p> |

**CONFIDENTIAL**

| <b>Investigator</b>                                              | <b>Investigator no./Center no.</b> | <b>Description of Research Facility, Hospital/ Institution, and Address</b>                                    | <b>Name of IEC/IRB Committee, Address, Committee Chair</b>                                                                                                                                                                                                                                                                                                                                                                     |
|------------------------------------------------------------------|------------------------------------|----------------------------------------------------------------------------------------------------------------|--------------------------------------------------------------------------------------------------------------------------------------------------------------------------------------------------------------------------------------------------------------------------------------------------------------------------------------------------------------------------------------------------------------------------------|
| <p>Avella Mestre, Antoni. MD<br/>Rifá, Julio. MD (Former PI)</p> | <p>125166/030484</p>               | <p>Hospital Universitari Son Espases, Ctra. de Valldemossa 79, 07010 Palma de Mallorca Spain.</p>              | <p>Comite Etico de Investigacion Clinica, Hospital Universitario de Bellvitge, Edificio de Consultas Externas, planta 1º C/Feixa Llarga s/n, 08907 Hospitalet de Llobregat, Barcelona, Spain.</p> <p>Chairperson- Joan Bargay Lleonat.</p> <p>Llles Balears Clinical Research Ethics Committee, Conselleria de Salut i Consum, C/ Cecil Metel 18, 07003 Palma de Mallorca, Spain.</p> <p>Chairperson- Joan Bargay Lleonat.</p> |
| <p>Batista, Jose. MD, PhD</p>                                    | <p>010323/030485</p>               | <p>Hospital Universitario de Canarias, Servicio de Oncotogia, C/Offa sin. La Laguna 38320 Tenerife, Spain.</p> | <p>Comite Etico de Investigaci6n Clinica del Hospital Universitario de Canarias CI Ofra s/n- La Cuesta, Pabe116n de Gobierno 31</p>                                                                                                                                                                                                                                                                                            |

**CONFIDENTIAL**

| <b>Investigator</b>                                          | <b>Investigator no./Center no.</b> | <b>Description of Research Facility, Hospital/ Institution, and Address</b>                                               | <b>Name of IEC/IRB Committee, Address, Committee Chair</b>                                                                                                                                                                                                                                                                                                                                                                                                                                         |
|--------------------------------------------------------------|------------------------------------|---------------------------------------------------------------------------------------------------------------------------|----------------------------------------------------------------------------------------------------------------------------------------------------------------------------------------------------------------------------------------------------------------------------------------------------------------------------------------------------------------------------------------------------------------------------------------------------------------------------------------------------|
|                                                              |                                    |                                                                                                                           | <p>Planta La Laguna, 38320 Tenetife Spain.</p> <p>Chairperson- M<sup>a</sup> del Mar García Sáez.</p>                                                                                                                                                                                                                                                                                                                                                                                              |
| <p>Brunet, Joan. MD, PhD<br/>Colomer, Ramon. (Former PI)</p> | <p>118691/030489</p>               | <p>Hospital Universitario Dr. Josep Trueta,<br/>Servicio de Oncologia, Avda. De Francia s/n,<br/>17007 Girona, Spain.</p> | <p>Comite Etico de Investigacion Clinica,<br/>Hospital Universitario Dr. Josep Trueta<br/>Avenida de Francia s/n planta 9<sup>a</sup> A, 17005<br/>Girona, Spain.</p> <p>Chairperson- Ferrán García-Bragado.</p> <p>Comite Etico de Investigacion Clinica,<br/>Hospital Un iversitario de Bellvitge C/Feixa<br/>Llarga s/n (Frente a Urgencias), Edificio<br/>Fundacio August Pi i Sunyer<br/>08907 Hospitalet de Llobregat (Barcelona),<br/>Spain.</p> <p>Chairperson- Ferrán García-Bragado.</p> |

**CONFIDENTIAL**

| <b>Investigator</b>     | <b>Investigator no./Center no.</b> | <b>Description of Research Facility, Hospital/ Institution, and Address</b>                                                 | <b>Name of IEC/IRB Committee, Address, Committee Chair</b>                                                                                                                                                                                                                                                                                                                                                                                       |
|-------------------------|------------------------------------|-----------------------------------------------------------------------------------------------------------------------------|--------------------------------------------------------------------------------------------------------------------------------------------------------------------------------------------------------------------------------------------------------------------------------------------------------------------------------------------------------------------------------------------------------------------------------------------------|
| Catalan, Gustavo. MD    | 095825/031362                      | Hospital Son Llatzer, Servicio de Oncologia, Carretera de Manacor Km. 4, 07198 Palma de Mallorca, Spain.                    | <p>Comite Etico de Investigacion Clinica de Baleares Conselleria de Salut i Consum, C/ Cecili Metel 18 07003 Palma de Mallorca, Spain.</p> <p>Chairperson- Joan Bargay Lleonat.</p> <p>Comite Etico de Investigacion Clinica, Hospital Universitario de Bellvitge, C/Feixa Llarga s/n (Frente a Urgencias), Edificio Fundacio August Pi i Sunyer, 08907 Hospitalet de Liobregat (Barcelona), Spain.</p> <p>Chairperson- Joan Bargay Lleonat.</p> |
| Cortes, Javier. MD, PhD | 055507/031394                      | Hospital Vall d' Hebron. Pº Vall d' Hebron 119-129, Ed. General planta baja, Servicio de Oncologia, 08035 Barcelona. Spain. | <p>Ethics Committee of Clinical Research, Hospital Vall d'Hebron</p> <p>Direccion de Investigacion, Edificio Institu de Recerca, 2ª planta, Pº Vall d' Hebron 119-</p>                                                                                                                                                                                                                                                                           |



**CONFIDENTIAL**

| <b>Investigator</b>                                                   | <b>Investigator no./Center no.</b> | <b>Description of Research Facility, Hospital/ Institution, and Address</b>                             | <b>Name of IEC/IRB Committee, Address, Committee Chair</b>                                                                                                                                                   |
|-----------------------------------------------------------------------|------------------------------------|---------------------------------------------------------------------------------------------------------|--------------------------------------------------------------------------------------------------------------------------------------------------------------------------------------------------------------|
|                                                                       |                                    |                                                                                                         | <p>129, 08035 Barcelona, Spain.</p> <p>Chairperson- Soledad Gallego Melcón</p>                                                                                                                               |
| Garcia Mata, Jesus. MD*                                               | 093240/030495                      | Hospital Cristal Pinol, Oncology Department. C/Ramon Puga 54, 32005 Orense, Spain.                      | <p>Servicio Gallego de Salud, Comite Ético de Investigacion Clinica, Edificio Administrativo San Lazaro s/n Santiago de Compostela, 15703 A Coruna. Spain.</p> <p>Chairperson- Rosendo Bugarin González.</p> |
| García Saenz, Jose Angel. MD<br>Olmos, Miguel. MD, PhD<br>(Former PI) | 078089/030499                      | Hospital Clinico San Carlos, Oncology Department<br>C/Profesor Martin Lagos s/n<br>28040 Madrid, Spain. | <p>Comite Etica de Investigacion Cllnica Regional de la Comunidad de Madrid C/ Aduana, 29, 28013 Madrid, Spain.</p> <p>Chairperson- Alfonso Moreno González.</p>                                             |
| García Saenz, Jose Angel<br>Gil, Miguel. MD                           | 041286/030478                      | ICO Bellvitge, Avda. Castelldefells Km. 2.7, Hospitalet de Llobregat, 08907 Barcelona, Spain.           | <p>Comite Etico de Investigacion Clinica, Hospital Universitario de Bellvitge C/Feixa Llarga s/n (Frente a Urgencias)<br/>Edificio Fundacio August Pi i Sunyer 08907</p>                                     |

**CONFIDENTIAL**

| Investigator             | Investigator no./Center no. | Description of Research Facility, Hospital/ Institution, and Address                                     | Name of IEC/IRB Committee, Address, Committee Chair                                                                                                                                                   |
|--------------------------|-----------------------------|----------------------------------------------------------------------------------------------------------|-------------------------------------------------------------------------------------------------------------------------------------------------------------------------------------------------------|
|                          |                             |                                                                                                          | <p>Hospitalet de Llobregat Barcelona, Spain.</p> <p>Chairperson- Francesc Esteve Urbano.</p>                                                                                                          |
| Jara, Carlos             | 040284/030541               | Fundacion Hospital de Alcorcan, Servicio de Oncologia, C/Budapest 1, Alcorcan, 28922 Madrid, Spain.      | <p>Comite Etico de Investigacion Clinica de la Fundacion Hospital de Alcorcan C/ Budapest 1, Planta Satano Alcorcan 28922 Madrid, Spain.</p> <p>Chairperson- Patricia Sanmartín Fenollera.</p>        |
| Lianes, Pilar. MD, Ph.D  | 010375/030491               | Hospital de Mataro, Servicio de Oncologia, Carretera de Cirera s/n Mataro, 08034 Barcelona, Spain.       | <p>Comite Etico de Investigacion Clinica del Consorcio Sanitario del Maresme, Carretera de Cirera s/n Planta -2 Unidad de Recerca, 08034, Barcelona, Spain.</p> <p>Chairperson- Mateu Serra Prat.</p> |
| Lluch Hernandez, Ana. MD | 041442/030498               | Hospital Clinico de Valencia, Medical Oncology Department, Avda Blasco Ibanez, 17 46010 Valencia, Spain. | <p>Ethics Committee of Clinical Research, Hospital Clinico de Valencia, Avda Blasco Ibanez, 17 46010 Valencia, Spain.</p>                                                                             |

**CONFIDENTIAL**

| <b>Investigator</b>           | <b>Investigator no./Center no.</b> | <b>Description of Research Facility, Hospital/ Institution, and Address</b>                            | <b>Name of IEC/IRB Committee, Address, Committee Chair</b>                                                                                                                                                                                                                                                                                              |
|-------------------------------|------------------------------------|--------------------------------------------------------------------------------------------------------|---------------------------------------------------------------------------------------------------------------------------------------------------------------------------------------------------------------------------------------------------------------------------------------------------------------------------------------------------------|
|                               |                                    |                                                                                                        | Chairperson- Antonio Peláez Hernández.                                                                                                                                                                                                                                                                                                                  |
| López de Ceballos, Helena. MD | 097914/030493                      | Hospital San Pedro de Alcantara, Avda. Pablo Naranjo s/n, 10003 Caceres, Spain.                        | Clinical Research Ethics Committee, Complejo Hospitalario San Pedro de Alcantara, Avenida Pablo Naranjo s/n, 10003 Caceres, Spain.<br><br>Chairperson- Luis Palomo Cobos.                                                                                                                                                                               |
| Lopez Vega, Manuel. MD, Ph.D  | 095829/031393                      | Hospital Marques de Valdecilla, Servicio da Oncologia, Avda. de Valdecilla s/n 39008 Santander, Spain. | Comite Etico de Investigacion Clinica de Cantabria Fundacion Marques de Valdecilla, Escuela de Enfermeria Planta 5° Avenida de Valdecilla s/n, 39008 Santander, Spain.<br><br>Chairperson- Carlos Redondo Figuero.<br><br>Comite Etico de Investigacion Clinica, Hospital Universitario de Bellvitge, C/Feixa Llarga s/n (Frente a Urgencias), Edificio |

**CONFIDENTIAL**

| <b>Investigator</b>                                       | <b>Investigator no./Center no.</b> | <b>Description of Research Facility, Hospital/ Institution, and Address</b>                                                | <b>Name of IEC/IRB Committee, Address, Committee Chair</b>                                                                                                                                                                    |
|-----------------------------------------------------------|------------------------------------|----------------------------------------------------------------------------------------------------------------------------|-------------------------------------------------------------------------------------------------------------------------------------------------------------------------------------------------------------------------------|
|                                                           |                                    |                                                                                                                            | <p>Fundacio August Pi i Sunyer, 08907 Hospitalet de Llobregat (Barcelona), Spain.</p> <p>Chairperson- Carlos Redondo Figuero.</p>                                                                                             |
| Lopez, Rafael. MD                                         | 093241/031397                      | Hospital Clinico Universitario de Santiago, C/Choupana s/n, Santiago de Compostela, 15706 A Coruna, Spain.                 | <p>Comite Etico de Investigacion Clinica del Servicio Galego de Salud (SERGAS) Edificio Administrative San Lazaro s/n Santiago de Compostela, 15703 A Corufia. Spain.</p> <p>Chairperson- Rosendo Bugarin González.</p>       |
| Morales, Serafin. MD<br>Llombart, Antonio. MD (Former PI) | 010280/031395                      | Hospital Arnau de Vilanova, Oncology Service, Edificio Viejo 3er piso, Avda. Alcalde Rovira Roure 44, 25198 Lleida, Spain. | <p>Clinical Research Ethics Committee, Hospital Amau de Vilanova Hospital Amau de Villanova, Ediflcio Viejo 3er piso, Avda. Alcalde Rovira Roure, 44 25198 Lleida, Spain.</p> <p>Chairperson- Joan Antoni Schoenenberger.</p> |

**CONFIDENTIAL**

| <b>Investigator</b>                                                                                | <b>Investigator no./Center no.</b> | <b>Description of Research Facility, Hospital/ Institution, and Address</b>                                                                           | <b>Name of IEC/IRB Committee, Address, Committee Chair</b>                                                                                                                                                                                                                                             |
|----------------------------------------------------------------------------------------------------|------------------------------------|-------------------------------------------------------------------------------------------------------------------------------------------------------|--------------------------------------------------------------------------------------------------------------------------------------------------------------------------------------------------------------------------------------------------------------------------------------------------------|
| <p>Morales, Serafin</p> <p>Llombart, Antonio (Former PI)</p> <p>Sanchez Rovira, Pedro. MD, PhD</p> | 040280/030480                      | <p>Dr. Pedro Sanchez Rovira, Complejo Hospitalario de Jaen, Servicio de Oncologia, Planta baja, Avda. del Ejercito Espanol 10, 23007 Jaen, Spain.</p> | <p>Comite Etico de Investigacion Clinica Regional Andaluz, Consejeria de Salud, Avenida de la Innovacion s/n, Edificio Arena 1, 41020 Sevilla, Spain.</p> <p>Chairperson- Jesús Foronda Bengoa.</p>                                                                                                    |
| <b>Ukraine</b>                                                                                     |                                    |                                                                                                                                                       |                                                                                                                                                                                                                                                                                                        |
| <p>Banakhevyh, Natalya. MD</p>                                                                     | 101658/034163                      | <p>Kiev City Oncology Hospital 69. Verkhovinna Street., Kyiv 031 15, Ukraine</p>                                                                      | <p>State Pharmacological Centre. Ministry of Health of Ukraine, 40 Ushynskiy Street, Kyiv 03151, Ukraine.</p> <p>Chairperson- Mykhaylo Nesterchuk.</p> <p>Local Ethics Committee, Kiev City Oncology Hospital 69. Verkhovinna Street, Kyiv 031 15, Ukraine.</p> <p>Chairperson- Hordiychuk Prokop.</p> |

**CONFIDENTIAL**

| <b>Investigator</b>               | <b>Investigator no./Center no.</b> | <b>Description of Research Facility, Hospital/ Institution, and Address</b>                                    | <b>Name of IEC/IRB Committee, Address, Committee Chair</b>                                                                                                                                                                                                                                        |
|-----------------------------------|------------------------------------|----------------------------------------------------------------------------------------------------------------|---------------------------------------------------------------------------------------------------------------------------------------------------------------------------------------------------------------------------------------------------------------------------------------------------|
| Bondarenko, Igor. MD, PhD,<br>DSc | 080493/033689                      | City Clinial Hospital # 31, Blizhnaya Street<br>Dnepropetrovsk 49102. Ukraine.                                 | <p>State Expert Centre. Ministry of Health of Ukraine, 40 Ushynskiy Street, Kyiv 03151, Ukraine.</p> <p>Chairperson- Mykhaylo Nesterchuk.</p> <p>Local Ethics Committee, City Clinial Hospital # 431, Blizhnaya Street Dnepropetrovsk 49102, Ukraine.</p> <p>Chairperson- Shynkarenko Mykola.</p> |
| Hotko, Yevhen. MD, PhD            | 101413/034438                      | Transcarpathian Regional Oncology Clinical<br>Dispensary 2. Brodlakovicha Street., Uzhgorod<br>88014, Ukraine. | <p>State Expert Centre. Ministry of Health of Ukraine, 40 Ushynskiy Street, Kyiv 03151, Ukraine.</p> <p>Chairperson- Mykhaylo Nesterchuk.</p> <p>Local Ethics Committee, Uzhgorod Central City Clinical Hospital 20, Gryboiedov Street.,</p>                                                      |

**CONFIDENTIAL**

| <b>Investigator</b>                | <b>Investigator no./Center no.</b> | <b>Description of Research Facility, Hospital/ Institution, and Address</b>                                                       | <b>Name of IEC/IRB Committee, Address, Committee Chair</b>                                                                                                                                                                                                                                                     |
|------------------------------------|------------------------------------|-----------------------------------------------------------------------------------------------------------------------------------|----------------------------------------------------------------------------------------------------------------------------------------------------------------------------------------------------------------------------------------------------------------------------------------------------------------|
|                                    |                                    |                                                                                                                                   | Uzhgorod 88017, Ukraine.<br><br>Chairperson- Volodymyr Shpontak.                                                                                                                                                                                                                                               |
| Shparyk, Yaroslav. MD, PhD         | 002259/033688                      | Lviv State Regional Oncology Medical and Diagnostic Centre, 2A. Hashek Street., Lviv 79031, Ukraine                               | State Expert Centre. Ministry of Health of Ukraine, 40 Ushynskiyi Street., Kyiv 03151, Ukraine.<br><br>Chairperson- Mykhaylo Nesterchuk.<br><br>Local Ethics Committee, Lviv State Regional Oncology Medical and Diagnostic Centre 2A. Hashek Street., Lviv 79031, Ukraine.<br><br>Chairperson- Yuriy Diychuk. |
| <b>United Kingdom</b>              |                                    |                                                                                                                                   |                                                                                                                                                                                                                                                                                                                |
| Agrawal, Rajiv. MB, DNRT, MD, FRCR | 040286/031609                      | The Shrewsbury and Telford Hospital NHS Trust, consisting of The Royal Shrewsbury Hospital, Mytton Oak Road Shrewsbury, SY3 8XQ , | West Glasgow Ethics Committee (1)<br>Administration Building<br>Western Infirmary, Dumbarton Road,<br>Glasgow, Scotland, G11 6NT, United                                                                                                                                                                       |

**CONFIDENTIAL**

| <b>Investigator</b>                                                           | <b>Investigator no./Center no.</b> | <b>Description of Research Facility, Hospital/ Institution, and Address</b>                                        | <b>Name of IEC/IRB Committee, Address, Committee Chair</b>                                                                                                                          |
|-------------------------------------------------------------------------------|------------------------------------|--------------------------------------------------------------------------------------------------------------------|-------------------------------------------------------------------------------------------------------------------------------------------------------------------------------------|
|                                                                               |                                    | United Kingdom.                                                                                                    | Kingdom.<br><br>Chairperson- Dr John Hunter.                                                                                                                                        |
| Anand, Anjana.FRCR, MSc (ONC), MRCP, MBBS<br>Ahmed, Samreen I.MD (Former PI)  | 108879/031029                      | Nottingham University Hospital NHS Trust, City Hospital Campus, Hucknall Road, Nottingham NGS 1PB, United Kingdom. | West Glasgow Ethics Committee (1 )<br>Administration Building<br>Western Infirmary, Dumbarton Road, Glasgow, Scotland, G11 6NT, United Kingdom.<br><br>Chairperson- Dr John Hunter. |
| Armstrong, Anne. BSe (Hons), MB ChB, MRCP, PhD<br>Wardley, Andrew (Former PI) | 095741/035603                      | Christie Hospital NHS Trust, 550 Wilmslow Road, Manchester, M20 4BX, United Kingdom.                               | West Glasgow Ethics Committee (1 )<br>Administration Building<br>Western Infirmary, Dumbarton Road, Glasgow, Scotland, G11 6NT, UK.<br><br>Chairperson- Dr John Hunter.             |
| Bundred, Nigel. MB BS, FRCS, MD                                               | 112882/037473                      | Wythenshawe Hospitel, Nightingale genesis Centre, Southmoor Road. Wythenshawe.                                     | West Glasgow Ethics Committee (1 )<br>Administration Building Western Infirmary,                                                                                                    |



**CONFIDENTIAL**

| <b>Investigator</b>                                                   | <b>Investigator no./Center no.</b> | <b>Description of Research Facility, Hospital/ Institution, and Address</b>                                     | <b>Name of IEC/IRB Committee, Address, Committee Chair</b>                                                                                                                             |
|-----------------------------------------------------------------------|------------------------------------|-----------------------------------------------------------------------------------------------------------------|----------------------------------------------------------------------------------------------------------------------------------------------------------------------------------------|
|                                                                       |                                    | MancMster, M23 9L T. United Kingdom.                                                                            | Dumbarton Road, Glasgow, Scotland, G11 6NT, United Kingdom.<br><br>Chairperson- Dr John Hunter.                                                                                        |
| Bundred, Nigel. MB BS, FRCS, MD<br><br>Canney, Peter. FRCR, MBChB, MD | 102618/33827                       | The Beatson West of Scotland Cancer Centre, Level 0, 1053 Great Western Road, Glasgow, G12 OYN, United Kingdom. | West Glasgow Ethics Committee (1 )<br>Administration Building<br>Western Infirmary,<br>Dumbarton Road, Glasgow, Scotland, G11 6NT, United Kingdom.<br><br>Chairperson- Dr John Hunter  |
| Coleman, Robert. FRCP, MBBS, MRCP, MD                                 | 033602/031605                      | Weston Park Hospital, Whitham Road, Sheffield, S10 2SJ, United Kingdom.                                         | West Glasgow Ethics Committee (1 )<br>Administration Building<br>Western Infirmary,<br>Dumbarton Road, Glasgow, Scotland, G11 6NT, United Kingdom.<br><br>Chairperson- Dr John Hunter. |
| Davidson, Neville. MBBS                                               | 001218/031031                      | Mid Essex Hospitals NHS Trust, Oncology Research, Ground Floor, West Wing Two,                                  | West Glasgow Ethics Committee (1 )<br>Administration Building Western Infirmary,                                                                                                       |

**CONFIDENTIAL**

| <b>Investigator</b>                      | <b>Investigator no./Center no.</b> | <b>Description of Research Facility, Hospital/ Institution, and Address</b>                                                    | <b>Name of IEC/IRB Committee, Address, Committee Chair</b>                                                                                                                             |
|------------------------------------------|------------------------------------|--------------------------------------------------------------------------------------------------------------------------------|----------------------------------------------------------------------------------------------------------------------------------------------------------------------------------------|
|                                          |                                    | Broomfield Hospital, Court Road, Chelmsford, Essex CM1 7ET, United Kingdom.                                                    | Dumbarton Road, Glasgow, Scotland, G11 6NT, United Kingdom.<br><br>Chairperson- Dr John Hunter.                                                                                        |
| Harper-Wynne, Catherine. MD, MRCPI, MBBS | 042257/033286                      | Kent Oncology Centre, Maidstone Hospital, Hermitage Lane, Barming, Maidstone Kent, ME16 9QQ, United Kingdom.                   | West Glasgow Ethics Committee (1 )<br>Administration Building<br>Western Infirmary,<br>Dumbarton Road, Glasgow, Scotland, G11 6NT, United Kingdom.<br><br>Chairperson- Dr John Hunter. |
| Harries, Mark. MA PhD MRCP               | 084653/034199                      | Medical Oncology Bermondsey Wing, Guy's & Saint Thomas' NHS Foundation Trust, Great Maze Pond, London SE1 9RT, United Kingdom. | West Glasgow Ethics Committee (1 )<br>Administration Building<br>Western Infirmary,<br>Dumbarton Road, Glasgow, Scotland, G11 6NT, United Kingdom.<br><br>Chairperson- Dr John Hunter. |
| Hickish, Tamash. MA, MD, FRCP            | 001500/031032                      | Royal Bournemouth Hospital NHS Trust, Castle Lane East, Bournemouth, Dorset, BH7                                               | West Glasgow Ethics Committee (1 )<br>Administration Building<br>Western Infirmary,                                                                                                    |

**CONFIDENTIAL**

| <b>Investigator</b>                    | <b>Investigator no./Center no.</b> | <b>Description of Research Facility, Hospital/ Institution, and Address</b>                          | <b>Name of IEC/IRB Committee, Address, Committee Chair</b>                                                                                                                             |
|----------------------------------------|------------------------------------|------------------------------------------------------------------------------------------------------|----------------------------------------------------------------------------------------------------------------------------------------------------------------------------------------|
|                                        |                                    | 7DWm United Kingdom.                                                                                 | Dumbarton Road, Glasgow, Scotland, G11 6NT, United Kingdom.<br><br>Chairperson- Dr John Hunter.                                                                                        |
| Joffe, Johnathan. MBBS, MD, FRCP, MRCP | 033604/031033                      | Caulderdale and Huddersfield NHS Trust, Acre Street, Lindley, Huddersfield, HD3 3EA, United Kingdom. | West Glasgow Ethics Committee (1 )<br>Administration Building<br>Western Infirmary,<br>Dumbarton Road, Glasgow, Scotland, G11 6NT United Kingdom.<br><br>Chairperson- Dr John Hunter.  |
| Johnston, Stephen. MBBS                | 038785/033576                      | The Royal Marsden NHS Foundation Trust, Downs Road, Sutton, SM2 5PT United Kingdom.                  | West Glasgow Ethics Committee (1 )<br>Administration Building<br>Western Infirmary,<br>Dumbarton Road, Glasgow, Scotland, G11 6NT, United Kingdom.<br><br>Chairperson- Dr John Hunter. |
| Jones, Alison. MB, ChB, MRCP, MD, FRCP | 049326/031618                      | Royal Free Hospital, Pond Street, Hampstead, London, NW3 2QG, United Kingdom.                        | West Glasgow Ethics Committee (1 )<br>Administration Building<br>Western Infirmary,                                                                                                    |

**CONFIDENTIAL**

| <b>Investigator</b>                                | <b>Investigator no./Center no.</b> | <b>Description of Research Facility, Hospital/ Institution, and Address</b>                                 | <b>Name of IEC/IRB Committee, Address, Committee Chair</b>                                                                                                                             |
|----------------------------------------------------|------------------------------------|-------------------------------------------------------------------------------------------------------------|----------------------------------------------------------------------------------------------------------------------------------------------------------------------------------------|
|                                                    |                                    |                                                                                                             | Dumbarton Road, Glasgow, Scotland, G11 6NT, United Kingdom.<br><br>Chairperson- Dr John Hunter.                                                                                        |
| Rea, Daniel. BSc(Hons) MBBS, MRCP, CCST, PhD, FRCP | 033607/035860                      | Cancer Centre, Queen Elizabeth Hospital, Vincent Drive, Edgbaston, Birmingham, B15 2TH, United Kingdom.     | West Glasgow Ethics Committee (1 )<br>Administration Building<br>Western Infirmary,<br>Dumbarton Road, Glasgow, Scotland, G11 6NT, United Kingdom.<br><br>Chairperson- Dr John Hunter. |
| Stein, Rob.                                        | 060032/038853                      | Department of Oncology UCL Hospitals, First Floor Central 250 Euston Road. London, NW1 2PG, United Kingdom. | West Glasgow Ethics Committee (1 )<br>Administration Building<br>Western Infirmary,<br>Dumbarton Road, Glasgow, Scotland, G11 6NT, United Kingdom.<br><br>Chairperson- Dr John Hunter. |
| Verrill, Mark                                      | 049313/031034                      | Clinical Research Facility, Newcastle upon Tyne Hospitals NHS Trust, Royal Victoria                         | West Glasgow Ethics Committee (1 )<br>Administration Building<br>Western Infirmary,                                                                                                    |

**CONFIDENTIAL**

| <b>Investigator</b>  | <b>Investigator no./Center no.</b> | <b>Description of Research Facility, Hospital/ Institution, and Address</b>                              | <b>Name of IEC/IRB Committee, Address, Committee Chair</b>                                                                                                                   |
|----------------------|------------------------------------|----------------------------------------------------------------------------------------------------------|------------------------------------------------------------------------------------------------------------------------------------------------------------------------------|
|                      |                                    | Infirmery, 4th Floor, Leazes Wing, RVI, Newcastle, NE1 4LP, United Kingdom.                              | Dumbarton Road, Glasgow, Scotland, G11 6NT, United Kingdom.<br><br>Chairperson- Dr John Hunter.                                                                              |
| <b>United States</b> |                                    |                                                                                                          |                                                                                                                                                                              |
| Anderson, Thomas. MD | 057691/031411                      | Texas Oncology, 1615 Hospital Parkway, Suite 300 Bedford, Texas 76022, United States.                    | US Oncology, Inc. Institutional Review Board, 10101 Woodloch Forest, The Woodlands, Texas 77380, United States.<br><br>Chairperson- Elizabeth Rogg, M.D.                     |
| Asbury, Robert MD    | 054773/037973                      | Interlakes Oncology & Hematology, 211 White Spruce Boulevard, Rochester, New York, 14623, United States. | Copernicus Group IRB, One Triangle Drive, Suite 100, PO Box 110605, Research Triangle Park, North Caroline, 27703, United States.<br><br>Chairperson- Glenn C. Veit, JD, CIP |
| Baltz, Brad. MD      | 093205/032643                      | Hematology Oncology Services of Arkansas, 9101 Kanis Road. Suite 100, Little Rock,                       | Copernicus Group IRB, One Triangle Drive Suite 100, PO box 110605, Research                                                                                                  |

**CONFIDENTIAL**

| <b>Investigator</b>      | <b>Investigator no./Center no.</b> | <b>Description of Research Facility, Hospital/ Institution, and Address</b>                                          | <b>Name of IEC/IRB Committee, Address, Committee Chair</b>                                                                                                                    |
|--------------------------|------------------------------------|----------------------------------------------------------------------------------------------------------------------|-------------------------------------------------------------------------------------------------------------------------------------------------------------------------------|
|                          |                                    | Arizona 72205, United States.                                                                                        | Triangle Park, North Carolina 27709, United States.<br><br>Chairperson- Glenn C. Veit, JD, CIP.                                                                               |
| Beck, Joseph Thaddeus MD | 090697/036664                      | Highlands Oncology Group, 3232 N. North Hills Boulevard, Fayetteville, Arizona 72703, United States.                 | Copernicus Group IRB, One Triangle Drive, Suite 100 P. O. Box 110605, Research Triangle Park, North Caroline 27709, United States.<br><br>Chairperson- Glenn C. Veit, JD, CIP |
| Blachly, Ronald. MD      | 026926/032530                      | NEA Baptist Clinic, 311 East Matthews, Jonesboro, Arizona 72401, United States.                                      | Copernicus Group IRB, One Triangle Drive, Suite 100PO Box 110605, Research Triangle Park, North Caroline 27703, United States.<br><br>Chairperson- Glenn C. Veit, JD, CIP.    |
| Block, Caroline. MD      | 007218/039043                      | New England Hematology/Oncology Associates, P.C. Vernon Cancer Center, 2014 Washington Street, Newton, Massachusetts | Human Research and Investigation Committee, Newton-Wellesley Hospital Ellison Building 2nd Floor, 2014 Washington                                                             |

**CONFIDENTIAL**

| <b>Investigator</b>  | <b>Investigator no./Center no.</b> | <b>Description of Research Facility, Hospital/ Institution, and Address</b>                                                                     | <b>Name of IEC/IRB Committee, Address, Committee Chair</b>                                                                                               |
|----------------------|------------------------------------|-------------------------------------------------------------------------------------------------------------------------------------------------|----------------------------------------------------------------------------------------------------------------------------------------------------------|
|                      |                                    | 02462, United States.                                                                                                                           | Street, Newton, Massachusetts 02462, United States.<br><br>Chairperson- Fred Millham                                                                     |
| Blum, Joanne. MD     | 058153/032531                      | Texas Oncology-Baylor Charles A. Sammons Cancer Center 3535 Worth Street Dallas, Texas 75246, United States.                                    | US Oncology, Inc. Institutional Review Board, 10101 Woodloch Forest, The Woodlands, Texas 77380, United States.<br><br>Chairperson- Elizabeth Rogg, M.D. |
| Bosserman, Linda. MD | 035834/037631                      | Wilshire Oncology Medical Group, Inc. 1502 Arrow Highway La Verne, California 91750, United States.                                             | Western Institutional Review Board 3535 Seventh Avenue SW Olympia, Washington 98502, United States.<br><br>Chairperson- Theodore D. Schultz.             |
| Bowers, Barbara. MD  | 037811/041971                      | Southdale Cancer Clinic, University of Minnesota, Fairview – Edina, 6363 France Avenue South, Suite 610, Edina, Minnesota 55435, United States. | Research Subjects' Protection Programs, MMC 820, 420 Delaware Street, Minneapolis, Minnesota 55455, United States.                                       |

**CONFIDENTIAL**

| <b>Investigator</b>    | <b>Investigator no./Center no.</b> | <b>Description of Research Facility, Hospital/ Institution, and Address</b>                                          | <b>Name of IEC/IRB Committee, Address, Committee Chair</b>                                                                                                         |
|------------------------|------------------------------------|----------------------------------------------------------------------------------------------------------------------|--------------------------------------------------------------------------------------------------------------------------------------------------------------------|
|                        |                                    |                                                                                                                      | Chairperson- FWA#: 00000312                                                                                                                                        |
| Camacho, Elber. MD     | 073586/031412                      | Comprehensive Cancer Center, 1180 N. Indian Canyon Drive, Suite E218, Palm Springs, California 92262, United States. | Desert Regional Medical Center IRB, 1150 N. Indian Canyon Drive, Palm Springs, California 92262, United States.<br><br>Chairperson- Robert Rosser MD               |
| Carroll, Robert. MD    | 026303/032175                      | Robert R. Carroll, MD, PA<br>6400 W. Newberry Road, Suite 206,<br>Gainesville, Florida 32605, United States.         | Copernicus Group IRB, One Triangle Drive Suite 100, PO box 110605, Research Triangle Park, North Carolina 27709, United States.<br><br>Chairperson- Glenn C. Veit. |
| Cartwright, Thomas. MD | 057773/033091                      | Ocala Oncology Center, 433 S.W. 10th Street, Ocala, Florida 34474, United States.                                    | US Oncology, Inc. Institutional Review Board, 4144 N. Central Expressway, Suite 1250 Dallas, Texas 7520, United States.<br><br>Chairperson- Elizabeth Rogg, M.D.   |



**CONFIDENTIAL**

| <b>Investigator</b> | <b>Investigator no./Center no.</b> | <b>Description of Research Facility, Hospital/ Institution, and Address</b>                                       | <b>Name of IEC/IRB Committee, Address, Committee Chair</b>                                                                                                                    |
|---------------------|------------------------------------|-------------------------------------------------------------------------------------------------------------------|-------------------------------------------------------------------------------------------------------------------------------------------------------------------------------|
| Charu, Veena. MD    | 104393/034491                      | Pacific Cancer Medical Center, Inc. 1801 West Romneya Drive, Suite 203, Anaheim, California 92801, United States. | Copernicus Group IRB, One Triangle Drive, Suite 100, PO Box 110605, Research Triangle Park, North Carolina 27703, United States.<br><br>Chairperson- Glenn C. Veit, JD, CIP   |
| Dakhil, Shaker. MD  | 115846/038901                      | Cancer Center of Kansas, 818 N Emporia, Suite 403, Wichita, Kansas 67214, United States.                          | Copernicus Group IRB, One Triangle Drive, Suite 100, P.O. Box 110605, Research Triangle Park, North Carolina 27709, United States.<br><br>Chairperson- Glenn C. Veit, JD, CIP |
| Dice, Yuhoe. MD     | 058586/032533                      | Cancer Care Centre of South Texas - HOAST, 1448 East Common Street, New Braunfels, Texas 78130, United States.    | US Oncology, Inc. Institutional Review Board, 10101 Woodloch Forest, The Woodlands, Texas 77380, United States.<br><br>Chairperson- Elizabeth Rogg, M.D.                      |

**CONFIDENTIAL**

| <b>Investigator</b>  | <b>Investigator no./Center no.</b> | <b>Description of Research Facility, Hospital/ Institution, and Address</b>                                               | <b>Name of IEC/IRB Committee, Address, Committee Chair</b>                                                                                                                  |
|----------------------|------------------------------------|---------------------------------------------------------------------------------------------------------------------------|-----------------------------------------------------------------------------------------------------------------------------------------------------------------------------|
| Dreisbach, Luke. MD  | 112918/037904                      | Luke P. Dreisbach, MD, 39800 Bob Hope Drive Suite C, Rancho Mirage, California 92270, United States.                      | Copernicus Group IRB, One Triangle Drive Suite 100, PO Box 110605, Research Triangle Park, North Carolina 27703, United States.<br><br>Chairperson- Glenn C. Veit, JD, CIP  |
| Drengler, Ronald. MD | 021362/034089                      | South Texas Oncology and Hematology, P.A.; Research Department; 4383 Medical Dr. San Antonio, Texas 78229, United States. | Copernicus Group IRB, One Triangle Drive, Suite 100, PO Box 110605, Research Triangle Park, North Carolina 27703, United States.<br><br>Chairperson- Glenn C. Veit, JD, CIP |
| Ellison, David. MD   | 101508/033624                      | Charleston Hematology Oncology, PA, 125 Doughty Street Suite 500 Charleston, South Carolina 29403, United States.         | Copernicus Group IRB, One Triangle Drive Suite 100, PO box 110605, Research Triangle Park, North Carolina 27709, United States.<br><br>Chairperson- Glenn C. Veit, JD, CIP  |

**CONFIDENTIAL**

| <b>Investigator</b>                                                                         | <b>Investigator no./Center no.</b> | <b>Description of Research Facility, Hospital/ Institution, and Address</b>                                      | <b>Name of IEC/IRB Committee, Address, Committee Chair</b>                                                                                                                 |
|---------------------------------------------------------------------------------------------|------------------------------------|------------------------------------------------------------------------------------------------------------------|----------------------------------------------------------------------------------------------------------------------------------------------------------------------------|
| Encarnacion, Carlos. MD                                                                     | 094015/033328                      | Texas Oncology – Waco, 1700 West Highway. 6 Waco, Texas 76712, United States.                                    | US Oncology, Inc. Institutional Review Board, 10101 Woodloch Forest, The Woodlands, TX 77380.<br><br>Chairperson- Elizabeth Rogg, M.D.                                     |
| Fain, Jerry. MD<br>Kerr, Robert. MD (Former PI)                                             | 112233/032181                      | Texas Oncology, PA Centres, Central Austin: 901 West 38th Street, Suite 200, Austin, Texas 78705, United States. | Copernicus Group IRB, One Triangle Drive Suite 100, PO box 110605, Research Triangle Park, North Carolina 27709, United States.<br><br>Chairperson- Glenn C. Veit, JD, CIP |
| Flores, Maria Regina. MD<br>Alemany, Carlos MD (Former PI)<br>Danso, Michael MD (Former PI) | 095299/035284                      | Cancer Centers of Florida, 70 West Gore Street, Orlando, Florida 32806, United States.                           | US Oncology, Inc. Institutional Review Board, 10101 Woodloch Forest, The Woodlands, Texas 77380, United States.<br><br>Chairperson- Elizabeth Rogg, M.D.                   |
| Flynn, Patrick J. MD                                                                        | 008751/036714                      | Minnesota Oncology Hematology, P.A. Piper Building, 913 East 26th Street, Suite 405,                             | US Oncology, Inc. Institutional Review Board, 4144 North Central Expressway, Suite                                                                                         |

**CONFIDENTIAL**

| <b>Investigator</b>    | <b>Investigator no./Center no.</b> | <b>Description of Research Facility, Hospital/ Institution, and Address</b>                                      | <b>Name of IEC/IRB Committee, Address, Committee Chair</b>                                                                                          |
|------------------------|------------------------------------|------------------------------------------------------------------------------------------------------------------|-----------------------------------------------------------------------------------------------------------------------------------------------------|
|                        |                                    | Minneapolis, Minnesota 55404, United States.                                                                     | 1250, Dallas, Texas 75204, United States.<br><br>Chairperson- Elizabeth Rogg, M.D.                                                                  |
| Frank, Richard. MD     | 040894/037628                      | Norwalk Hospital, 24 Stevens Street, Norwalk, Connecticut 06856, United States.                                  | Norwalk Hospital IRB, 34 Maple Street Norwalk, Connecticut 06856, United States.<br><br>Chairperson- Pat Toni and Saraswathi Nair.                  |
| Garbo, Lawrence. MD    | 073399/034492                      | New York Oncology Hematology, P.C., 400 Patroon Creek Boulevard, Suite 1, Albany, New York 12206, United States. | US Oncology, Inc. Institutional Review Board, 10101 Woodloch Forest, The Woodlands, Texas 77380, United States.<br><br>Chairperson- Elizabeth Rogg. |
| Goldberg, Jonathan. MD | 108950/036004                      | Mount Kisco Medical Group, 90 South Bedford Street, Mount Kisco New York 10549, United States.                   | Northern Westchester Hospital<br>400 East Main Street, Mount Kisco, New York 10549, United States.<br><br>Chairperson- Craig Brandt.                |
| Graham, Charles. MD    | 101063/033162                      | Charleston Cancer Center, 2910 Tricom                                                                            | Copernicus Group IRB, 118 MacKenan Drive,                                                                                                           |

**CONFIDENTIAL**

| <b>Investigator</b>   | <b>Investigator no./Center no.</b> | <b>Description of Research Facility, Hospital/ Institution, and Address</b>                  | <b>Name of IEC/IRB Committee, Address, Committee Chair</b>                                                                                                                |
|-----------------------|------------------------------------|----------------------------------------------------------------------------------------------|---------------------------------------------------------------------------------------------------------------------------------------------------------------------------|
|                       |                                    | Street, Charleston, South Carolina 29406, United States.                                     | Suite 400, Cary, North Carolina 27511, United States.<br>Chairperson- Glenn C. Veit, JD, CIP.                                                                             |
| Halibey, Bohdan. MD   | 064734/035798                      | Sparta Cancer Center, 89 Sparta Ave. Suite 130<br>Sparta, New Jersey 07871, United States.   | Copernicus Group IRB, One Triangle Drive, Suite 100, P.O. Box 110605, Research Triangle Park, North Carolina 27709, United States.<br><br>Chairperson- Glenn C. Veit, JD. |
| Hallmeyer, Sigrun. MD | 094897/035278                      | Oncology Specialists, S.C., 1700 Luther Lane, Park Ridge, Illinois 60068, United States.     | Western Institutional Review Board, 3535 Seventh Avenue SW, Olympia, Washington 98502, United States.<br><br>Chairperson- Glenn C. Veit, JD, CIP                          |
| Hansen, Vincent. MD   | 033988/031414                      | Northern Utah Associates, 4403 Harrison Blvd., Suite 1685, Ogden, Utah 84403, United States. | Copernicus Group IRB, One Triangle Drive Suite 100, PO box 110605, Research Triangle Park, North Carolina 27709, United States.                                           |

**CONFIDENTIAL**

| <b>Investigator</b>     | <b>Investigator no./Center no.</b> | <b>Description of Research Facility, Hospital/ Institution, and Address</b>                   | <b>Name of IEC/IRB Committee, Address, Committee Chair</b>                                                                                                                     |
|-------------------------|------------------------------------|-----------------------------------------------------------------------------------------------|--------------------------------------------------------------------------------------------------------------------------------------------------------------------------------|
|                         |                                    |                                                                                               | Chairperson- Glenn C. Veit, JD, CIP                                                                                                                                            |
| Hargis, Jeffrey. MD     | 116315/039044                      | Jewish Cancer Care, 2401 Terra Crossing Boulevard, Louisville, Kentucky 40245, United States. | Copernicus Group IRB, One Triangle Drive, Suite 100 PO Box 110605, Research Triangle Park, North Carolina 27709 United States.<br><br>Chairperson- Glenn C. Veit, JD, CIP      |
| Hassany, Syed Fuad. MD. | 107647/035457                      | Syed Fuad Hassany, M.D 1410 McFarland Boulevard. N Tuscaloosa, Alabama 35406, United States.  | Copernicus Group IRB, One Triangle Drive, Suite 100, P.O. Box 11 0605, Research Triangle Park, North Carolina 27709, United States.<br><br>Chairperson- Glenn C. Veit, JD, CIP |
| Hellerstedt, Beth. MD   | 073401/031426                      | Texas Oncology Cancer Center, 6204 Balcones, Austin, Texas, 78731 United States.              | US Oncology, Inc. Institutional Review Board, 10101 Woodloch Forest, The Woodlands, Texas, 77380, United States.<br><br>Chairperson- Elizabeth Rogg, M.D.                      |

**CONFIDENTIAL**

| <b>Investigator</b>     | <b>Investigator no./Center no.</b> | <b>Description of Research Facility, Hospital/ Institution, and Address</b>                                               | <b>Name of IEC/IRB Committee, Address, Committee Chair</b>                                                                                              |
|-------------------------|------------------------------------|---------------------------------------------------------------------------------------------------------------------------|---------------------------------------------------------------------------------------------------------------------------------------------------------|
| Hendricks, Carolyn. MD  | 144278/051750                      | Suburban Hospital Cancer Program, 6420 Rockledge Drive, Suite 3900, Bethesda, Maryland 20817, United States.              | Suburban Hospital IRB, 8600 Old Georgetown Road, Bethesda, Maryland 2081, United States.<br><br>Chairperson- Howard Lederman                            |
| Hermann, Robert. MD     | 017177/034980                      | Northwest Georgia Oncology Centers, PC, 340 Kennestone Hospital Blvd., Suite 200, Marietta, Georgia 30060, United States. | Western Institutional Review Board, 3535 Seventh Avenue SW, Olympia, Washington 98502, United States.<br><br>Chairperson- Theodore D. Schultz.          |
| Herrada, Juan. MD       | 058154/039042                      | Texas Oncology-El Paso, Cancer Treatment Centre Grandview, 1901 Grandview, El Paso, Texas 79902, United States.           | US Oncology, Inc. Institutional Review Board, 10101 Woodloch Forest, The Woodlands, Texas 77380, United State.<br><br>Chairperson- Elizabeth Rogg, M.D. |
| Holmes, Frankie Ann. MD | 076818/033092                      | Frankie Ann Holmes, MD, Texas Oncology-Memorial City, 925 Gessner, Suite 100 Houston, Texas 77024, United States.         | US Oncology, Inc. Institutional Review Board, 10101 Woodloch Forest, The Woodlands, Texas 77380, United States.                                         |

**CONFIDENTIAL**

| <b>Investigator</b>    | <b>Investigator no./Center no.</b> | <b>Description of Research Facility, Hospital/ Institution, and Address</b>                                                              | <b>Name of IEC/IRB Committee, Address, Committee Chair</b>                                                                                                                  |
|------------------------|------------------------------------|------------------------------------------------------------------------------------------------------------------------------------------|-----------------------------------------------------------------------------------------------------------------------------------------------------------------------------|
|                        |                                    |                                                                                                                                          | Chairperson- Elizabeth Rogg, M.D.                                                                                                                                           |
| Iannotti, Nicholas. MD | 027246/031883                      | Hematology/Oncology Associates of the Treasure Coast, 1871 SE Tiffany Avenue, Suite 100, Port Saint Lucie, Florida 34952, United States. | Copernicus Group IRB, One Triangle Drive Suite 100, PO box 110605, Research Triangle Park, North Carolina 27709, United States.<br><br>Chairperson- Glenn C. Veit, JD, CIP. |
| Jones, Michael. MD     | 105684/034978                      | The Jones Clinic, PC; 7710 Wolf River Circle, Germantown, Tennessee 38138, United States.                                                | Copernicus Group IRB, 118 MacKenan Drive, Suite 400, Cary, North Carolina 27511, United States.<br><br>Chairperson- Glenn C. Veit, JD, CIP                                  |
| Jones, Vicky. MD       | 042624/034088                      | Yakima Valley Memorial Hospital/North Star Lodge, 808 North 39th Avenue, Yakima, Washington 98902, United States.                        | US Oncology, Inc. Institutional Review Board, 10101 Woodloch Forest, The Woodlands, Texas 77380, United States.<br><br>Chairperson- Elizabeth Rogg, M.D.                    |
| Kahanic, Stephen. MD   | 031155/036660                      | Siouxland Hem-Onc Assoc. LLP, 230                                                                                                        | Siouxland Institutional Review Board, Health,                                                                                                                               |



**CONFIDENTIAL**

| <b>Investigator</b>   | <b>Investigator no./Center no.</b> | <b>Description of Research Facility, Hospital/ Institution, and Address</b>                                      | <b>Name of IEC/IRB Committee, Address, Committee Chair</b>                                                                                                                  |
|-----------------------|------------------------------------|------------------------------------------------------------------------------------------------------------------|-----------------------------------------------------------------------------------------------------------------------------------------------------------------------------|
|                       |                                    | Nebraska Street, Sioux City, Iowa 51101, United States.                                                          | Inc. 230 Nebraska Street, Sioux City, Iowa 51101, United States.<br><br>Chairperson- David Daniels, M.D.                                                                    |
| Keaton, Mark. MD      | 081959/034489                      | Augusta Oncology Associates, 1348 Walton Way, Suite 4300, Augusta, Georgia 30901, United States.                 | Copernicus Group IRB, One Triangle Drive, Suite 100, PO Box 110605, Research Triangle Park, North Carolina 27709, United States.<br><br>Chairperson- Glenn C. Veit, JD, CIP |
| Kroener, Joan. MD     | 030025/036414                      | Scripps Clinic Torrey Pines, 10666 North Torrey Pines Road, La Jolla California 92037, United States.            | Scripps IRB, 11025 North Torrey Pines Road, Suite 200, La Jolla, California 92037, United States.<br><br>Chairperson- FWA#: 00007338                                        |
| Kuebler, J Philip. MD | 099875/032546                      | Columbus Oncology / Hematology Associates, Inc 810 Jasonway Avenue, Suite A Columbus, Ohio 43214, United States. | Coiumbus CCOP IRB, 1335 Dublin Road, Suite 124-A, Columbus, Ohio 43215, United States.                                                                                      |

**CONFIDENTIAL**

| <b>Investigator</b>    | <b>Investigator no./Center no.</b> | <b>Description of Research Facility, Hospital/ Institution, and Address</b>                            | <b>Name of IEC/IRB Committee, Address, Committee Chair</b>                                                                                                                              |
|------------------------|------------------------------------|--------------------------------------------------------------------------------------------------------|-----------------------------------------------------------------------------------------------------------------------------------------------------------------------------------------|
|                        |                                    |                                                                                                        | Chairperson- Jane Leiby M.D. and Thomas Anderson D.O., FACRO.                                                                                                                           |
| Letzer, Jeffrey.DO     | 101519/033499                      | Kalamazoo Hematology and Oncology, 1634 Gull Road, Suite 103 Kalamazoo, Michigan 49048, United States. | US Oncology, Inc. Institutional Review Board, 10101 Woodloch Forest, The Woodlands, Texas 77380, United States.<br><br>Chairperson- Elizabeth Rogg, M.D.                                |
| Lindquist, Deborah. MD | 057928/031427                      | Arizona Oncology Associates, PC-NAHOA, 3700 W State Route 89A, Sedona, Arizona, 86336 United States.   | US Oncology, Inc. Institutional Review Board, 10101 Woodloch Forest, The Woodlands, Texas 77380, United States.<br><br>Chairperson- Elizabeth Rogg, M.D.                                |
| Liu, Minetta. MD       | 057371/032176                      | Georgetown University Hospital, 3800 Reservoir Road, North West, Washington DC 20007, United States.   | MedStar Research Institute-Georgetown University Oncology Institutional Review Board, Medical Dental Building, SW 104 3900 Reservoir Road, NW Washington, DC 20057-2197, United States. |

**CONFIDENTIAL**

| <b>Investigator</b>                                    | <b>Investigator no./Center no.</b> | <b>Description of Research Facility, Hospital/ Institution, and Address</b>                                             | <b>Name of IEC/IRB Committee, Address, Committee Chair</b>                                                                                                           |
|--------------------------------------------------------|------------------------------------|-------------------------------------------------------------------------------------------------------------------------|----------------------------------------------------------------------------------------------------------------------------------------------------------------------|
|                                                        |                                    |                                                                                                                         | Chairperson- Jimmy Hwang.                                                                                                                                            |
| Lowenthal, Ivan. MD<br>Overmoyer, Beth. MD (Former PI) | 012092/032174                      | Connecticut Oncology & Hematology, LLP,<br>200 Kennedy Drive, Torrington, Connecticut<br>06790, United States.          | Connecticut Oncology & Hematology, LLP,<br>200 Kennedy Drive, Torrington, Connecticut<br>06790, United States.<br><br>Chairperson- Elizabeth Rogg, M.D.              |
| MacLaughlin, William. MD                               | 106988/035279                      | Cancer Specialists of Tidewater, Ltd., 1 10<br>Wimbledon Square, Suite E, Chesapeake,<br>Virginia 23320, United States. | Western Institutional Review Board, 3535<br>Seventh Avenue SW, Olympia, Washington<br>98502, United States.<br><br>Chairperson- Theodore D. Schultz.                 |
| Malamud, Stephen. MD                                   | 100118/032645                      | Beth Israel Medical Center, 10 Union Square<br>East, New York, New York 10003, United<br>States.                        | Institutional Review Board, Beth Israel<br>Medical Center, 160 Water Street, 24th Floor,<br>New York, 10038, United States.<br><br>Chairperson- Arnold Winston, M.D. |
| McGrath, James. MD                                     | 101800/033501                      | Gaston Hematology & Oncology, 261 0<br>Aberdeen Boulevard, Gastonia North Carolina                                      | Copernicus Group IRB, One Triangle Drive,<br>Suite 100, P.O. Box 110605, Research                                                                                    |

**CONFIDENTIAL**

| <b>Investigator</b>                                                                        | <b>Investigator no./Center no.</b> | <b>Description of Research Facility, Hospital/ Institution, and Address</b>                                   | <b>Name of IEC/IRB Committee, Address, Committee Chair</b>                                                                                                                  |
|--------------------------------------------------------------------------------------------|------------------------------------|---------------------------------------------------------------------------------------------------------------|-----------------------------------------------------------------------------------------------------------------------------------------------------------------------------|
|                                                                                            |                                    | 28054, United States.                                                                                         | Triangle Park, North Carolina 27709, United States.<br><br>Chairperson- Glenn C. Veit, JD, CIP.                                                                             |
| McIntyre, Kristi. MD                                                                       | 058169/033729                      | Texas Oncology, 8220 Walnut Hill Lane Professional Bldg. 11, Suite 700 Dallas, Texas 7523 1, United States.   | US Oncology, Inc. Institutional Review Board, 101 01 Woodloch Forest - The Woodlands, Texas 77380, United States.<br><br>Chairperson- Elizabeth Rogg, M.D.                  |
| Mehrotra, Avanti MD<br>Larson, Timothy. MD (Former PI)<br>Nagargoje, Gauri. MD (Former PI) | 219136/037630                      | Hubert H. Humphrey Cancer Center 3435 West Broadway, Suite 1135, Robbinsdale, Minnesota 55422, United States. | North Memorial Health Care, Institutional Review Board, 3300 Oakdale Avenue, North, Robbinsdale, Minnesota 55422, United States.<br><br>Chairperson- Gary D. Hanovich, M.D. |
| Middleman, Edward. MD, MPH                                                                 | 064371/035281                      | Dallas Oncology Consultants, PA, 310 E.                                                                       | Copernicus Group IRB, One Triangle Drive,                                                                                                                                   |

**CONFIDENTIAL**

| <b>Investigator</b>      | <b>Investigator no./Center no.</b> | <b>Description of Research Facility, Hospital/ Institution, and Address</b>                                             | <b>Name of IEC/IRB Committee, Address, Committee Chair</b>                                                                                                                                      |
|--------------------------|------------------------------------|-------------------------------------------------------------------------------------------------------------------------|-------------------------------------------------------------------------------------------------------------------------------------------------------------------------------------------------|
|                          |                                    | Highway 67, Duncanville, Texas 751 37, United States.                                                                   | Suite 100, P.O. Box 110605, Research Triangle Park, North Carolina 27709, United States.<br><br>Chairperson- Glenn C. Veit, JD, CIP.                                                            |
| Modiano, Manuel. MD      | 027237/038773                      | ACRC/Arizona Clinical Research Center, Inc. 1825 North Kolb Road, Tucson, Arizona 85715, United State.                  | Biomedical Research Institute of America, 2525 Camino del Rio South, Suite 300, San Diego, California 92108, United States.<br><br>Chairperson- Holly Hunter Stull.                             |
| Morrow, Phuong Khanh. MD | 189531/031881                      | The University of Texas, M.D. Anderson Cancer Center, 1515 Holcombe Boulevard Houston, Texas 77030-4009, United States. | The University of Texas M.D. Anderson Cancer Center, Institutional Review Board - Unit 198 1515 Holcom be Boulevard Houston, Texas 77030-4009, United States.<br><br>Chairperson- Susan O'Brian |
| Moy, Beverly. MD, MPH    | 043676/040255                      | Massachusetts General Hospital, Yawkey 8 Pharmacy, 32 Fruit Street Boston,                                              | Institutional Review Board cia Office for Protection of Research Subjects                                                                                                                       |

**CONFIDENTIAL**

| <b>Investigator</b>   | <b>Investigator no./Center no.</b> | <b>Description of Research Facility, Hospital/ Institution, and Address</b>       | <b>Name of IEC/IRB Committee, Address, Committee Chair</b>                                                                                                                                             |
|-----------------------|------------------------------------|-----------------------------------------------------------------------------------|--------------------------------------------------------------------------------------------------------------------------------------------------------------------------------------------------------|
|                       |                                    | Massachusetts 02114, United States.                                               | (OPRS) 450 Brookline Avenue Boston, Massachusetts 02215, United States.<br><br>Chairperson- Stephen Sallan, MD and Richard Penson, MD                                                                  |
| Moy, Beverly. MD, MPH | 043676/040195                      | Massachusetts General Hospital, 55 Fruit Street, Boston, MA 02114, United States. | Institutional Review Board c/o, Office for Protection of Research Subjects (OPRS) 450 Brookline Avenue, Boston, MA 02215, United States.<br><br>Chairperson- Stephen Sallan, MD and Richard Penson, MD |
| Moy, Beverly. MD, MPH | 043676/033500                      | Massachusetts General Hospital, 32 Fruit Street, Boston, MA 02114, United States. | Institutional Review Board c/o, Office for Protection of Research Subjects (OPRS) 450 Brookline Avenue, Boston, MA 02215, United States.<br><br>Chairperson- Stephen Sallan, MD and                    |

**CONFIDENTIAL**

| <b>Investigator</b>        | <b>Investigator no./Center no.</b> | <b>Description of Research Facility, Hospital/ Institution, and Address</b>                                    | <b>Name of IEC/IRB Committee, Address, Committee Chair</b>                                                                                                                                  |
|----------------------------|------------------------------------|----------------------------------------------------------------------------------------------------------------|---------------------------------------------------------------------------------------------------------------------------------------------------------------------------------------------|
|                            |                                    |                                                                                                                | Richard Penson, MD                                                                                                                                                                          |
| Nikcevich, Daniel. MD, PhD | 052325/032029                      | Duluth Clinic, 420 East 1st Street<br>Duluth, Minnesota 55805, United States.                                  | Saint Mary's Duluth Clinic Health System,<br>Institutional Review Board, 400 East Third<br>Street, Duluth, Minnesota 55805, United<br>States.<br><br>Chairperson- Charles Gessert, MD, MPH. |
| Oratz, Ruth. MD, FACP      | 093328/037632                      | Ruth Oratz MD, 345 East 37th Street, Suite<br>202, New York 10016, United States.                              | US Oncology, Inc. Institutional Review Board,<br>101 01 Woodloch Forest - The Woodlands,<br>Texas 77380, United States.<br><br>Chairperson- Elizabeth Rogg, M.D.                            |
| Orlowski, Richard. MD      | 019980/032183                      | Carolina Oncology Specialist P.A, 2406<br>Century Place S.E., Hickory, North Carolina,<br>28602 United States. | US Oncology, Inc. Institutional Review Board,<br>10101 Woodloch Forest<br>The Woodlands, Texas 77380, United<br>States.<br><br>Chairperson- Elizabeth Rogg, M.D.                            |

**CONFIDENTIAL**

| <b>Investigator</b>     | <b>Investigator no./Center no.</b> | <b>Description of Research Facility, Hospital/ Institution, and Address</b>                                                                      | <b>Name of IEC/IRB Committee, Address, Committee Chair</b>                                                                                                                   |
|-------------------------|------------------------------------|--------------------------------------------------------------------------------------------------------------------------------------------------|------------------------------------------------------------------------------------------------------------------------------------------------------------------------------|
| Page, Ray. DO, PhD      | 011212/031884                      | The Center for Cancer and Blood Disorders, 800 West Magnolia, Fort Worth, Texas 76104, United States.                                            | Copernicus Group IRB, One Triangle Drive, Suite 100, Research Triangle Park, North Carolina 27709, United States.<br><br>Chairperson- Glenn C. Veit, JD, CIP.                |
| Papish, Steven. MD      | 018053/031880                      | Hematology-Oncology Associates of Northern NJ, PA Carol G. Simon Cancer Center, 100 Madison Avenue, Morristown, New Jersey 07962, United States. | US Oncology, Inc. Institutional Review Board, 101 01 Woodloch Forest, The Woodlands, Texas 77380, United States.<br><br>Chairperson- Elizabeth Rogg, M.D.                    |
| Patel, Ravi. MD         | 007639/034090                      | Comprehensive Blood and Cancer Center, 6501 Truxtun Avenue, Bakersfield, California 93309, United States.                                        | Copernicus Group IRB, One Triangle Drive, Suite 100, PO Box 1 10605, Research Triangle Park, North Carolina 27703, United States.<br><br>Chairperson: Glenn C. Veit, JD, CIP |
| Paul, Devchand. DO, PhD | 080295/045509                      | Rocky Mountain Cancer Centers, Suite 400, 4700 East Hale Parkway, Denver,                                                                        | US Oncology. Inc. Institutional Review Board,                                                                                                                                |



**CONFIDENTIAL**

| <b>Investigator</b>                                      | <b>Investigator no./Center no.</b> | <b>Description of Research Facility, Hospital/ Institution, and Address</b>                                   | <b>Name of IEC/IRB Committee, Address, Committee Chair</b>                                                                                                      |
|----------------------------------------------------------|------------------------------------|---------------------------------------------------------------------------------------------------------------|-----------------------------------------------------------------------------------------------------------------------------------------------------------------|
|                                                          |                                    | Colorado 80220, United States.                                                                                | 10101 Woodloch Forest Drive,<br>The Woodlands, Texas 77380, United States.<br><br>Chairperson- Elizabeth Rogg, M.D.                                             |
| Prow, Debra. MD<br>Merchant, Joseph. MD (Former PI)      | 130236/038869                      | McFarland Clinic, P.C 1215 Duff Avenue<br>Ames, Iowa 5001 0-3014, United States.                              | Mary Greeley Medical Center IRB<br>11 11 Duff Avenue Ames, Iowa 5001 0,<br>United States.<br><br>Chairperson- Dario Zaffarano, J.D.                             |
| Rakowski, Thomas. MD<br>Chinitz, Allen. MD (Former PI)   | 121042/035378                      | The Valley Hospital, Luckow Pavilion, One<br>Valley Health Plaza<br>Paramus, New Jersey 07652, United States. | The Valley Hospital Institutional Review<br>Board 223 N. Van Dien Avenue Ridgewood,<br>New Jersey 07450 United States.<br><br>Chairperson- David Montgomery, MD |
| Reznikoff, Glen. MD<br>Dressler, Kenneth. MD (Former PI) | 102760/031878                      | Medical Specialists of Fairfield<br>425 Post Road Fairfield, Connecticut 06824,<br>United States.             | Copernicus Group IRB, One Triangle Drive<br>Suite 100, PO box 110605, Research<br>Triangle Park, North Carolina 27709, United<br>States.                        |

**CONFIDENTIAL**

| <b>Investigator</b>                       | <b>Investigator no./Center no.</b> | <b>Description of Research Facility, Hospital/ Institution, and Address</b>                                          | <b>Name of IEC/IRB Committee, Address, Committee Chair</b>                                                                                          |
|-------------------------------------------|------------------------------------|----------------------------------------------------------------------------------------------------------------------|-----------------------------------------------------------------------------------------------------------------------------------------------------|
|                                           |                                    |                                                                                                                      | Chairperson- Glenn C. Veit, JD, CIP                                                                                                                 |
| Richards, Donald. MD, PhD                 | 058188/032177                      | Tyler Cancer Center 9 10 E. Houston Street, Suite, 100 Tyler, Texas 75702                                            | US Oncology, Inc. Institutional Review Board,<br>10101 Woodloch Forest<br>The Woodlands, TX 77380.<br><br>Chairperson- Elizabeth Rogg, M.D.         |
| Richards, Donald<br><br>Rigden, Jamie. MD | 112920/037905                      | Heartand Hematology-Oncology Associates Inc. 2000 NE Vivion Road 1st Fl. Kansas City, Missouri 64118, United States. | Copernicus Group IRB<br>118 MacKenan Drive Suite 400<br>Cary, North Carolina 27511, United States<br><br>Chairperson- Glenn C. Veit, JD, CIP        |
| Rinn, Kristine. MD                        | 027240/032182                      | Swedish Cancer Institute<br>122 1 Madison Street Seattle, Washington 98104, United States.                           | Western Institutional Review Board 3535<br>Seventh Avenue, SW<br>Olympia, Washington 98502, United States.<br><br>Chairperson- Theodore D. Schultz. |
| Robert, Nicholas. MD                      | 061344/031428                      | Virginia Cancer Specialist PC, 8503 Arlington                                                                        | US Oncology, Inc. Institutional Review Board,                                                                                                       |

**CONFIDENTIAL**

| <b>Investigator</b>  | <b>Investigator no./Center no.</b> | <b>Description of Research Facility, Hospital/ Institution, and Address</b>                                                      | <b>Name of IEC/IRB Committee, Address, Committee Chair</b>                                                                                                                     |
|----------------------|------------------------------------|----------------------------------------------------------------------------------------------------------------------------------|--------------------------------------------------------------------------------------------------------------------------------------------------------------------------------|
|                      |                                    | Blvd. Suite 400, Fairfax, Virginia 22031, United States.                                                                         | 10101 Woodloch Forest, The Woodlands, Texas 77380, United States. Chairperson- Elizabeth Rogg, M.D.                                                                            |
| Roberts, Michael. MD | 078410/032178                      | Hematology Oncology Associates, 3330 North 2nd Street, Suite 400, Phoenix, AZ 85012                                              | US Oncology, Inc. Institutional Review Board, 4144 N. Central Expressway, Suite 1250, Dallas, TX 75204.<br><br>Chairperson- Elizabeth Rogg, M.D.                               |
| Rovito, Marc. MD     | 098747/032184                      | Consultants in Medical Oncology and Hematology, 2100 Keystone Avenue, Suite 502, Drexel Hill, Pennsylvania 19026, United States. | Copernicus Group IRB, One Triangle Drive Suite 100, PO Box 1 10605<br>Research Triangle Park, North Carolina 27703, United States.<br><br>Chairperson- Glenn C. Veit, JD, CIP. |
| Rubin, Peter. MD     | 040392/032644                      | Moses H. Cone Regional Cancer Center 501 North Elam Avenue<br>Greensboro, North Carolina 27403, United                           | Copernicus Group IRB<br>One Triangle Drive Suite 100<br>PO Box 1 10605, Research Triangle Park,                                                                                |

**CONFIDENTIAL**

| <b>Investigator</b>     | <b>Investigator no./Center no.</b> | <b>Description of Research Facility, Hospital/ Institution, and Address</b>                                             | <b>Name of IEC/IRB Committee, Address, Committee Chair</b>                                                                                                                         |
|-------------------------|------------------------------------|-------------------------------------------------------------------------------------------------------------------------|------------------------------------------------------------------------------------------------------------------------------------------------------------------------------------|
|                         |                                    | States.                                                                                                                 | North Carolina 27703, United States.<br><br>Chairperson- Glenn C. Veit, JD, CIP                                                                                                    |
| Rubin, Rene. MD         | 097448/031882                      | Rittenhouse Hematology/Oncology PC, 207 N. Broad Street 6th floor, Philadelphia, Pennsylvania 191 07, United States.    | Copernicus Group IRB<br>One Triangle Drive, Suite 100 PO Box 11 0605, USA, Research Triangle Park, North Carolina 27703, United States.<br><br>Chairperson- Glenn C. Veit, JD, CIP |
| Samuel, Edward. MD, PhD | 029933/036417                      | North Shore Hematology/Oncology Associates<br>235 N. Belle Mead Road.<br>East Setauket, New York 1 1733, United States. | Copernicus Group IRB<br>One Triangle Drive, Suite 100<br>PO Box 11 0605, Research Triangle Park, North Carolina 27703, United States.<br><br>Chairperson- Glenn C. Veit, JD, CIP   |
| Sanchez, Ines. MD       | 114392/038302                      | Texas Oncology- El Paso Cancer Treatment Center, 1901 Grandview Avenue, El Paso, Texas 79902, United States.            | Copernicus Group IRB, One Triangle Drive, Suite 100,<br>PO Box 11 0605, Research Triangle Park,                                                                                    |

**CONFIDENTIAL**

| <b>Investigator</b>        | <b>Investigator no./Center no.</b> | <b>Description of Research Facility, Hospital/ Institution, and Address</b>                              | <b>Name of IEC/IRB Committee, Address, Committee Chair</b>                                                                                                                             |
|----------------------------|------------------------------------|----------------------------------------------------------------------------------------------------------|----------------------------------------------------------------------------------------------------------------------------------------------------------------------------------------|
|                            |                                    |                                                                                                          | <p>North Carolina 27703, United States.</p> <p>Chairperson- Glenn C. Veit, JD, CIP</p>                                                                                                 |
| Savin, Michael. MD         | 058196/033627                      | Texas Cancer Center at Medical City 7777 Forest Lane Bldg. D400 Dallas, Texas 75230-2510, United States. | <p>US Oncology, Inc Institutional Review Board, 4 144 N Central Expressway, Suite 1250, Dallas, Texas 75204, United States.</p> <p>Chairperson- Elizabeth Rogg, M.D.</p>               |
| Schlabach, Larry. MD       | 112767/037903                      | Erlanger Health System, 975 East Third Street, Chattanooga, Tennessee 37403, United States.              | <p>University of Tennessee College of Medicine Erlanger IRB<br/>Suite 102 960 East Third Street Chattanooga, Tennessee 37403 United States.</p> <p>Chairperson- Manoo Bhakta, M.D.</p> |
| Schlossman, David. MD, PhD | 058201/032179                      | Missouri Cancer Associates, 1705 E Broadway, Suite 100, Columbia, Missouri 65201, United States.         | <p>US Oncology, Inc. Institutional Review Board, 4144 North Central Expressway, Suite 1250, Dallas, Texas 75204, United States.</p>                                                    |

**CONFIDENTIAL**

| <b>Investigator</b>         | <b>Investigator no./Center no.</b> | <b>Description of Research Facility, Hospital/ Institution, and Address</b>                                           | <b>Name of IEC/IRB Committee, Address, Committee Chair</b>                                                                                                                          |
|-----------------------------|------------------------------------|-----------------------------------------------------------------------------------------------------------------------|-------------------------------------------------------------------------------------------------------------------------------------------------------------------------------------|
|                             |                                    |                                                                                                                       | Chairperson- Elizabeth Rogg, M.D.                                                                                                                                                   |
| Schwartzberg, Lee. MD, FACP | 014204/035375                      | The West Clinic, 100 N. Humphreys Blvd.,<br>Memphis, Tennessee 381 20, United States.                                 | Western Institutional Review Board 3535<br>Seventh Avenue SW, Olympia, Washington<br>98502, United States.<br><br>Chairperson- Theodore D. Schultz.                                 |
| Seiler Jr, Milton. MD       | 064375/034979                      | Hematology and Oncology Specialists, LLC,<br>4228 Houma Blvd. Suite 130, Metairie,<br>Louisiana 70006, United States. | Copernicus Group IRB<br>One Triangle Drive, Suite 100<br>PO Box 1 10605, Research Triangle Park,<br>North Carolina 27703, United States.<br><br>Chairperson- Glenn C. Veit, JD, CIP |
| Shimkus, Brian. MD          | 105685/034977                      | Austin Cancer Centers<br>11111 Research Baoulevard. Ste.450 Austin,<br>Texas 78759, United States.                    | Copernicus Group IRB<br>One Triangle Drive Ste. 100<br>PO Box 110605, Research Triangle Park,<br>North Carolina 27709 United States.<br><br>Chairperson- Glenn C. Veit, JD, CIP.    |

**CONFIDENTIAL**

| <b>Investigator</b>                                     | <b>Investigator no./Center no.</b> | <b>Description of Research Facility, Hospital/ Institution, and Address</b>                                              | <b>Name of IEC/IRB Committee, Address, Committee Chair</b>                                                                                                                             |
|---------------------------------------------------------|------------------------------------|--------------------------------------------------------------------------------------------------------------------------|----------------------------------------------------------------------------------------------------------------------------------------------------------------------------------------|
| Silverman, Paula. MD                                    | 067686/036418                      | University Hospitals Case Medical Center<br>1100 Euclid Avenue,<br>Cleveland, Ohio 441 06, United States.                | Case Cancer IR8, 10900 Euclid Avenue<br>Cleveland, Ohio 44106, United States.<br><br>Chairperson- Rachel Egler, M.D.                                                                   |
| Sivarajan, Kulumani. MD<br>Modi, Sanjiv. MD (Former PI) | 073734/033327                      | Joliet Oncology-Hematology Associates,<br>Ltd.(Main) 2614 W. Jefferson Street, Joliet,<br>Illinois 60435, United States. | Copernicus Group IRB, One Triangle Drive,<br>Suite 100, P.O. Box 110605, Research<br>Triangle Park, North Carolina 27709, United<br>States.<br><br>Chairperson- Glenn C. Veit, JD, CIP |
| Sleckman, Bethany. MD<br>Borson, Rachel. MD (Former PI) | 026670/032180                      | Saint Louis Cancer & Breast Institute, 6435<br>Chippewa Saint, Saint Louis, Missouri 63109,<br>United States.            | Saint John's Mercy Medical Center<br>Institutional Review Board, 615 S. New Ballas<br>Road, 81. Louis, Missouri 63141C, United<br>States.<br><br>Chairperson- Donald York, Ph.D        |
| Smith, David MD                                         | 058202/031415                      | Northwest Cancer Specialists, P.C. 210 SE<br>136 <sup>th</sup> Avenue. Vancouver, Washington 98684,                      | US Oncology, Inc. Institutional Review Board,<br>101 01 Woodloch Forest, The Woodlands,                                                                                                |

**CONFIDENTIAL**

| <b>Investigator</b>                                                                              | <b>Investigator no./Center no.</b> | <b>Description of Research Facility, Hospital/ Institution, and Address</b>                                          | <b>Name of IEC/IRB Committee, Address, Committee Chair</b>                                                                                                                                                   |
|--------------------------------------------------------------------------------------------------|------------------------------------|----------------------------------------------------------------------------------------------------------------------|--------------------------------------------------------------------------------------------------------------------------------------------------------------------------------------------------------------|
|                                                                                                  |                                    | United States.                                                                                                       | Texas 77380, United States.<br><br>Chairperson- Elizabeth Rogg.                                                                                                                                              |
| Smith, Karen. MD, MPH<br>Verma, Nitin. MD (Former PI)<br>Aggrawal, Anita. DO, PhD<br>(Former PI) | 105945/035424                      | Washington Cancer Institute at Washington Hospital Center, 110 Irving Street. NW.<br>Washington 20010, United States | MedStar Research Institute-Georgetown University Oncology, Institutional Review Board, 3900 Reservoir Road, N.W.<br>Med-Dent SW 104, Washington, 20057 United States.<br><br>Chairperson- David J. Perry, MD |
| Swan Jr, Forrest. MD                                                                             | 026587/031431                      | Cancer Outreach Associates, PC, 104 Abingdon Place, Abingdon, Virginia 24211, United States.                         | Copernicus Group IRB, One Triangle Drive, Suite 100<br>PO Box 1 10605, Research Triangle Park, North Carolina 27703, United States.<br><br>Chairperson- Glenn C. Veit, JD, CIP                               |
| Thomas-Joshua, Gracy. MD<br>Weiner, Robert (Former PI)                                           | 120507/038772                      | Medical Specialists of the Palm Beaches, Inc. 10301 Hagen Ranch Road, Suite B4                                       | Copernicus Group IRB, One Triangle Drive, Suite 100, PO Box 1 10605, Research                                                                                                                                |



**CONFIDENTIAL**

| <b>Investigator</b>         | <b>Investigator no./Center no.</b> | <b>Description of Research Facility, Hospital/ Institution, and Address</b>                                | <b>Name of IEC/IRB Committee, Address, Committee Chair</b>                                                                                                                            |
|-----------------------------|------------------------------------|------------------------------------------------------------------------------------------------------------|---------------------------------------------------------------------------------------------------------------------------------------------------------------------------------------|
|                             |                                    | Boynton Beach, Florida 33437, United States.                                                               | Triangle Park, North Carolina 27703, United States.<br><br>Chairperson- Glenn C. Veit, JD, CIP                                                                                        |
| Van Haelst, Carol. MD       | 114380/038291                      | Cascade Cancer Center<br>12303 NE 130th Lane, Suite 120<br>Kirkland, Washington 98034, United States.      | Copernicus Group IRB, One Triangle Drive,<br>Suite 100, PO Box 1 10605, Research<br>Triangle Park, North Carolina 27703, United<br>States.<br><br>Chairperson- Glenn C. Veit, JD, CIP |
| Vogel, Charles. MD          | 014693/034582                      | Boca Raton Comprehensive Cancer Center,<br>21020 State Road 7 Boca Raton, Florida<br>33428, United States. | Chesapeake Research Review, Inc. 7063<br>Columbia Gateway Drive, Suite 110,<br>Columbia, Maryland - 21046-3403, United<br>States.<br><br>Chairperson- Anita Tarzian Ph. D             |
| Vrindavanam, Nandagopal. MD | 076598/033625                      | Signal Point Hematology/Oncology, Inc.<br>235 N. Breiel Boulevard, Middletown, Ohio                        | Copernicus Group IRB, One Triangle Drive<br>Suite 100, PO Box 1 10605, Research                                                                                                       |

**CONFIDENTIAL**

| <b>Investigator</b>                     | <b>Investigator no./Center no.</b> | <b>Description of Research Facility, Hospital/ Institution, and Address</b>                                    | <b>Name of IEC/IRB Committee, Address, Committee Chair</b>                                                                                                         |
|-----------------------------------------|------------------------------------|----------------------------------------------------------------------------------------------------------------|--------------------------------------------------------------------------------------------------------------------------------------------------------------------|
|                                         |                                    | 45042, United States.                                                                                          | Triangle Park, North Carolina 27703, United States.<br><br>Chairperson- Glenn C. Veit, JD, CIP                                                                     |
| Weckstein, Douglas. MD                  | 015518/033623                      | NH Oncology-Hematology, PA, 200 Technology Drive, Hooksett, New Hampshire 031 06, United States.               | US Oncology, Inc. Institutional Review Board, 101 01 Woodloch Forest, The Woodlands, Texas 77380, United States.<br><br>Chairperson- Elizabeth Rogg, M.D.          |
| Weigand, Robert. MD                     | 017016/032535                      | Saint Joseph Oncology, Inc., 902 North Riverside Road, Suite 200, Saint Joseph, Missouri 64507, United States. | US Oncology, Inc. Institutional Review Board, 4144 N. Central Expressway, Suite 1250, Dallas, Texas 75204, United States.<br><br>Chairperson- Elizabeth Rogg, M.D. |
| Weigand, Robert<br>Weisberg, Tracey. MD | 030049/031417                      | MCCM, 100 Campus Drive, Unit 108, Scarborough, Maine 04074, United States.                                     | Copernicus Group IRB, One Triangle Drive Suite 100, P.O. Box 11 0605<br><br>Research Triangle Park, North Carolina 27709, United States.                           |

**CONFIDENTIAL**

| <b>Investigator</b>                                | <b>Investigator no./Center no.</b> | <b>Description of Research Facility, Hospital/ Institution, and Address</b>                                                                           | <b>Name of IEC/IRB Committee, Address, Committee Chair</b>                                                                                                                 |
|----------------------------------------------------|------------------------------------|-------------------------------------------------------------------------------------------------------------------------------------------------------|----------------------------------------------------------------------------------------------------------------------------------------------------------------------------|
|                                                    |                                    |                                                                                                                                                       | Chairperson- Glenn C. Veit, JD, CIP                                                                                                                                        |
| White Jr, Leonard. MD<br>Eckardt, John (Former PI) | 037728/032532                      | Arch Medical Services, Inc. DBA The Center For Cancer Care and Research, 12855 North Forty Drive, Suite 200, St Louis, Missouri 63141, United States. | US Oncology, Inc. Institutional Review Board,<br>101 01 Woodloch Forest<br>The Woodlands, Texas 77380, United States.<br><br>Chairperson- Elizabeth Rogg, M.D.             |
| Williams, Stephanie. MD                            | 057038/035283                      | Hematology Oncology Associates of Illinois, 676 N. Saint Clair, Suite 2140, Chicago, Illinois 6061 1, United States.                                  | US Oncology, Inc. Institutional Review Board,<br>4144 North Central Expressway, Suite 1250<br>Dallas, Texas 75204, United States.<br><br>Chairperson- Elizabeth Rogg, M.D. |
| Wright, Gail. MD                                   | 073605/031432                      | Florida Cancer Institute - New Hope 7651 Medical Drive, Hudson, Florida 34667, United States.                                                         | US Oncology, Inc. Institutional Review Board,<br>10101 Woodloch Forest<br>The Woodlands, Texas 77380, United States.<br><br>Chairperson - Elizabeth Rogg, M.D.             |
| Wu, Hillary. MD<br>Loesch, David. MD (Fomer PI)    | 094788/033326                      | Central Indiana Cancer Centers 1346 E. County Line Road Indianapolis, Indiana 46227,                                                                  | US Oncology, Inc. Institutional Review Board,<br>10101 Woodloch Forest, The Woodlands,                                                                                     |

**CONFIDENTIAL**

| <b>Investigator</b>    | <b>Investigator no./Center no.</b> | <b>Description of Research Facility, Hospital/ Institution, and Address</b>                                                     | <b>Name of IEC/IRB Committee, Address, Committee Chair</b>                                                                                                          |
|------------------------|------------------------------------|---------------------------------------------------------------------------------------------------------------------------------|---------------------------------------------------------------------------------------------------------------------------------------------------------------------|
|                        |                                    | United States.                                                                                                                  | Texas 77380, United States.<br><br>Chairperson- Elizabeth Rogg, M.D.                                                                                                |
| Yanagihara, Ronald. MD | 062863/036715                      | Ronald H Yanagihara, MD<br>9360 No Name Uno<br>Suite 130 Gilroy, California 95020, United States.                               | Copernicus Group IRB, One Triangle Drive<br>Suite 100, PO Box 1 10605, Research<br>Triangle Park, North Carolina 27703.<br><br>Chairperson- Glenn C. Veit, JD, CIP  |
| Zrada, Stephen. MD     | 100120/032646                      | The Center for Cancer and Hematologic<br>Disease, 1930 E. Rte 70, Suite V-107, Cherry<br>Hill, New Jersey 08003, United States. | Copernicus Group IRB, One Triangle Drive,<br>Suite 100, PO Box 1 10605, Research<br>Triangle Park, North Carolina 27703.<br><br>Chairperson- Glenn C. Veit, JD, CIP |

\*No Patients Randomised.

All centres participated in the study under the US IND.
